# Supplementary material
Source: PubMed Central journal article supplement (PMC3170831)
Supplement: NIHMS314309-supplement-1_si_001.pdf [file NIHMS314309-supplement-1_si_001.pdf]

Supporting Online Material for:

**Enzymatic basis of ribosomal peptide prenylation in cyanobacteria**

John A McIntosh,<sup>†</sup> Mohamed S. Donia,<sup>†</sup> Satish K. Nair,<sup>#</sup> Eric W. Schmidt<sup>†\*</sup>

<sup>†</sup> Department of Medicinal Chemistry, University of Utah, Salt Lake City, UT 84112 USA

<sup>#</sup> Department of Biochemistry, University of Illinois at Urbana-Champaign, IL 61801 USA

\*[ews1@utah.edu](mailto:ews1@utah.edu)

This file contains:

Figures S1-S9

Materials and methods

Tables S1, S2

Supporting references

## Table of Contents

|                                                                             |         |
|-----------------------------------------------------------------------------|---------|
| 1. Figure S1. LC-FT-ICR and ESI-MS characterization of compounds reported   | S4-S41  |
| a. prenylated cyclo[APMPPYP] FT-ICR spectrum                                | S4      |
| b. prenylated cyclo[APMPPYP] LC-FT-ICR chromatogram                         | S5      |
| c. prenylated cyclo[APMPPYP] MS-MS spectra                                  | S6      |
| d. prenylated cyclo[APMPPYP] MS-MS assignments                              | S7      |
| e. prenylated APMPPYP FT-ICR spectrum                                       | S8      |
| f. prenylated APMPPYP LC-FT-ICR chromatogram                                | S9      |
| g. prenylated APMPPYP MS-MS spectra                                         | S10     |
| h. prenylated APMPPYP MS-MS assignments                                     | S11     |
| i. prenylated cyclo[APMPPPAPMPPYP] FT-ICR spectrum                          | S12     |
| j. prenylated cyclo[APMPPPAPMPPYP] LC-FT-ICR chromatogram                   | S13     |
| k. prenylated cyclo[APMPPPAPMPPYP] MS-MS spectra                            | S14     |
| l. prenylated cyclo[APMPPPAPMPPYP] MS-MS assignments                        | S15-S16 |
| m. singly prenylated cyclo[APMPPYPAPMPPYP] FT-ICR spectrum                  | S17     |
| n. singly prenylated cyclo[APMPPYPAPMPPYP] LC-FT-ICR chromatogram           | S18     |
| o. singly prenylated cyclo[APMPPYPAPMPPYP] MS-MS spectra                    | S19     |
| p. singly prenylated cyclo[APMPPYPAPMPPYP] MS-MS assignments                | S20-S21 |
| q. doubly prenylated cyclo[APMPPYPAPMPPYP] FT-ICR spectrum                  | S22     |
| r. doubly prenylated cyclo[APMPPYPAPMPPYP] LC-FT-ICR chromatogram           | S23     |
| s. doubly prenylated cyclo[APMPPYPAPMPPYP] MS-MS spectra                    | S24     |
| t. doubly prenylated cyclo[APMPPYPAPMPPYP] MS-MS assignments                | S25     |
| u. prenylated cyclo[KKPYILP] FT-ICR spectrum                                | S26     |
| v. prenylated cyclo[KKPYILP] LC-FT-ICR chromatogram                         | S27     |
| w. prenylated cyclo[KKPYILP] MS-MS spectrum                                 | S28     |
| x. prenylated cyclo[KKPYILP] MS-MS assignments                              | S29     |
| y. prenylated cyclo[KPYILP] FT-ICR spectrum                                 | S30     |
| z. prenylated cyclo[KPYILP] LC-FT-ICR chromatogram                          | S31     |
| aa. prenylated cyclo[KPYILP] MS-MS spectra                                  | S32     |
| bb. prenylated cyclo[KPYILP] MS-MS assignments                              | S33     |
| cc. prenylated KPYILP FT-ICR spectrum                                       | S34     |
| dd. prenylated KPYILP LC-FT-ICR chromatogram                                | S35     |
| ee. prenylated KPYILP MS-MS spectra                                         | S36     |
| ff. prenylated KPYILP MS-MS assignments                                     | S37     |
| gg. prenylated boc-L-tyrosine FT-ICR spectrum                               | S38     |
| hh. prenylated boc-L-tyrosine LC-FT-ICR chromatogram                        | S39     |
| ii. prenylated N-acetyl-L-tyrosine ESI-MS spectrum                          | S40     |
| 2. Figure S2. Precursor peptides are not substrates for prenyl transfer     | S41-S46 |
| a. Time course reaction of LynF with TruLy1 precursor at 0, 6, 12, and 24 h | S42-S45 |
| b. Radiolabel incorporation data for various substrates                     | S46     |

Table of Contents [continued]

|                                                                                      |         |
|--------------------------------------------------------------------------------------|---------|
| 3. Figure S3. NMR characterization of substrates cyclo[APMPPYP] and boc-L-Tyr        | S47-S52 |
| a. <sup>1</sup> H- <sup>13</sup> C HSQC of cyclo[APMPPYP] starting material          | S47     |
| b. <sup>1</sup> H- <sup>13</sup> C HSQC of C-prenylated cyclo[APMPPYP] product       | S48     |
| c. Overlay of data shown in (a), (b)                                                 | S49     |
| d. Table of assignments for data presented in (a), (b)                               | S50     |
| e. <sup>1</sup> H- <sup>13</sup> C HSQC of C-prenylated boc-L-tyrosine               | S51     |
| f. Table of assignments for data presented in (d) and numbered structure             | S52     |
| 4. Figure S4. Spectral properties of C- and O-prenylated tyrosyl compounds           | S53-S59 |
| a. LC-FT-ICR comparison of crude and pure C-prenyl cyclo[APMPPYP]                    | S54     |
| b. MS-MS spectra for cyclo[APMPPYP] isomers present in crude reaction mixtures       | S55     |
| c. Assignments of spectra presented in (b)                                           | S56     |
| d. MS-MS spectrum of purified NMR-characterized C-prenyl cyclo[APMPPYP]              | S57     |
| e. Assignments of spectrum presented in (d)                                          | S58     |
| 5. Figure S5. Analysis of reverse O-prenylated intermediate and C-prenylated product | S59-S63 |
| a. Full <sup>1</sup> H NMR of reverse O-prenylated intermediate                      | S60     |
| b. COSY NMR spectrum of reverse O-prenylated intermediate                            | S61     |
| c. Full <sup>1</sup> H NMR of forward C-prenylated product                           | S62     |
| d. CD spectra of L- and D-tyrosine and forward C-prenylated L- and D-tyrosine        | S63     |
| 6. Figure S6. Non-enzymatic rearrangement of reverse O-prenylated tyrosine           | S64     |
| 7. Figure S7. Kinetics of prenylation of cyclo[APMPPYP] and boc-L-tyrosine           | S65-S68 |
| 8. Figure S8. Multiple sequence alignments of LynF and relatives                     | S69-S70 |
| 9. Figure S9. Sizing column chromatogram for LynF and resulting SDS-PAGE gel         | S71-S72 |
| 10. Materials and Methods                                                            | S73-S77 |
| 11. Table S1. Substrates used in this study                                          | S78     |
| 12. Table S2. Summary of FT-ICR data                                                 | S79     |
| 13. References                                                                       | S80     |

**Figure S1.** LC-FT-ICR and MS-MS, or ESI-MS characterization of products of reactions containing: (a-d) cyclo[APMPPYP] (e-h) APMPPYP (i-l) cyclo[APMPPYPAPMPPP] (m-p), (q-t) cyclo[APMPPYPAPMPPYP] (u-x) cyclo[KKPYILP] (y-bb) cyclo[KPYILP] (cc-ff) KPYILP (gg-hh) boc-L-Tyr (ii) N-acetyl-L-Tyr. Note that prenylated tyrosine is denoted by a lower-case 'y', while unmodified tyrosine is denoted by an upper-case 'Y'

(a) FT-ICR data showing ion whose mass (+/- 2 ppm) corresponds to prenylated cyclo[APMPPyP]

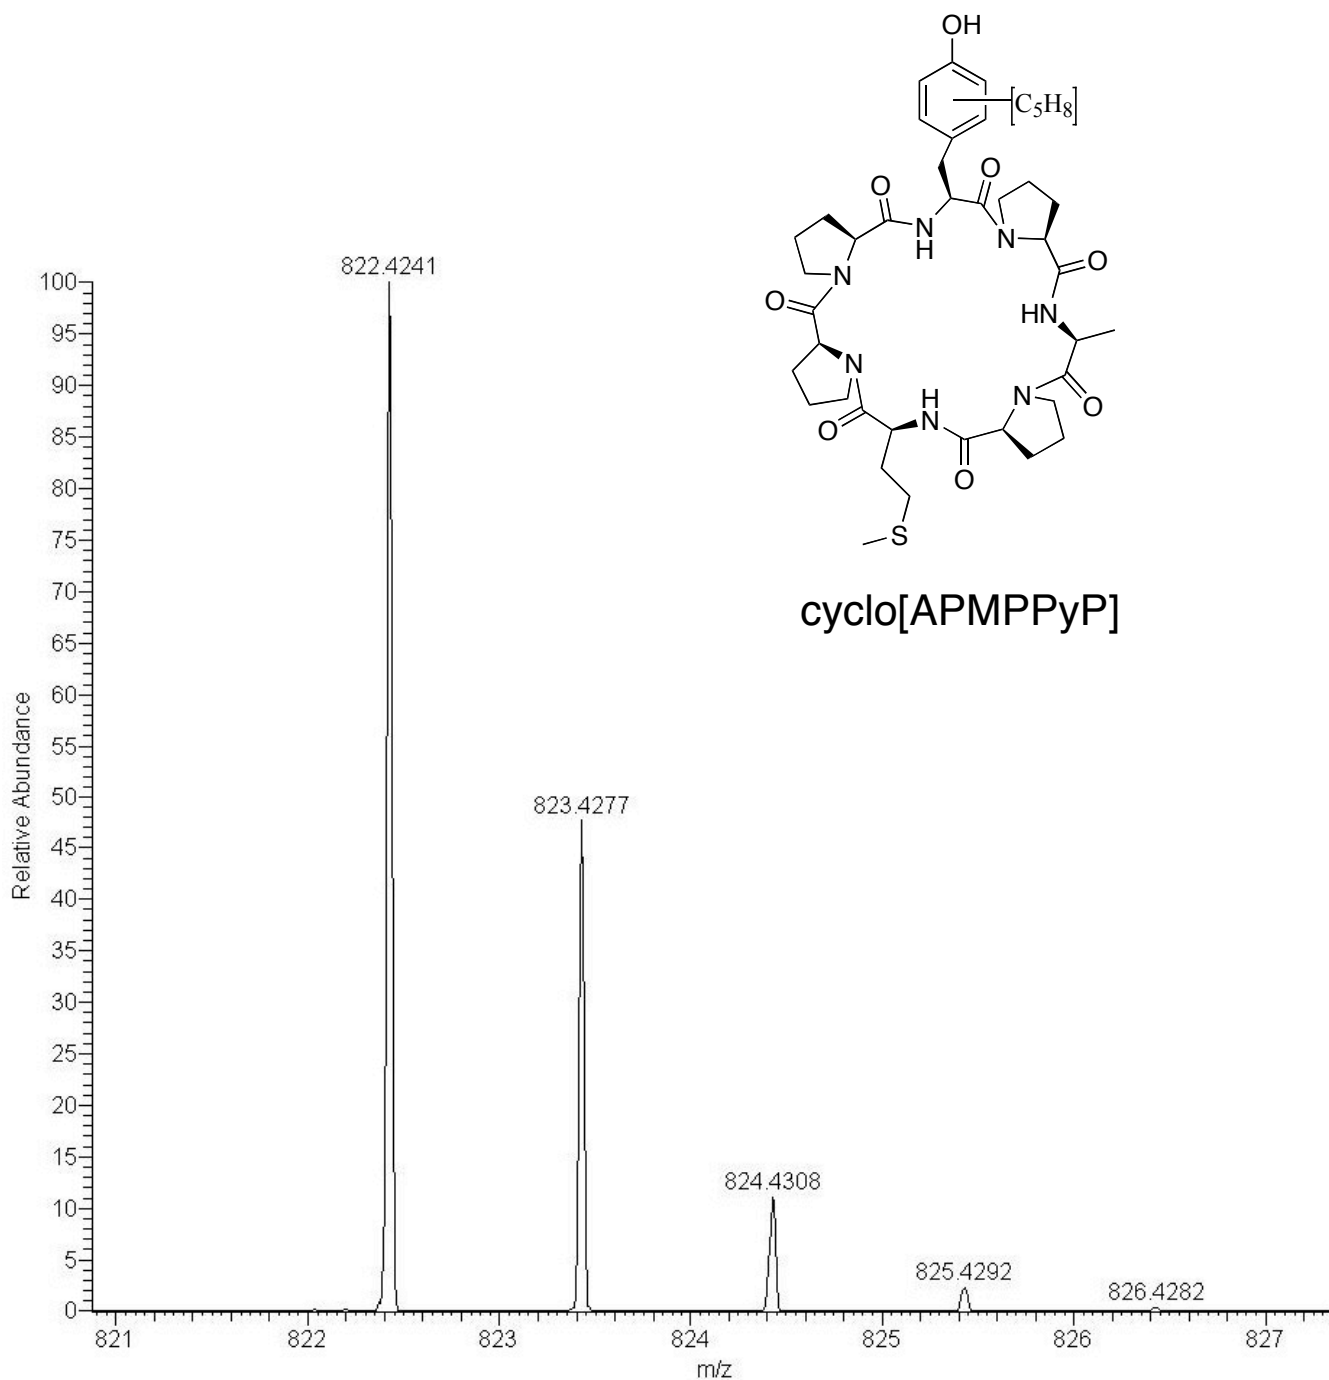

(b) LC-FT-ICR chromatogram selected for mass of prenylated cyclo[APMPPYP]

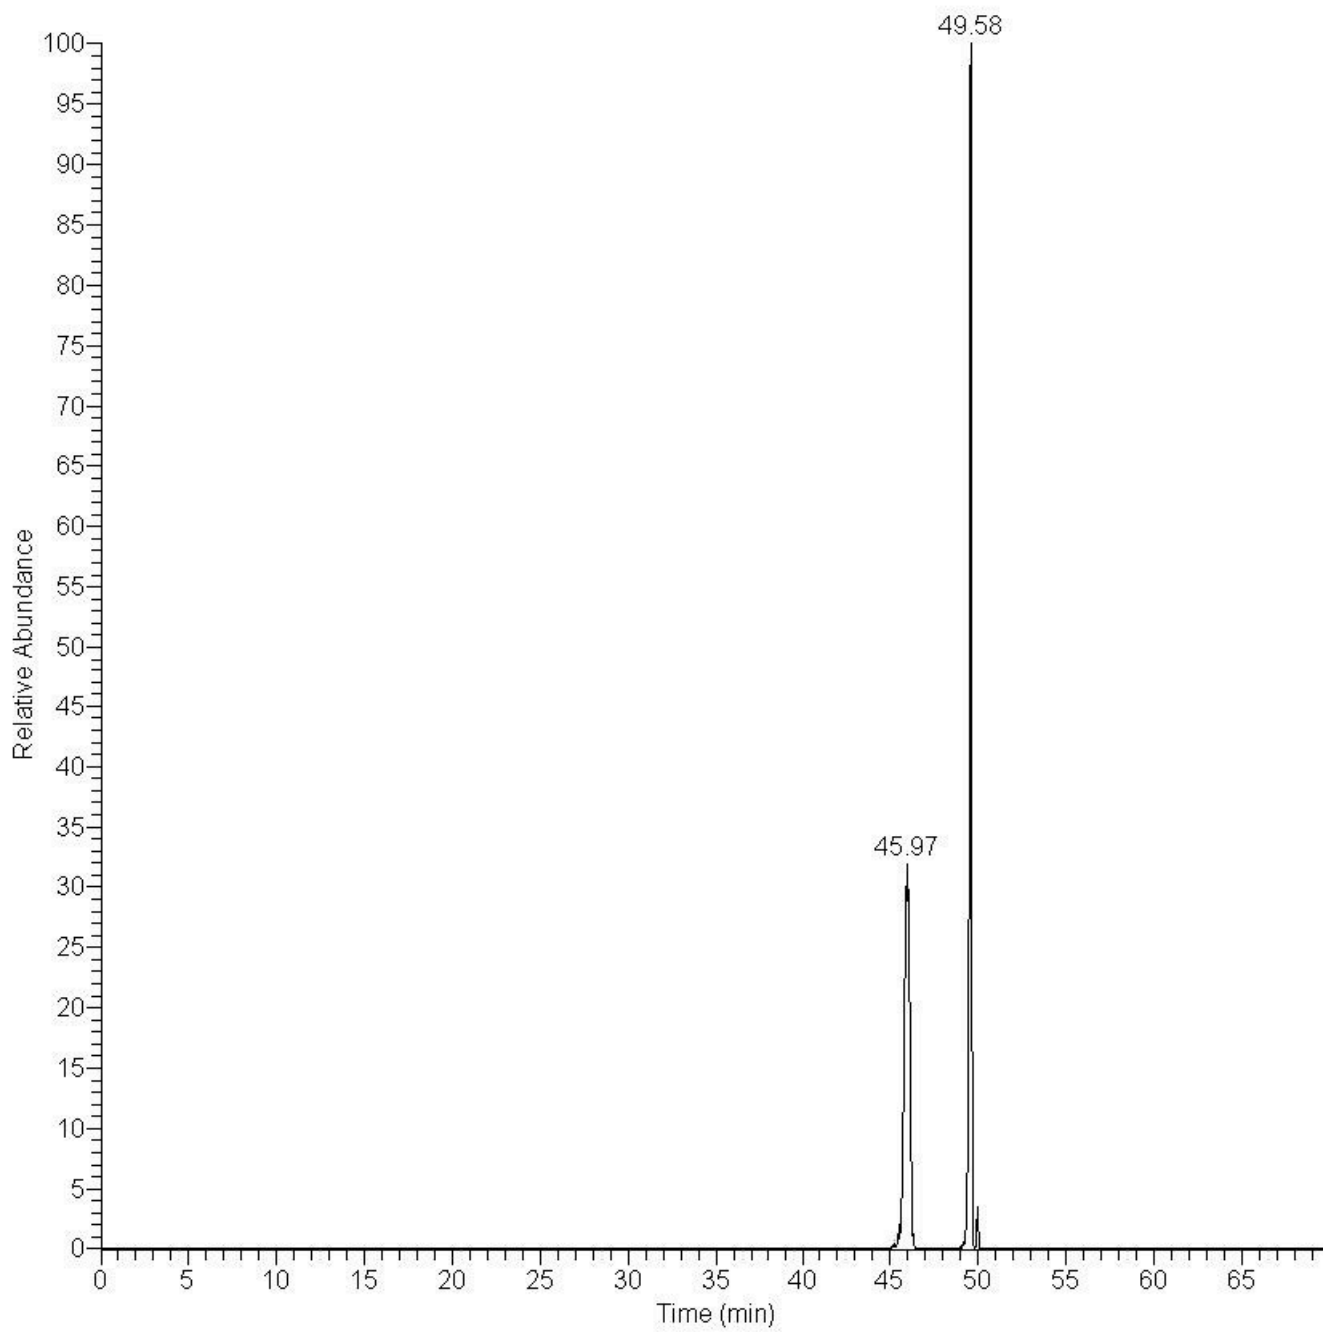

(c) MS-MS spectra for early (top) and late (bottom) eluting products of the reaction of LynF with cyclo[APMPPYP] (see chromatogram on previous page)

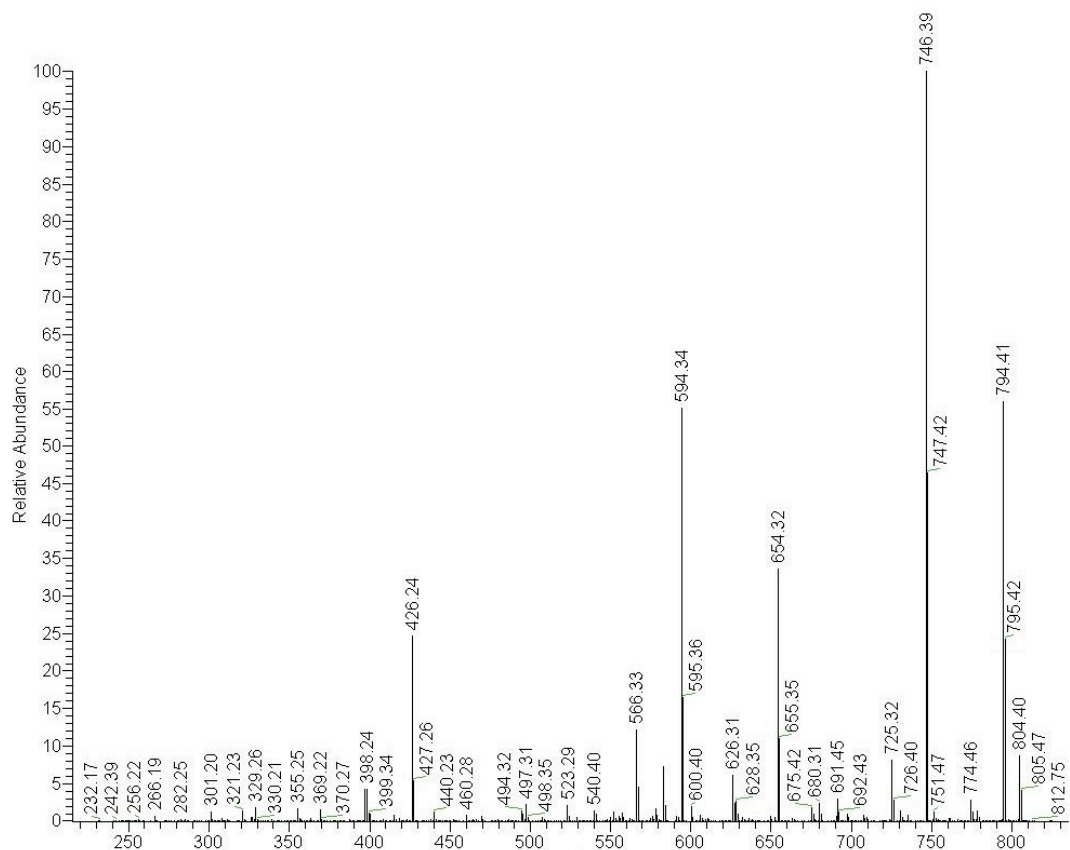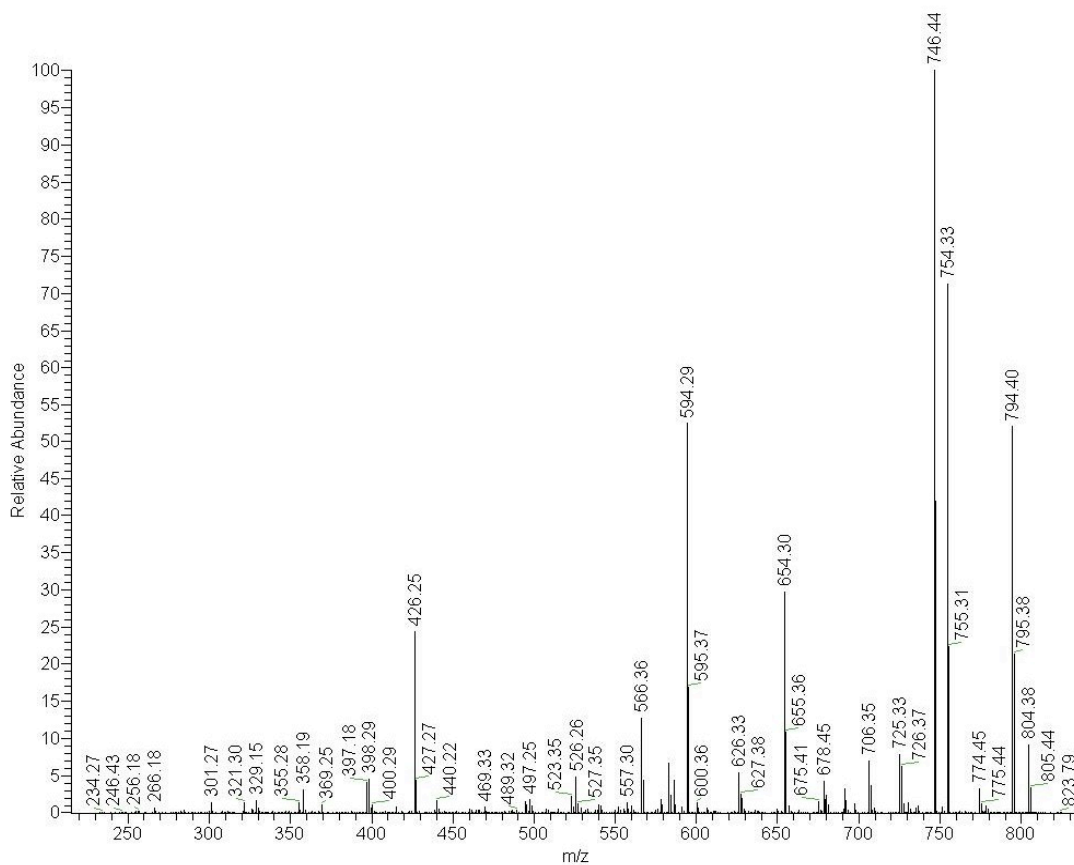

## (d) MS-MS assignments for prenylated cyclo[APMPPYP] early (top) and late (bottom) eluting isomers

| cyclo[APMPPYP] 1st peak (C-prenyl) |          |          |                          |          |          |  |
|------------------------------------|----------|----------|--------------------------|----------|----------|--|
| y- and b- cleavages (+1)           | Expected | Observed | y- and b- cleavages (+1) | Expected | Observed |  |
| AP                                 | 169.10   | -        | yP                       | 329.19   | 329.26   |  |
| APM                                | 300.14   | -        | yPA                      | 400.22   | 400.29   |  |
| APMP                               | 397.19   | 397.16   | yPAP                     | 497.28   | 497.31   |  |
| APMPP                              | 494.24   | 494.32   | yPAPM                    | 628.32   | 628.35   |  |
| APMPPy                             | 725.37   | 725.32   | yPAPMP                   | 725.37   | 725.32   |  |
| PM                                 | 229.10   | -        | PA                       | 169.10   | -        |  |
| PMP                                | 326.15   | -        | PAP                      | 266.15   | 266.19   |  |
| PMPP                               | 423.21   | -        | PAPM                     | 397.19   | -        |  |
| PMPPy                              | 654.33   | 654.32   | PAPMP                    | 494.24   | 494.32   |  |
| PMPPyP                             | 751.39   | 751.47   | PAPMPP                   | 591.30   | 591.35   |  |
| MP                                 | 229.10   | -        |                          |          |          |  |
| MPP                                | 326.15   | -        | Miscellaneous Ions       |          |          |  |
| MPPy                               | 557.28   | 557.43   | -H <sub>2</sub> O        | 804.41   | 804.40   |  |
| MPPyP                              | 654.33   | 654.32   | -Acylium (C=O)           | 794.42   | 794.41   |  |
| MPPyPA                             | 725.37   | 725.32   | -Methyl sulfide          | 774.42   | 774.46   |  |
| PP                                 | 263.18   | -        | -Met side-chain          | 746.39   | 746.39   |  |
| PPy                                | 426.24   | 426.24   | PyPAP y- a- cleavage     | 566.33   | 566.33   |  |
| PPyP                               | 523.29   | 523.29   |                          |          |          |  |
| PPyPA                              | 594.33   | 594.34   |                          |          |          |  |
| PPyPAP                             | 691.38   | 691.45   |                          |          |          |  |
| Py                                 | 329.19   | 329.26   |                          |          |          |  |
| PyP                                | 426.24   | 426.24   |                          |          |          |  |
| PyPA                               | 497.28   | 497.31   |                          |          |          |  |
| PyPAP                              | 594.33   | 594.34   |                          |          |          |  |
| PyPAPM                             | 725.37   | 725.32   |                          |          |          |  |
| cyclo[APMPPYP] 2nd peak (O-prenyl) |          |          |                          |          |          |  |
| y- and b- cleavages (+1)           | Expected | Observed | y- and b- cleavages (+1) | Expected | Observed |  |
| AP                                 | 169.10   | -        | yP                       | 329.19   | 329.15   |  |
| APM                                | 300.14   | -        | yPA                      | 400.22   | 400.29   |  |
| APMP                               | 397.19   | 397.18   | yPAP                     | 497.28   | 497.25   |  |
| APMPP                              | 494.24   | 494.28   | yPAPM                    | 628.32   | 628.34   |  |
| APMPPy                             | 725.37   | 725.33   | yPAPMP                   | 725.37   | 725.33   |  |
| PM                                 | 229.10   | -        | PA                       | 169.10   | -        |  |
| PMP                                | 326.15   | 326.19   | PAP                      | 266.15   | 266.18   |  |
| PMPP                               | 423.21   | -        | PAPM                     | 397.19   | 397.18   |  |
| PMPPy                              | 654.33   | 654.30   | PAPMP                    | 494.24   | 494.28   |  |
| PMPPyP                             | 751.39   | 751.35   | PAPMPP                   | 591.30   | 591.34   |  |
| MP                                 | 229.10   | -        |                          |          |          |  |
| MPP                                | 326.15   | 326.19   | Miscellaneous Ions       |          |          |  |
| MPPy                               | 557.28   | 557.30   | -H <sub>2</sub> O        | 804.41   | 804.38   |  |
| MPPyP                              | 654.33   | 654.30   | -Acylium (C=O)           | 794.42   | 794.40   |  |
| MPPyPA                             | 725.37   | 725.33   | -Methyl sulfanyl radical | 774.42   | 774.45   |  |
| PP                                 | 263.18   | -        | -Prenyl                  | 754.35   | 754.33   |  |
| PPy                                | 426.24   | 426.25   | -Met side-chain          | 746.39   | 746.44   |  |
| PPyP                               | 523.29   | 523.34   | PyPAP y- a- cleavage     | 566.33   | 566.36   |  |
| PPyPA                              | 594.33   | 594.29   | PPyPA -Prenyl            | 526.27   | 526.26   |  |
| PPyPAP                             | 691.38   | 691.44   | PPy, PyP -Prenyl         | 358.18   | 358.19   |  |
| Py                                 | 329.19   | 329.15   |                          |          |          |  |
| PyP                                | 426.24   | 426.25   |                          |          |          |  |
| PyPA                               | 497.28   | 497.25   |                          |          |          |  |
| PyPAP                              | 594.33   | 594.29   |                          |          |          |  |
| PyPAPM                             | 725.37   | 725.33   |                          |          |          |  |

(e) FT-ICR data showing ion whose mass (+/- 2 ppm) corresponds to prenylated APMPPyP

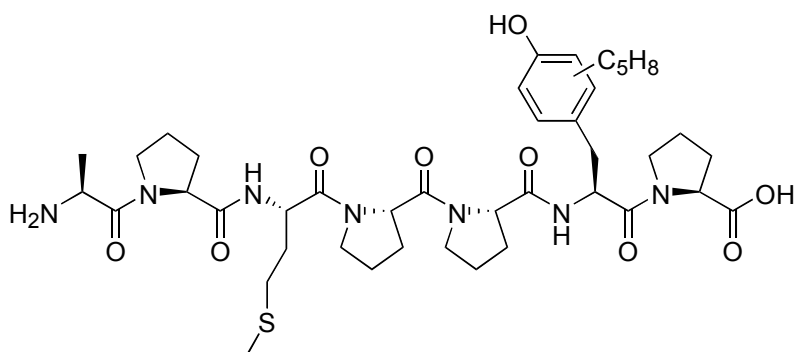

APMPPyP

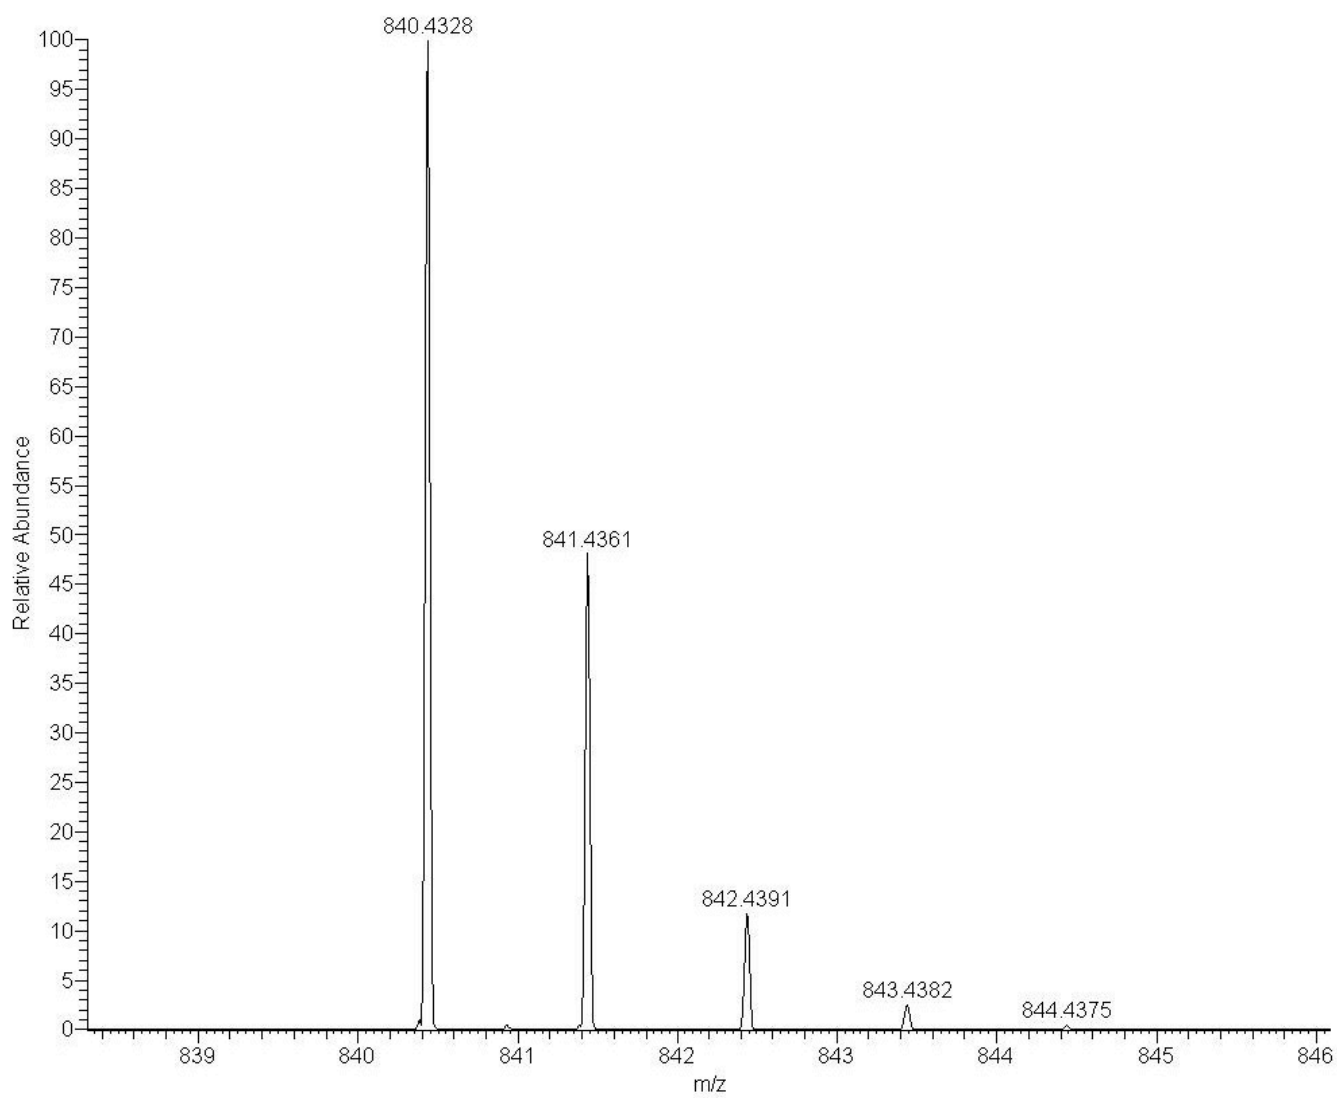



(f) LC-FT-ICR chromatogram selected for mass of prenylated APMPPYP

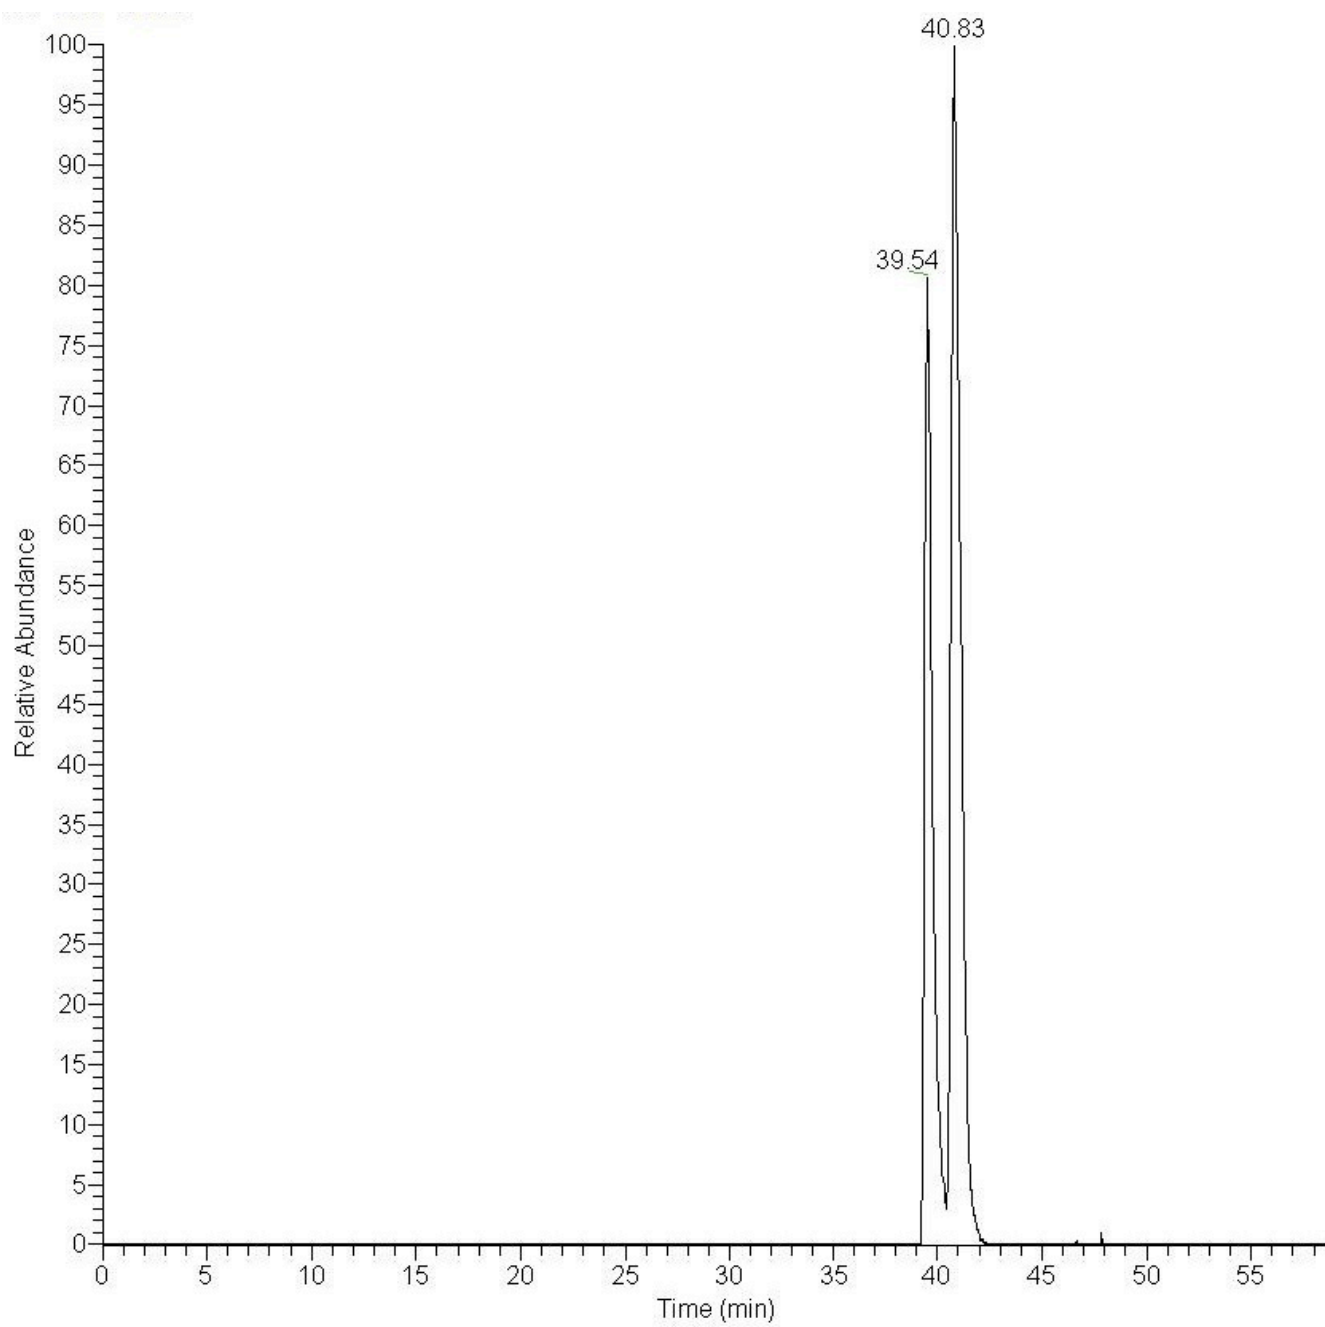

(g) MS-MS spectra for early (top) and late (bottom) eluting products of the reaction of LynF with APMPYP (see chromatogram on previous page)

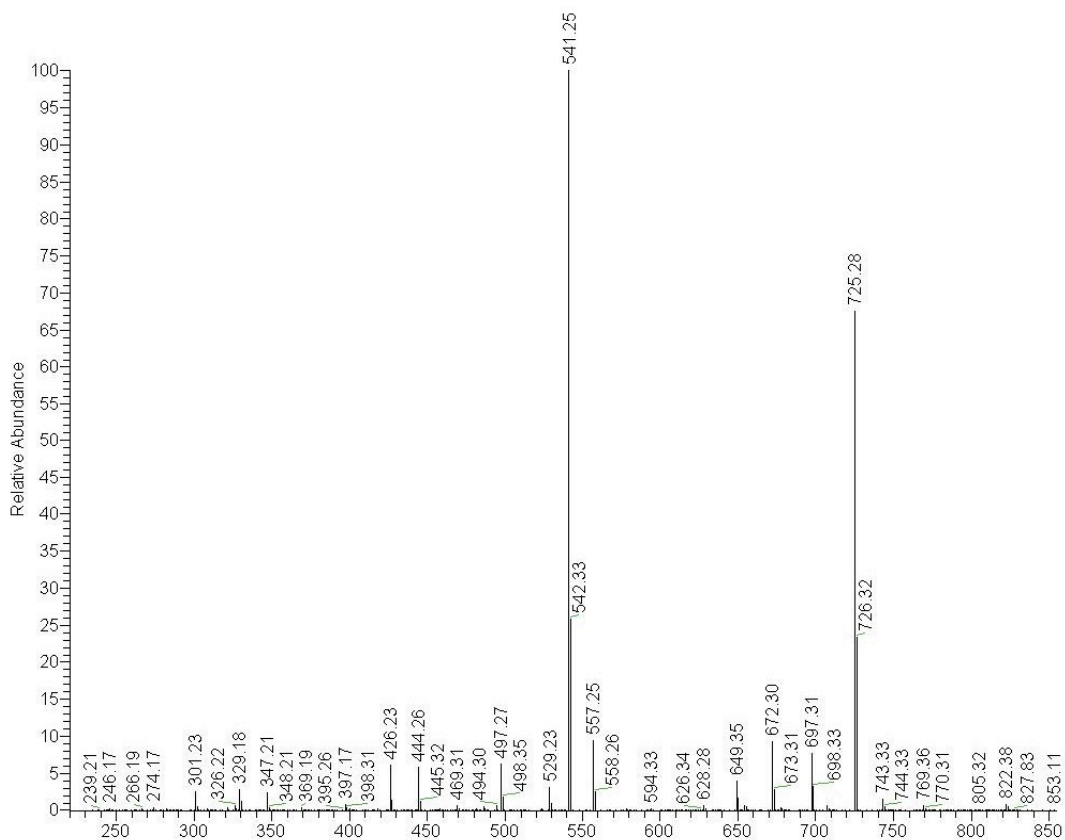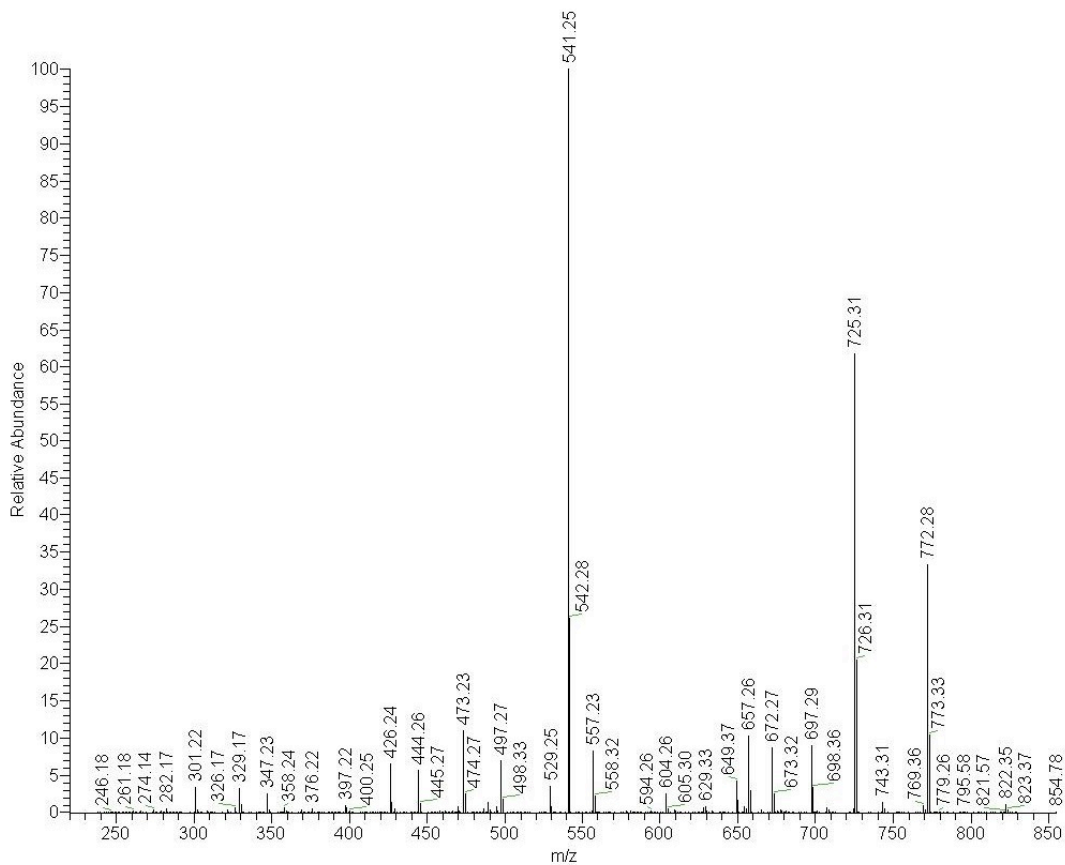

(h) MS-MS assignments for prenylated APMPPYP early (top) and late (bottom) eluting isomers

| <b>APMPPYP 1st peak (C-prenyl)</b> |                 |                 |
|------------------------------------|-----------------|-----------------|
| <b>b-ions (+1)</b>                 | <b>Expected</b> | <b>Observed</b> |
| <b>AP</b>                          | 169.10          | -               |
| <b>APM</b>                         | 300.14          | -               |
| <b>APMP</b>                        | 397.19          | 397.22          |
| <b>APMPP</b>                       | 494.24          | 494.33          |
| <b>APMPPy</b>                      | 725.37          | 725.31          |
| <b>y-ions (+1)</b>                 |                 |                 |
| <b>PMPPyP</b>                      | 769.39          | 769.36          |
| <b>MPPyP</b>                       | 672.34          | 672.27          |
| <b>PPyP</b>                        | 541.30          | 541.25          |
| <b>PyP</b>                         | 444.25          | 444.26          |
| <b>Py</b>                          | 347.19          | 347.23          |
|                                    |                 |                 |
| <b>y- b- cleavages (+1)</b>        |                 |                 |
| <b>Py</b>                          | 329.19          | 329.17          |
| <b>PPy</b>                         | 426.24          | 426.24          |
| <b>MPPy</b>                        | 557.28          | 557.25          |
|                                    |                 |                 |
| <b>y- a- cleavages (+1)</b>        |                 |                 |
| <b>Py</b>                          | 301.19          | 301.22          |
|                                    |                 |                 |
| <b>Miscellaneous Ions</b>          |                 |                 |
| <b>APMPPy a-cleavage +1</b>        | 697.37          | 697.31          |

| <b>APMPPYP 2nd peak (O-prenyl)</b> |                 |                 |
|------------------------------------|-----------------|-----------------|
| <b>b-ions (+1)</b>                 | <b>Expected</b> | <b>Observed</b> |
| <b>AP</b>                          | 169.10          | -               |
| <b>APM</b>                         | 300.14          | -               |
| <b>APMP</b>                        | 397.19          | 397.22          |
| <b>APMPP</b>                       | 494.24          | -               |
| <b>APMPPy</b>                      | 725.37          | 725.31          |
| <b>y-ions (+1)</b>                 |                 |                 |
| <b>PMPPyP</b>                      | 769.39          | 769.36          |
| <b>MPPyP</b>                       | 672.34          | 672.27          |
| <b>PPyP</b>                        | 541.30          | 541.25          |
| <b>PyP</b>                         | 444.25          | 444.26          |
| <b>Py</b>                          | 347.19          | 347.23          |
|                                    |                 |                 |
| <b>y- b- cleavages (+1)</b>        |                 |                 |
| <b>Py</b>                          | 329.19          | 329.17          |
| <b>PPy</b>                         | 426.24          | 426.24          |
| <b>MPPy</b>                        | 557.28          | 557.23          |
|                                    |                 |                 |
| <b>y- a- cleavages (+1)</b>        |                 |                 |
| <b>Py</b>                          | 301.19          | 301.22          |
|                                    |                 |                 |
| <b>Miscellaneous Ions</b>          |                 |                 |
| <b>All -prenyl</b>                 | 772.37          | 772.28          |
| <b>APMPPy a-cleavage +1</b>        | 697.37          | 697.29          |
| <b>APMPPy -prenyl</b>              | 657.31          | 657.26          |
| <b>PPyP -prenyl</b>                | 473.24          | 473.23          |

(i) FT-ICR data showing ion whose mass ( $\pm 2$  ppm) corresponds to prenylated cyclo[APMPPPAPMPPYP]

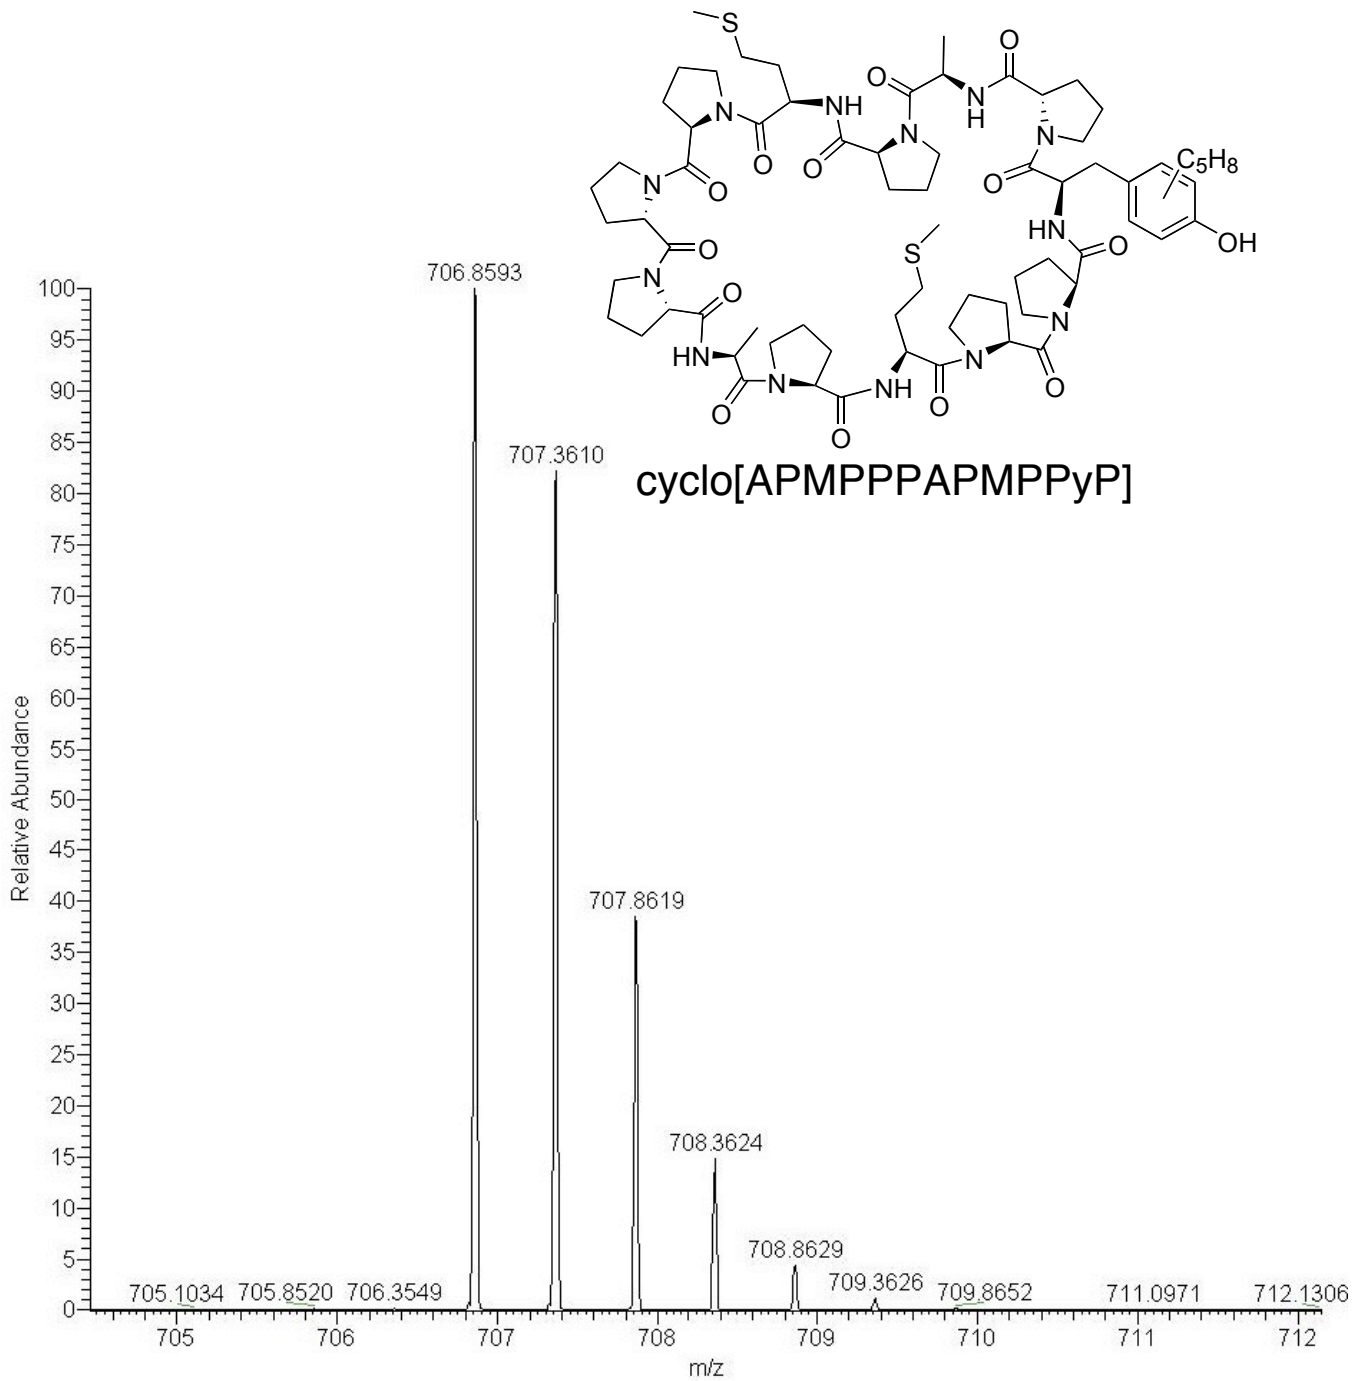

(j) LC-FT-ICR chromatogram selected for mass of prenylated cyclo[APMPPPAPMPPYP]

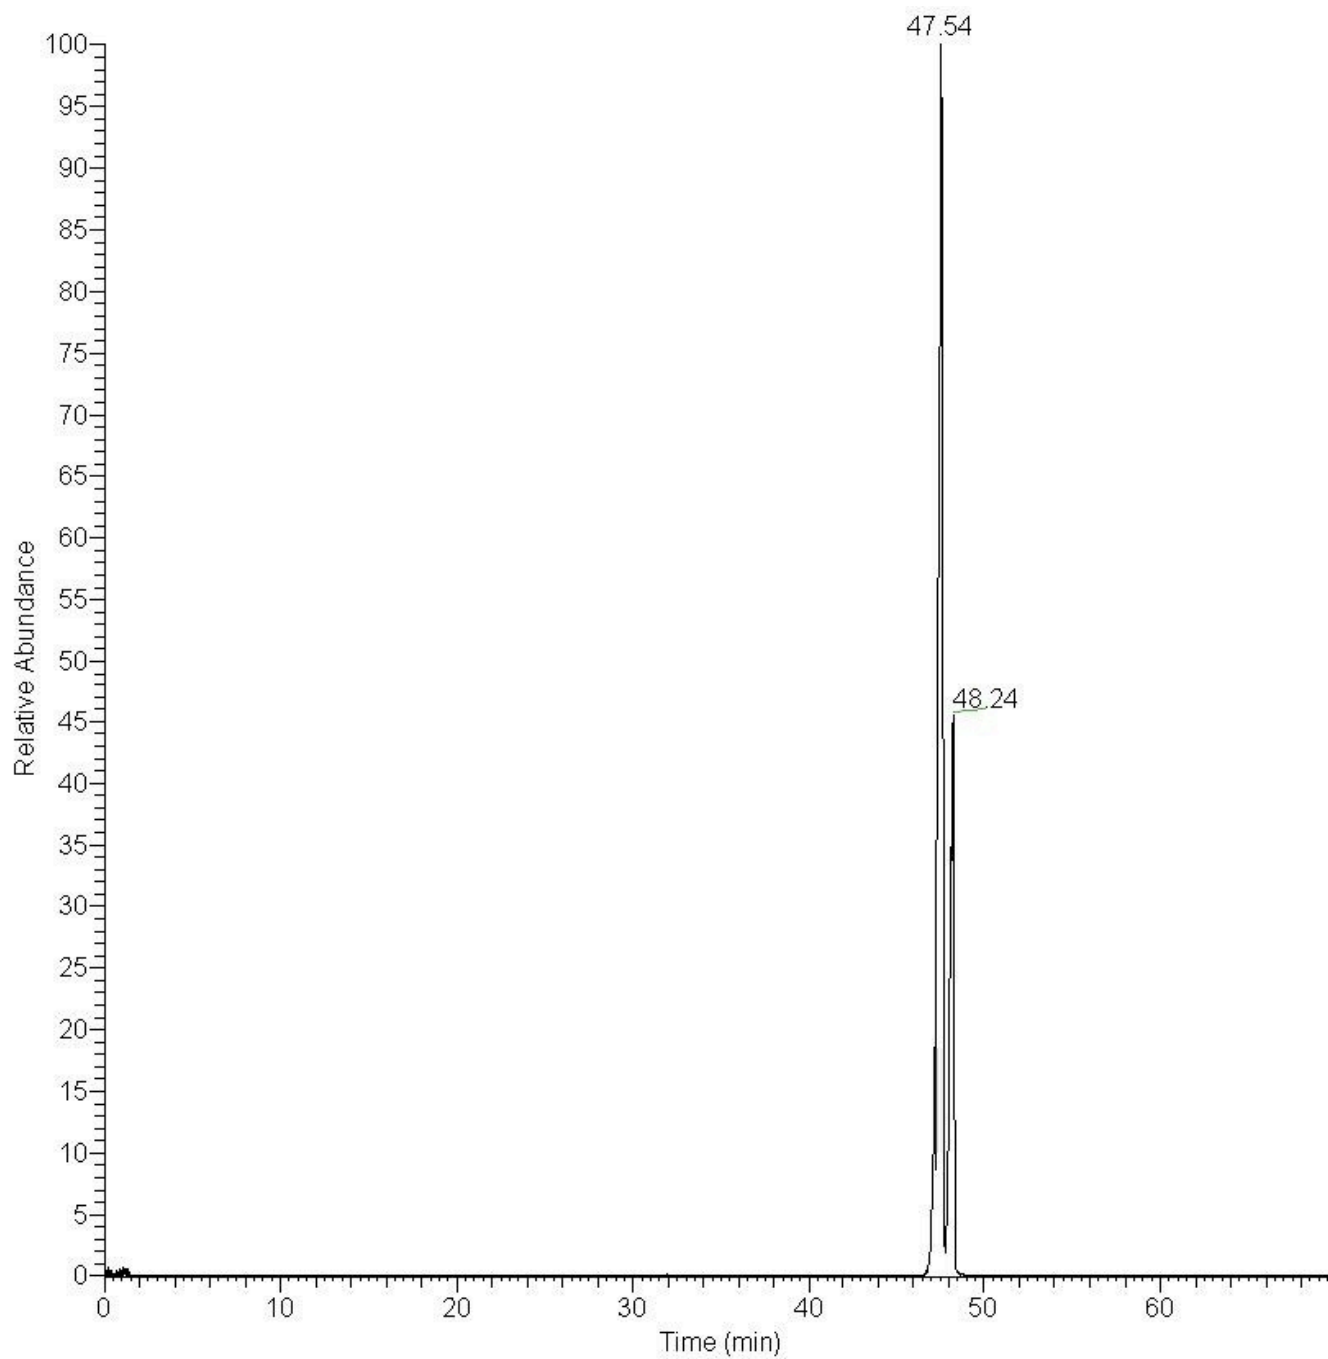

(k) MS-MS spectra for early (top) and late (bottom) eluting products of the reaction of LynF with cyclo[APMPPPAPMPPYP] (see chromatogram on previous page)

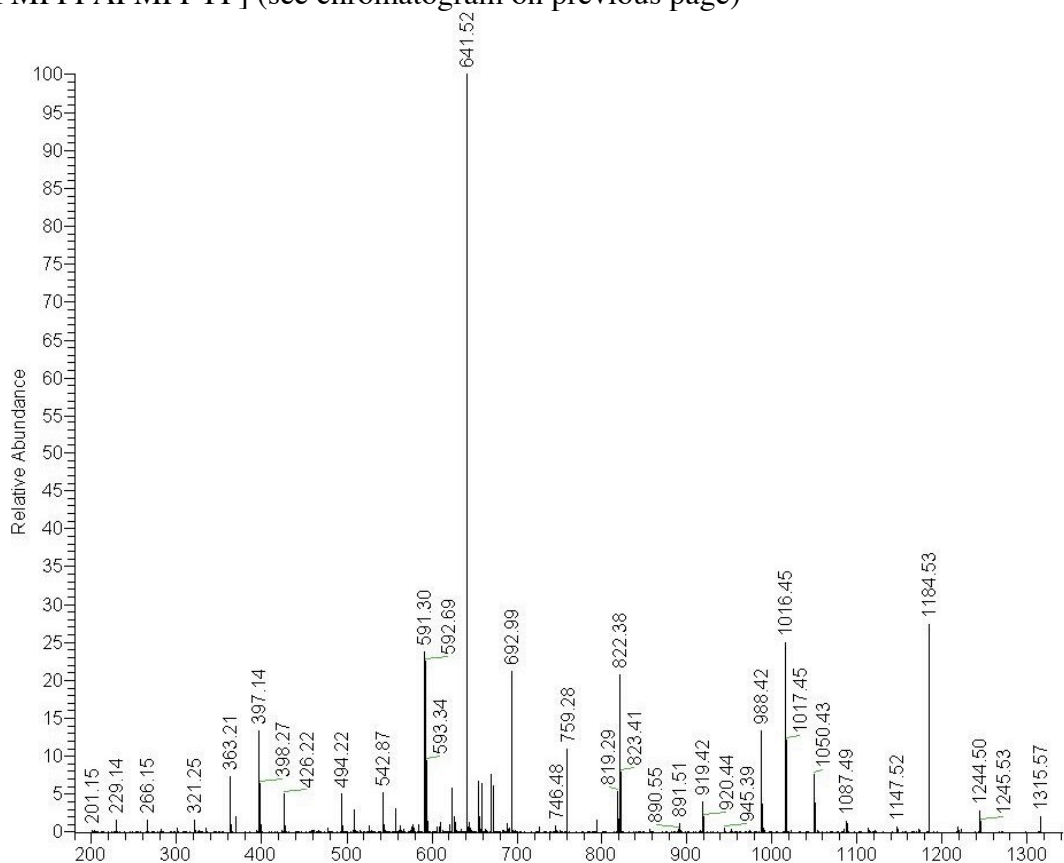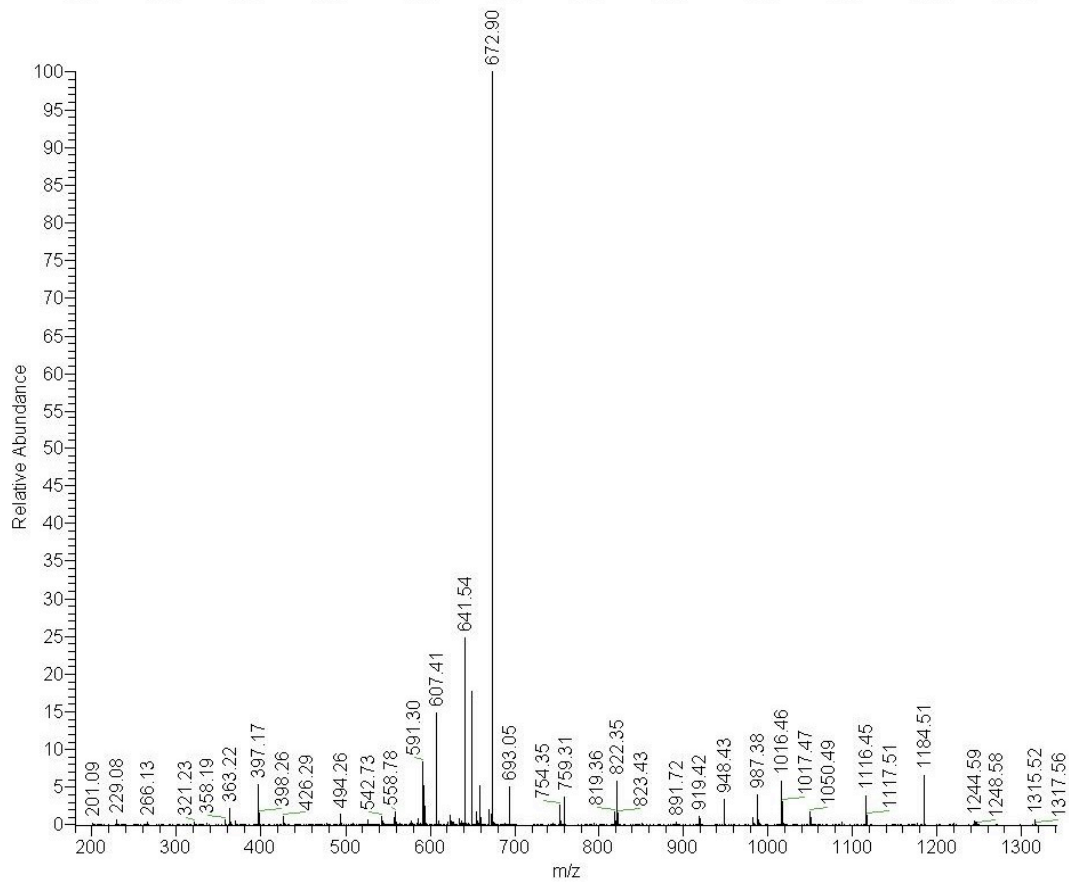

(I) MS-MS assignments for prenylated cyclo[APMPPPAPMPPYP] early (this page) and late (next page) eluting isomers

| cyclo[APMPPPAPMPPYP] 1st peak (C-prenyl) |          |          |                      |          |          |                      |          |          |
|------------------------------------------|----------|----------|----------------------|----------|----------|----------------------|----------|----------|
| y- b- cleavages (+1)                     | Expected | Observed | y- b- cleavages (+1) | Expected | Observed | y- b- cleavages (+1) | Expected | Observed |
| APM                                      | 300.14   | 300.22   | MPPPAPMPPy           | 1147.57  | 1147.52  | PAPMPPy              | 822.42   | 822.38   |
| APMP                                     | 397.19   | 397.14   | MPPPAPMPPyP          | 1244.62  | 1244.51  | PAPMPPyP             | 919.47   | 919.42   |
| APMPP                                    | 494.24   | 494.22   | MPPPAPMPPyPA         | 1315.66  | 1315.57  | PAPMPPyPAP           | 1087.56  | 1087.49  |
| APMPPP                                   | 591.30   | 591.3    | PPPA                 | 363.20   | 363.21   | PAPMPPyPAPM          | 1218.60  | 1218.53  |
| APMPPPAP                                 | 759.39   | 759.28   | PPPAP                | 460.26   | 460.28   | PAPMPPyPAPMP         | 1315.66  | 1315.57  |
| APMPPPAPM                                | 890.43   | 890.54   | PPPAPM               | 591.30   | 591.3    | APM                  | 300.14   | 300.22   |
| APMPPPAPMP                               | 987.48   | 987.42   | PPPAPMP              | 688.35   | 688.39   | APMP                 | 397.19   | 397.14   |
| APMPPPAPMPP                              | 1084.53  | 1084.5   | PPPAPMPP             | 785.40   | 785.47   | APMPP                | 494.24   | 494.22   |
| APMPPPAPMPPy                             | 1315.66  | 1315.57  | PPPAPMPPy            | 1016.53  | 1016.45  | APMPPy               | 725.37   | 725.38   |
| PM                                       | 229.10   | 229.14   | PPPAPMPPyP           | 1113.58  | 1113.52  | APMPPyP              | 822.42   | 822.38   |
| PMP                                      | 326.15   | 326.1    | PPPAPMPPyPA          | 1184.62  | 1184.52  | APMPPyPAPMP          | 1218.60  | 1218.53  |
| PMPP                                     | 423.21   | 423.22   | PPA                  | 266.15   | 266.15   | APMPPyPAPMPP         | 1315.66  | 1315.57  |
| PMPPP                                    | 520.26   | 520.28   | PPAP                 | 363.20   | 363.21   | PM                   | 229.10   | 229.14   |
| PMPPPA                                   | 591.30   | 591.3    | PPAPM                | 494.24   | 494.22   | PMP                  | 326.15   | 326.1    |
| PMPPPAP                                  | 688.35   | 688.39   | PPAPMP               | 591.30   | 591.3    | PMPP                 | 423.21   | 423.22   |
| PMPPPAPM                                 | 819.39   | 819.3    | PPAPMPP              | 688.35   | 688.39   | PMPPy                | 654.33   | 654.31   |
| PMPPPAPMP                                | 916.44   | 916.46   | PPAPMPPy             | 919.47   | 919.42   | PMPPyP               | 751.38   | 751.41   |
| PMPPPAPMPPy                              | 1244.62  | 1244.51  | PPAPMPPyP            | 1016.53  | 1016.45  | PMPPyPA              | 822.42   | 822.38   |
| MP                                       | 229.10   | 229.14   | PPAPMPPyPA           | 1087.56  | 1087.49  | PMPPyPAP             | 919.47   | 919.42   |
| MPP                                      | 326.15   | 326.1    | PPAPMPPyPAP          | 1184.62  | 1184.52  | PMPPyPAPM            | 1050.51  | 1050.43  |
| MPPP                                     | 423.21   | 423.22   | PPAPMPPyPAPM         | 1315.66  | 1315.57  | PMPPyPAPMP           | 1147.57  | 1147.52  |
| MPPPA                                    | 494.24   | 494.22   | PAP                  | 266.15   | 266.15   | PMPPyPAPMPP          | 1244.62  | 1244.51  |
| MPPPAP                                   | 591.30   | 591.3    | PAPM                 | 397.19   | 397.14   | MP                   | 229.10   | 229.14   |
| MPPPAPMP                                 | 819.39   | 819.3    | PAPMP                | 494.24   | 494.22   | MPP                  | 326.15   | 326.1    |
| MPPPAPMPP                                | 916.44   | 916.46   | PAPMPP               | 591.30   | 591.3    | MPPy                 | 557.28   | 557.36   |

| y- b- cleavages (+1) | Expected | Observed | y- b- cleavages (+1) | Expected | Observed | Miscellaneous Ions           | Expected | Observed |
|----------------------|----------|----------|----------------------|----------|----------|------------------------------|----------|----------|
| MPPyP                | 654.33   | 654.31   | yPAPMPP              | 822.42   | 822.38   | All, -acylium, +2            | 692.86   | 692.99   |
| MPPyPA               | 725.37   | 725.38   | yPAPMPPP             | 919.47   | 919.42   | PPPAPMPPY, y- a- cleavage +1 | 988.53   | 988.42   |
| MPPyPAP              | 822.42   | 822.38   | yPAPMPPPAP           | 1087.56  | 1087.49  | PAPM -Met sidechain          | 321.16   | 321.25   |
| MPPyPAPM             | 953.46   | 953.48   | yPAPMPPPAPM          | 1218.60  | 1184.52  |                              |          |          |
| MPPyPAPMP            | 1050.51  | 1050.43  | yPAPMPPPAPMP         | 1315.66  | 1315.57  |                              |          |          |
| MPPyPAPMPP           | 1147.57  | 1147.52  | PAP                  | 266.15   | 266.15   |                              |          |          |
| MPPyPAPMPPP          | 1244.62  | 1244.51  | PAPM                 | 397.19   | 397.14   |                              |          |          |
| MPPyPAPMPPPA         | 1315.66  | 1315.57  | PAPMP                | 494.24   | 494.22   |                              |          |          |
| PPy                  | 426.24   | 426.22   | PAPMPP               | 591.30   | 591.3    |                              |          |          |
| PPyPA                | 594.33   | 594.33   | PAPMPPP              | 688.35   | 688.39   |                              |          |          |
| PPyPAPM              | 822.42   | 822.38   | PAPMPPPA             | 759.39   | 759.28   |                              |          |          |
| PPyPAPMP             | 919.47   | 919.42   | PAPMPPPAP            | 856.44   | 856.33   |                              |          |          |
| PPyPAPMPP            | 1016.53  | 1016.45  | PAPMPPPAPM           | 987.48   | 987.42   |                              |          |          |
| PPyPAPMPPP           | 1113.58  | 1113.52  | PAPMPPPAPMP          | 1084.53  | 1084.5   |                              |          |          |
| PPyPAPMPPPA          | 1184.62  | 1184.52  |                      |          |          |                              |          |          |
| PyP                  | 426.24   | 426.22   | y- b- cleavages (+2) |          |          |                              |          |          |
| PyPAP                | 594.33   | 594.33   | PAPMPPPAP            | 428.72   | 428.83   |                              |          |          |
| PyPAPM               | 725.37   | 725.38   | PyPAPMPPP            | 508.77   | 508.83   |                              |          |          |
| PyPAPMP              | 822.42   | 822.38   | PMPPyPAPM            | 525.76   | 525.76   |                              |          |          |
| PyPAPMPP             | 919.47   | 919.42   | APMPPPAPMPP          | 542.77   | 542.87   |                              |          |          |
| PyPAPMPPP            | 1016.53  | 1016.45  | PPAPMPPyPAP          | 592.82   | 592.69   |                              |          |          |
| PyPAPMPPPA           | 1087.56  | 1087.49  | PAPMPPyPAPM          | 609.81   | 609.84   |                              |          |          |
| PyPAPMPPPAP          | 1184.62  | 1184.52  | PMPPyPAPMPP          | 622.81   | 623.00   |                              |          |          |
| PyPAPMPPPAPM         | 1315.66  | 1315.57  | PPyPAPMPPPAP         | 641.34   | 641.52   |                              |          |          |
| yPAPMP               | 725.37   | 725.38   | PAPMPPyPAPMP         | 658.34   | 658.31   |                              |          |          |

| cyclo[APMPPPAPMPYP] 2nd peak (O-prenyl) |          |          |                             |          |          |                      |          |          |
|-----------------------------------------|----------|----------|-----------------------------|----------|----------|----------------------|----------|----------|
| y- b- cleavages (+1)                    | Expected | Observed | y- b- cleavages (+1)        | Expected | Observed | y- b- cleavages (+1) | Expected | Observed |
| APMP                                    | 397.19   | 397.17   | MPPPAPMPYP                  | 1244.62  | 1244.59  | PAPMPYP              | 990.51   | 990.48   |
| APMPP                                   | 494.24   | 494.26   | MPPPAPMPYP                  | 1315.66  | 1315.52  | PAPMPYP              | 1087.56  | 1087.50  |
| APMPPP                                  | 591.30   | 591.30   | PPPA                        | 363.20   | 363.22   | PAPMPYP              | 1218.60  | 1218.69  |
| APMPPPAP                                | 759.39   | 759.31   | PPPAP                       | 460.26   | 460.42   | PAPMPYP              | 1315.66  | 1315.52  |
| APMPPPAPM                               | 890.43   | 890.45   | PPPAPM                      | 591.30   | 591.30   | APMP                 | 397.19   | 397.17   |
| APMPPPAPMP                              | 987.48   | 987.38   | PPPAPMP                     | 688.35   | 688.32   | APMPP                | 494.24   | 494.26   |
| APMPPPAPMPP                             | 1084.53  | 1084.64  | PPPAPMPP                    | 785.40   | 785.52   | APMPPy               | 725.37   | 725.32   |
| APMPPPAPMPPy                            | 1315.66  | 1315.52  | PPPAPMPPy                   | 1016.53  | 1016.46  | APMPPyP              | 822.42   | 822.35   |
| PM                                      | 229.10   | 229.08   | PPPAPMPPyPA                 | 1184.62  | 1184.51  | APMPPyP              | 990.51   | 990.48   |
| PMP                                     | 326.15   | 326.18   | PPA                         | 266.15   | 266.13   | APMPPyP              | 1121.55  | 1121.48  |
| PMPP                                    | 423.21   | 432.19   | PPAP                        | 363.20   | 363.22   | APMPPyP              | 1218.60  | 1218.69  |
| PMPPPA                                  | 591.30   | 591.30   | PPAPM                       | 494.24   | 494.26   | APMPPyP              | 1315.66  | 1315.52  |
| PMPPPPAP                                | 688.35   | 688.32   | PPAPMP                      | 591.30   | 591.30   | PM                   | 229.10   | 229.08   |
| PMPPPPAPM                               | 819.39   | 819.36   | PPAPMPP                     | 688.35   | 688.32   | PMP                  | 326.15   | 326.18   |
| PMPPPPAPMP                              | 916.44   | 916.43   | PPAPMPPy                    | 919.47   | 919.42   | PMPP                 | 423.21   | 423.19   |
| PMPPPPAPMPPy                            | 1244.62  | 1244.59  | PPAPMPPyP                   | 1016.53  | 1016.46  | PMPPyPA              | 822.42   | 822.35   |
| MP                                      | 229.10   | 229.08   | PPAPMPPyPA                  | 1087.56  | 1087.50  | PMPPyP               | 919.47   | 919.42   |
| MPP                                     | 326.15   | 326.18   | PPAPMPPyP                   | 1184.62  | 1184.51  | PMPPyP               | 1050.51  | 1050.49  |
| MPPP                                    | 423.21   | 423.19   | PPAPMPPyP                   | 1315.66  | 1315.52  | PMPPyP               | 1147.57  | 1147.44  |
| MPPPA                                   | 494.24   | 494.26   | PAP                         | 266.15   | 266.13   | PMPPyP               | 1244.62  | 1244.59  |
| MPPPAP                                  | 591.30   | 591.30   | PAPM                        | 397.19   | 397.17   | MP                   | 229.10   | 229.08   |
| MPPPAPM                                 | 722.34   | 722.36   | PAPMP                       | 494.24   | 494.26   | MPP                  | 326.15   | 326.18   |
| MPPPAPMP                                | 819.39   | 819.36   | PAPMPP                      | 591.30   | 591.30   | MPPy                 | 557.28   | 557.53   |
| MPPPAPMPP                               | 916.44   | 916.43   | PAPMPPy                     | 822.42   | 822.35   | MPPyPA               | 725.37   | 725.42   |
| MPPPAPMPPy                              | 1147.57  | 1147.44  | PAPMPPyP                    | 919.47   | 919.42   | MPPyP                | 822.42   | 822.35   |
| y- b- cleavages (+1)                    | Expected | Observed | y- b- cleavages (+1)        | Expected | Observed | Miscellaneous Ions   | Expected | Observed |
| MPPyP                                   | 1050.51  | 1050.49  | yPAPMPPAPM                  | 1218.60  | 1218.69  | +1, -Prenyl          | 1344.65  | 1344.53  |
| MPPyP                                   | 1147.57  | 1147.44  | yPAPMPPAPMP                 | 1315.66  | 1315.52  | APMPPPAPMPPy -Prenyl | 1315.66  | 1315.52  |
| MPPyP                                   | 1244.62  | 1244.59  | PAP                         | 266.15   | 266.13   |                      |          |          |
| MPPyP                                   | 1315.66  | 1315.52  | PAPM                        | 397.19   | 397.17   |                      |          |          |
| PPy                                     | 426.24   | 426.29   | PAPMP                       | 494.24   | 494.26   |                      |          |          |
| PPyP                                    | 523.29   | 523.34   | PAPMPP                      | 591.30   | 591.30   |                      |          |          |
| PPyPA                                   | 594.33   | 594.35   | PAPMPPP                     | 688.35   | 688.32   |                      |          |          |
| PPyP                                    | 822.42   | 822.35   | PAPMPPPA                    | 759.39   | 759.31   |                      |          |          |
| PPyP                                    | 919.47   | 919.42   | PAPMPPAP                    | 856.44   | 856.39   |                      |          |          |
| PPyP                                    | 1016.53  | 1016.46  | PAPMPPAPM                   | 987.48   | 987.38   |                      |          |          |
| PPyP                                    | 1184.62  | 1184.51  | PAPMPPAPMP                  | 1084.53  | 1084.64  |                      |          |          |
| PyP                                     | 426.24   | 426.29   |                             |          |          |                      |          |          |
| PyP                                     | 594.33   | 594.35   | y- b- cleavages (+2)        |          |          |                      |          |          |
| PyP                                     | 725.37   | 725.42   | PMPPPAPMPP                  | 507.25   | 507.41   |                      |          |          |
| PyP                                     | 822.42   | 822.35   | APMPPPAPMPP                 | 542.77   | 542.73   |                      |          |          |
| PyP                                     | 919.47   | 919.42   | PPPAPMPPyPA                 | 592.81   | 592.62   |                      |          |          |
| PyP                                     | 1016.53  | 1016.46  | PPyPAPMPPAP                 | 641.34   | 641.54   |                      |          |          |
| PyP                                     | 1087.56  | 1087.50  |                             |          |          |                      |          |          |
| PyP                                     | 1184.62  | 1184.51  | Miscellaneous Ions          |          |          |                      |          |          |
| PyP                                     | 1315.66  | 1315.52  | PPPAPMPPyPA, -Prenyl, +2    | 607.30   | 607.41   |                      |          |          |
| yPAPMP                                  | 725.37   | 725.42   | +2 -Prenyl, -Methyl Sulfide | 648.83   | 648.90   |                      |          |          |
| yPAPMP                                  | 822.42   | 822.35   | +2, -Prenyl, -Acylium       | 658.83   | 658.66   |                      |          |          |
| yPAPMP                                  | 919.47   | 919.42   | +2, -Prenyl                 | 672.82   | 672.90   |                      |          |          |
| yPAPMP                                  | 990.51   | 990.48   | PPPAPMPPy -Prenyl           | 948.46   | 948.43   |                      |          |          |
| yPAPMP                                  | 1087.56  | 1087.50  | PPPAPMPPyPA -Prenyl         | 1116.55  | 1116.45  |                      |          |          |



(m) FT-ICR data showing ion whose mass (+/- 2 ppm) corresponds to singly prenylated cyclo[APMPPYPAPMPPYP]

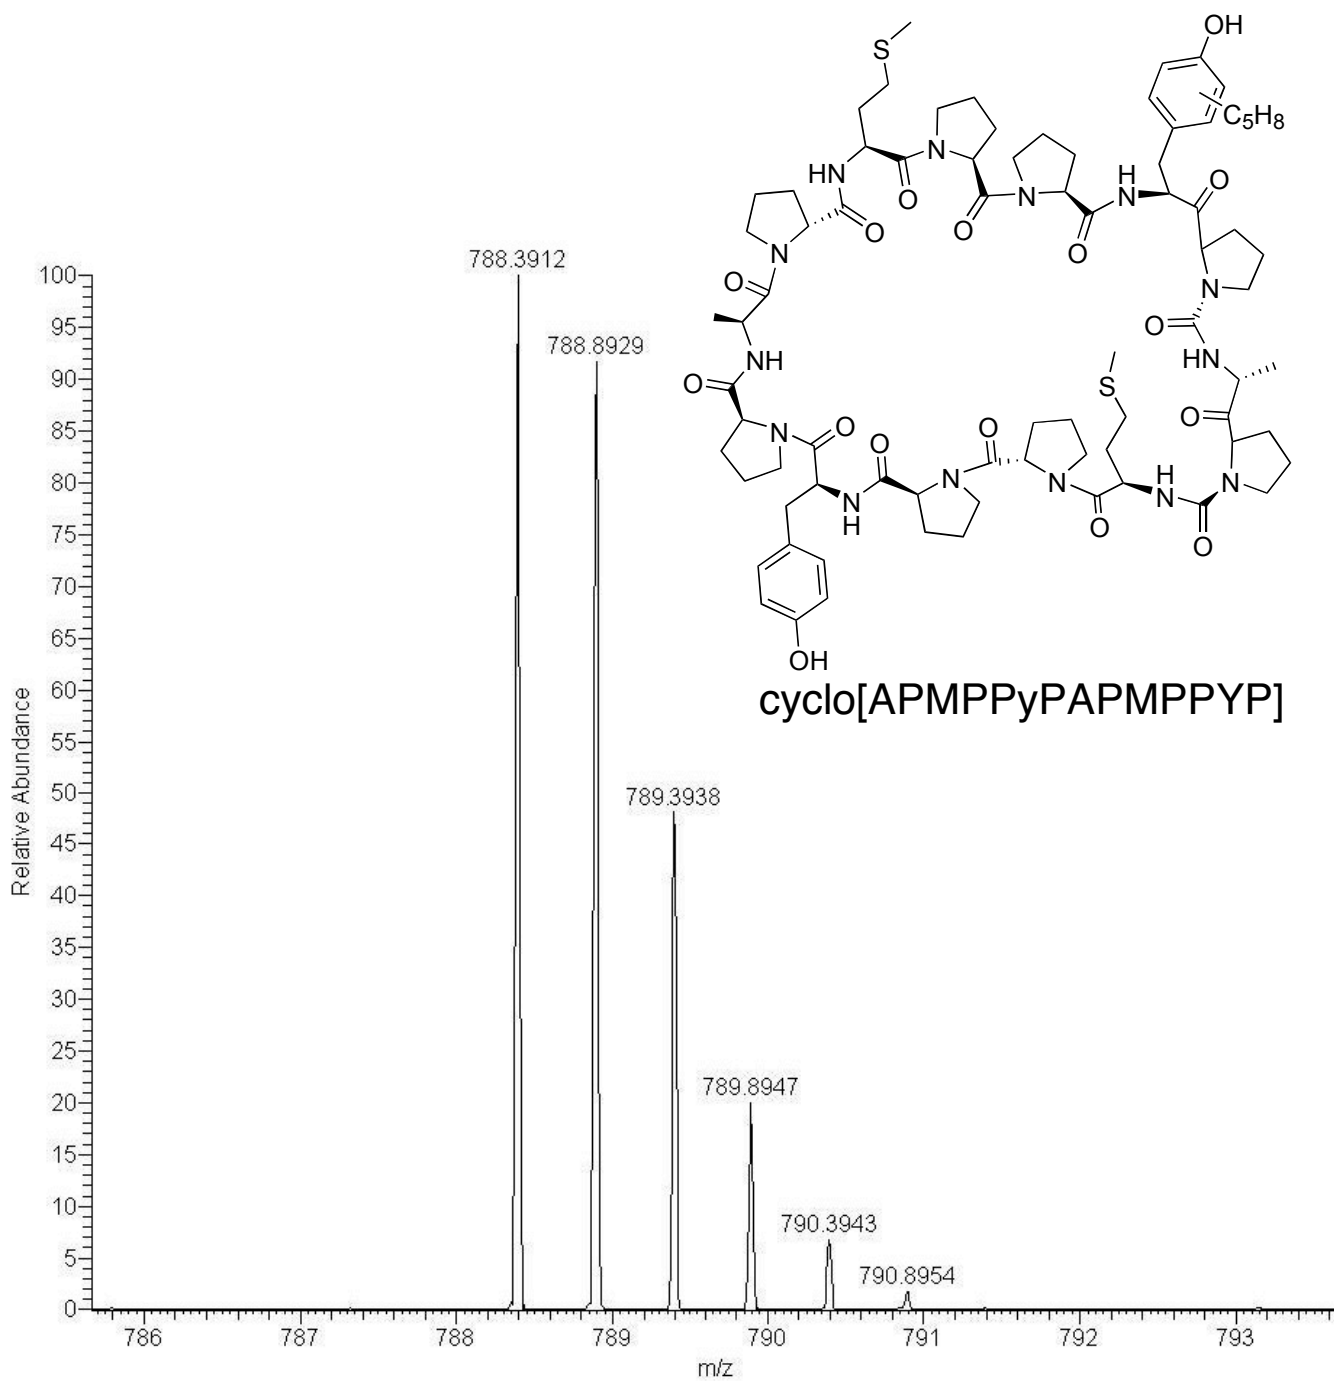

(n) LC-FT-ICR chromatogram selected for mass of singly prenylated cyclo[APMPPYPAPMPPYP]

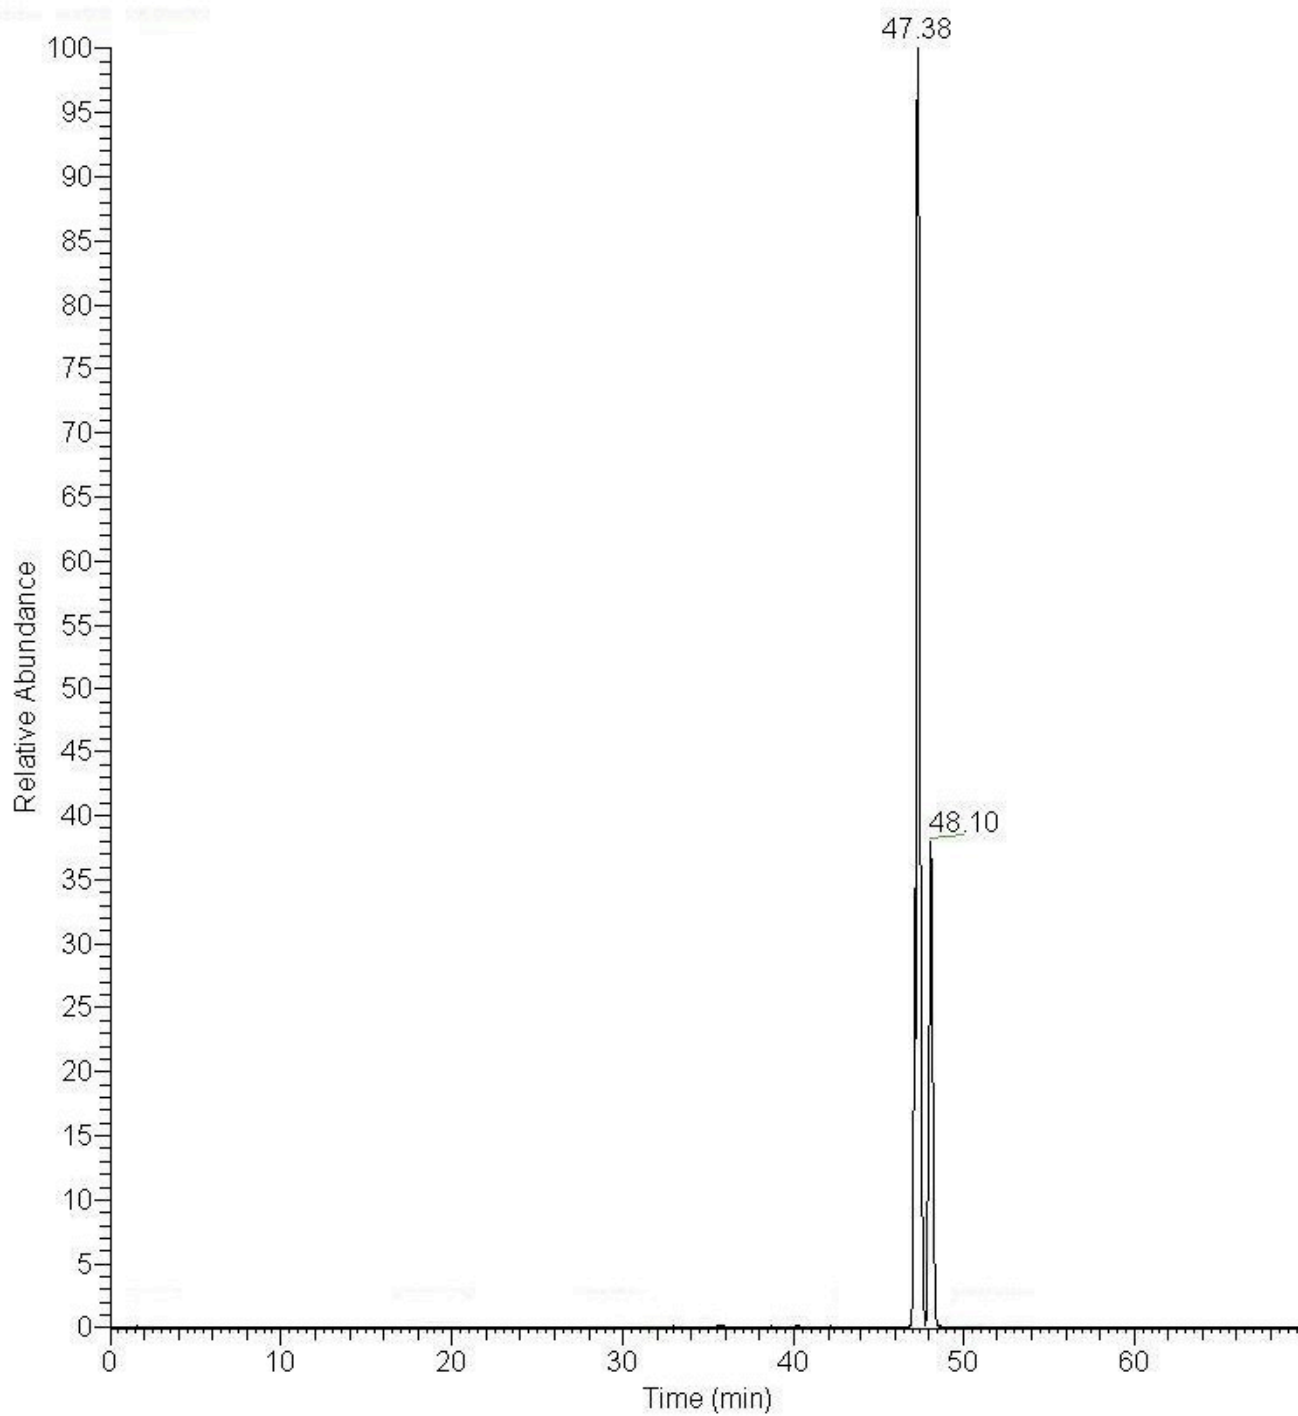

(o) MS-MS spectra for early (top) and late (bottom) eluting singly prenylated products of the reaction of LynF with cyclo[APMPYPAPMPYP] (see chromatogram on previous page)

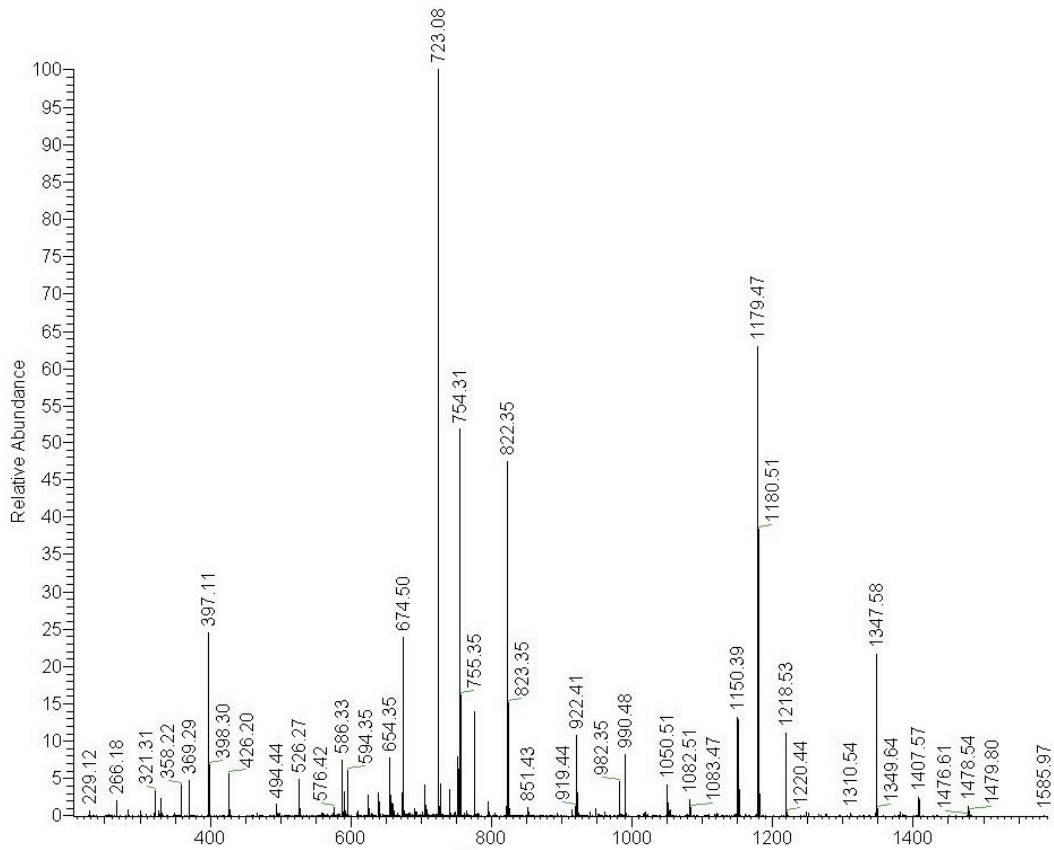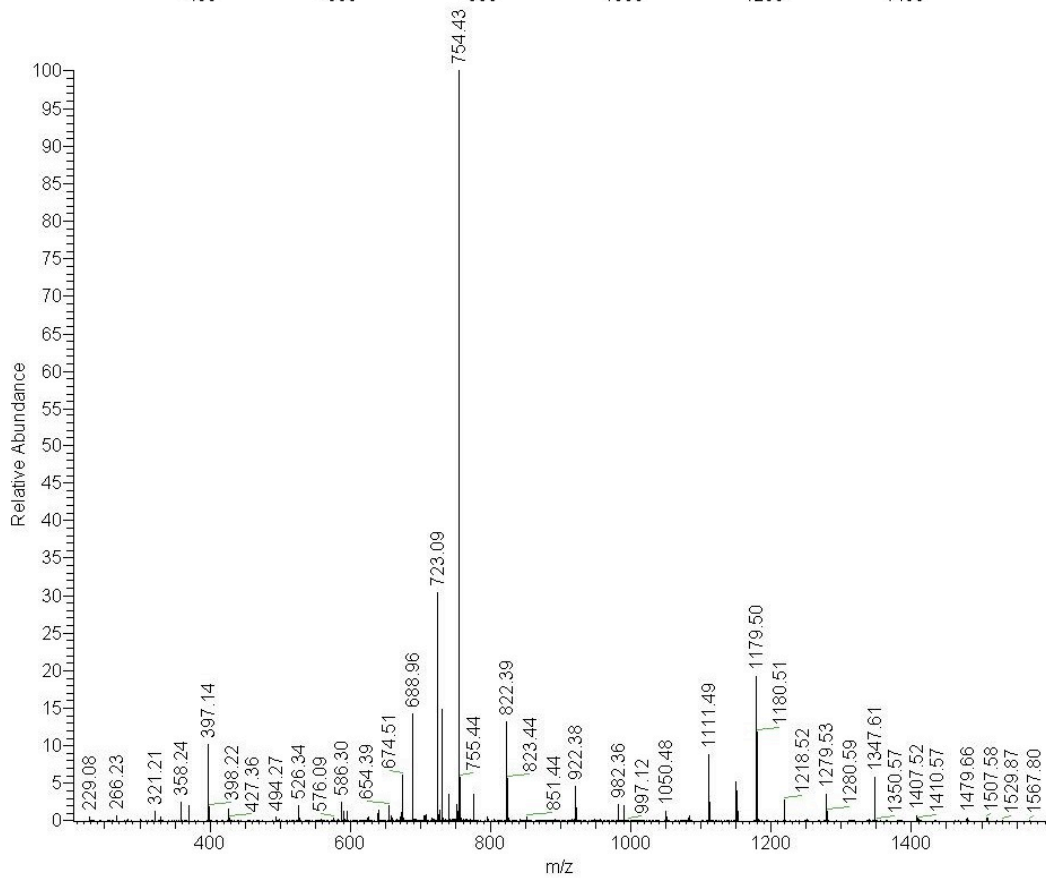

(p) MS-MS assignments for singly prenylated cyclo[APMPPYPAPMPPYP] early (this page) and late (next page) eluting isomers

| cyclo[APMPPYPAPMPPYP] 1st peak (C-prenyl) |          |          |                      |          |          |                      |          |          |
|-------------------------------------------|----------|----------|----------------------|----------|----------|----------------------|----------|----------|
| y- b- cleavages (+1)                      | Expected | Observed | y- b- cleavages (+1) | Expected | Observed | y- b- cleavages (+1) | Expected | Observed |
| APMP                                      | 397.19   | 397.11   | MPPYPAPMPPyPA        | 1478.72  | 1478.54  | PAPMPPyP             | 919.47   | 919.44   |
| APMPP                                     | 494.24   | 494.44   | PPY                  | 358.18   | 358.22   | PAPMPPyPA            | 990.51   | 990.48   |
| APMPPYP                                   | 754.36   | 754.31   | PPYPA                | 526.27   | 526.27   | PAPMPPyPAPM          | 1218.60  | 1218.53  |
| APMPPYPAP                                 | 922.45   | 922.41   | PPYPAP               | 623.32   | 623.26   | APMP                 | 397.19   | 397.11   |
| APMPPYPAPMP                               | 1150.54  | 1150.39  | PPYPAPM              | 754.36   | 754.31   | APMPP                | 494.24   | 494.44   |
| APMPPYPAPMPP                              | 1247.60  | 1247.45  | PPYPAPMP             | 851.41   | 851.43   | APMPPyP              | 822.42   | 822.35   |
| APMPPYPAPMPPy                             | 1478.72  | 1478.54  | PPYPAPMPP            | 948.47   | 948.45   | APMPPyPA             | 893.46   | 893.51   |
| PM                                        | 229.10   | 229.12   | PPYPAPMPPy           | 1179.59  | 1179.47  | APMPPyPAP            | 990.51   | 990.48   |
| PMP                                       | 326.15   | 326.25   | PPYPAPMPPyPA         | 1347.68  | 1347.58  | APMPPyPAPM           | 1121.55  | 1121.39  |
| PMPPY                                     | 586.27   | 586.33   | PYP                  | 358.18   | 358.22   | APMPPyPAPMP          | 1218.60  | 1218.53  |
| PMPPPY                                    | 683.32   | 683.39   | PYPAP                | 526.27   | 526.27   | APMPPyPAPMPPY        | 1478.72  | 1478.54  |
| PMPPPYPA                                  | 754.36   | 754.31   | PYPAPMP              | 754.36   | 754.31   | PM                   | 229.10   | 229.12   |
| PMPPPYPAP                                 | 851.41   | 851.43   | PYPAPMPP             | 851.41   | 851.43   | PMP                  | 326.15   | 326.25   |
| PMPPPYPAPM                                | 982.45   | 982.35   | PYPAPMPPy            | 1082.54  | 1082.51  | PMPPy                | 654.33   | 654.35   |
| PMPPPYPAPMP                               | 1079.51  | 1079.44  | PYPAPMPPyP           | 1179.59  | 1179.47  | PMPPyPA              | 822.42   | 822.35   |
| PMPPPYPAPMPPy                             | 1407.68  | 1407.57  | PYPAPMPPyPAP         | 1347.68  | 1347.58  | PMPPyPAP             | 919.47   | 919.44   |
| MP                                        | 229.10   | 229.12   | PYPAPMPPyPAPM        | 1478.72  | 1478.54  | PMPPyPAPM            | 1050.51  | 1050.51  |
| MPP                                       | 326.15   | 326.25   | YPAPMPP              | 754.36   | 754.31   | PMPPyPAPMP           | 1147.57  | 1147.53  |
| MPPYP                                     | 586.27   | 586.33   | YPAPMPPy             | 985.48   | 985.32   | PMPPyPAPMPPY         | 1407.68  | 1407.57  |
| MPPYPAP                                   | 754.36   | 754.31   | YPAPMPPyP            | 1082.54  | 1082.51  | MP                   | 229.10   | 229.12   |
| MPPYPAPMP                                 | 982.45   | 982.35   | YPAPMPPyPAPMP        | 1478.72  | 1478.54  | MPP                  | 326.15   | 326.25   |
| MPPYPAPMPP                                | 1079.51  | 1079.44  | PAP                  | 266.15   | 266.18   | MPPyP                | 654.33   | 654.35   |
| MPPYPAPMPPy                               | 1310.63  | 1310.53  | PAPM                 | 397.19   | 397.11   | MPPyPAP              | 822.42   | 822.35   |
| MPPYPAPMPPyP                              | 1407.68  | 1407.57  | PAPMP                | 494.24   | 494.44   | MPPyPAPM             | 953.46   | 953.57   |
| MPPYPAPMPPyPA                             | 1478.72  | 1478.54  | PAPMPPy              | 822.42   | 822.35   | MPPyPAPMP            | 1050.51  | 1050.51  |
| y- b- cleavages (+1)                      | Expected | Observed | y- b- cleavages (+1) | Expected | Observed |                      |          |          |
| MPPyPAPMPP                                | 1147.57  | 1147.33  | PAPMP                | 494.24   | 494.44   |                      |          |          |
| MPPyPAPMPPY                               | 1310.63  | 1310.54  | PAPMPPY              | 754.36   | 754.31   |                      |          |          |
| MPPyPAPMPPYP                              | 1407.68  | 1407.57  | PAPMPPYP             | 851.41   | 851.43   |                      |          |          |
| MPPyPAPMPPYPA                             | 1478.72  | 1478.54  | PAPMPPYPA            | 922.45   | 922.41   |                      |          |          |
| PPy                                       | 426.24   | 426.20   | PAPMPPYPAP           | 1019.50  | 1019.39  |                      |          |          |
| PPyPA                                     | 594.33   | 594.35   | PAPMPPYPAPM          | 1150.54  | 1150.39  |                      |          |          |
| PPyPAPM                                   | 822.42   | 822.35   | PAPMPPYPAPMP         | 1247.60  | 1247.45  |                      |          |          |
| PPyPAPMP                                  | 919.47   | 919.44   |                      |          |          |                      |          |          |
| PPyPAPMPP                                 | 1016.53  | 1016.55  | y- b- cleavages (+2) |          |          |                      |          |          |
| PPyPAPMPPY                                | 1179.59  | 1179.47  | PPYPAPMPPyPAP        | 722.87   | 723.08   |                      |          |          |
| PPyPAPMPPYPA                              | 1347.68  | 1347.58  | PMPPPYPAPMPPy        | 704.35   | 704.36   |                      |          |          |
| PyP                                       | 426.24   | 426.20   | PyPAPMPPYPAP         | 674.34   | 674.50   |                      |          |          |
| PyPAP                                     | 594.33   | 594.35   | PPYPAPMPPYP          | 638.82   | 638.82   |                      |          |          |
| PyPAPM                                    | 725.37   | 725.31   | PAPMPPYPAPMP         | 624.30   | 624.46   |                      |          |          |
| PyPAPMP                                   | 822.42   | 822.35   |                      |          |          |                      |          |          |
| PyPAPMPP                                  | 919.47   | 919.44   | Miscellaneous Ions   |          |          |                      |          |          |
| PyPAPMPPY                                 | 1082.54  | 1082.51  | PAPM y- a- cleavage  | 369.20   | 329.29   |                      |          |          |
| PyPAPMPPYP                                | 1179.59  | 1179.47  | PAPM -Met sidechain  | 321.16   | 321.31   |                      |          |          |
| PyPAPMPPYPAP                              | 1347.68  | 1347.58  |                      |          |          |                      |          |          |
| PyPAPMPPYPAPM                             | 1478.72  | 1478.54  |                      |          |          |                      |          |          |
| yPAPMPP                                   | 822.42   | 822.35   |                      |          |          |                      |          |          |
| yPAPMPPYP                                 | 1082.54  | 1082.51  |                      |          |          |                      |          |          |
| yPAPMPPYPAPMP                             | 1478.72  | 1478.54  |                      |          |          |                      |          |          |
| PAP                                       | 266.15   | 266.18   |                      |          |          |                      |          |          |
| PAPM                                      | 397.19   | 397.11   |                      |          |          |                      |          |          |

| cyclo[APMPPYPAPMPPYP] 2nd peak (O-prenyl) |          |          |                         |          |          |                      |          |          |  |
|-------------------------------------------|----------|----------|-------------------------|----------|----------|----------------------|----------|----------|--|
| y- b- cleavages (+1)                      | Expected | Observed | y- b- cleavages (+1)    | Expected | Observed | y- b- cleavages (+1) | Expected | Observed |  |
| APM                                       | 300.14   | 299.94   | PPYP                    | 455.23   | 455.40   | YPAPMPPyPAPM         | 1,381.67 | 1,381.54 |  |
| APMP                                      | 397.19   | 397.14   | PPYPA                   | 526.27   | 526.33   | YPAPMPPyPAPMP        | 1,478.72 | 1,478.47 |  |
| APMPP                                     | 494.24   | 494.28   | PPYPAP                  | 623.32   | 623.43   | PAP                  | 266.15   | 266.23   |  |
| APMPPYP                                   | 754.36   | 754.43   | PPYPAPM                 | 754.36   | 754.43   | PAPM                 | 397.19   | 397.14   |  |
| APMPPYPAP                                 | 922.45   | 922.38   | PPYPAPMP                | 851.41   | 851.42   | PAPMP                | 494.24   | 494.28   |  |
| APMPPYPAPMP                               | 1,150.54 | 1,150.45 | PPYPAPMPP               | 948.47   | 948.54   | PAPMPPy              | 822.42   | 822.39   |  |
| APMPPYPAPMPP                              | 1,247.60 | 1,247.60 | PPYPAPMPPy              | 1,179.59 | 1,179.49 | PAPMPPyPA            | 990.51   | 990.48   |  |
| APMPPYPAPMPPy                             | 1,478.72 | 1,478.47 | PPYPAPMPPyP             | 1,276.64 | 1,276.48 | PAPMPPyPAPM          | 1,218.60 | 1,218.51 |  |
| PM                                        | 229.10   | 229.08   | PPYPAPMPPyPA            | 1,347.68 | 1,347.60 | APM                  | 300.14   | 299.94   |  |
| PMPPY                                     | 586.27   | 586.30   | PYP                     | 358.18   | 358.23   | APMP                 | 397.19   | 397.14   |  |
| PMPPYP                                    | 683.32   | 683.13   | PYPA                    | 429.21   | 429.36   | APMPP                | 494.24   | 494.28   |  |
| PMPPYPA                                   | 754.36   | 754.43   | PYPAP                   | 526.27   | 526.33   | APMPPyP              | 822.42   | 822.39   |  |
| PMPPYPAP                                  | 851.41   | 851.42   | PYPAPMP                 | 754.36   | 754.43   | APMPPyPAP            | 990.51   | 990.48   |  |
| PMPPYPAPM                                 | 982.45   | 982.37   | PYPAPMPP                | 851.41   | 851.42   | APMPPyPAPM           | 1,121.55 | 1,121.51 |  |
| PMPPYPAPMP                                | 1,079.51 | 1,079.40 | PYPAPMPPy               | 1,082.54 | 1,082.45 | APMPPyPAPMP          | 1,218.60 | 1,218.51 |  |
| PMPPYPAPMPPy                              | 1,407.68 | 1,407.52 | PYPAPMPPyP              | 1,179.59 | 1,179.49 | APMPPyPAPMPP         | 1,315.66 | 1,315.55 |  |
| MP                                        | 229.10   | 229.08   | PYPAPMPPyPA             | 1,250.63 | 1,250.73 | APMPPyPAPMPPy        | 1,478.72 | 1,478.47 |  |
| MPPYP                                     | 586.27   | 586.30   | PYPAPMPPyPAP            | 1,347.68 | 1,347.60 | PM                   | 229.10   | 229.08   |  |
| MPPYPAP                                   | 754.36   | 754.43   | PYPAPMPPyPAPM           | 1,478.72 | 1,478.47 | PMPPy                | 654.33   | 654.38   |  |
| MPPYPAPMP                                 | 982.45   | 982.37   | YPA                     | 332.16   | 332.38   | PMPPyPA              | 822.42   | 822.39   |  |
| MPPYPAPMPP                                | 1,079.51 | 1,079.40 | YPAP                    | 429.21   | 429.36   | PMPPyPAPM            | 1,050.51 | 1,050.47 |  |
| MPPYPAPMPPy                               | 1,310.63 | 1,310.66 | YPAPMPP                 | 754.36   | 754.43   | PMPPyPAPMP           | 1,147.57 | 1,147.46 |  |
| MPPYPAPMPPyP                              | 1,407.68 | 1,407.60 | YPAPMPPyP               | 1,082.54 | 1,082.45 | PMPPyPAPMPPY         | 1,407.68 | 1,407.52 |  |
| MPPYPAPMPPyPA                             | 1,478.72 | 1,478.47 | YPAPMPPyPA              | 1,153.57 | 1,153.43 | MP                   | 229.10   | 229.08   |  |
| PPY                                       | 358.18   | 358.23   | YPAPMPPyPAP             | 1,250.63 | 1,250.73 | MPPy                 | 557.28   | 557.92   |  |
| y- b- cleavages (+1)                      | Expected | Observed | y- b- cleavages (+1)    | Expected | Observed |                      |          |          |  |
| MPPyP                                     | 654.33   | 654.38   | PAP                     | 266.15   | 266.23   |                      |          |          |  |
| MPPyPAP                                   | 822.42   | 822.39   | PAPM                    | 397.19   | 397.14   |                      |          |          |  |
| MPPyPAPMP                                 | 1,050.51 | 1,050.47 | PAPMP                   | 494.24   | 494.28   |                      |          |          |  |
| MPPyPAPMPP                                | 1,147.57 | 1,147.46 | PAPMPPY                 | 754.36   | 754.43   |                      |          |          |  |
| MPPyPAPMPPy                               | 1,310.63 | 1,310.66 | PAPMPPyP                | 851.41   | 851.42   |                      |          |          |  |
| MPPyPAPMPPyP                              | 1,407.68 | 1,407.52 | PAPMPPyPA               | 922.45   | 922.38   |                      |          |          |  |
| MPPyPAPMPPyPA                             | 1,478.72 | 1,478.47 | PAPMPPyPAPM             | 1,150.54 | 1,150.45 |                      |          |          |  |
| PPy                                       | 426.24   | 426.23   | PAPMPPyPAPMP            | 1,247.60 | 1,247.60 |                      |          |          |  |
| PPyPA                                     | 594.33   | 594.29   |                         |          |          |                      |          |          |  |
| PPyPAPM                                   | 822.42   | 822.39   | y- b- cleavages (+2)    |          |          |                      |          |          |  |
| PPyPAPMPPY                                | 1,179.59 | 1,179.49 | MPPYAPMPPyPA            | 739.86   | 739.82   |                      |          |          |  |
| PPyPAPMPPyPA                              | 1,347.68 | 1,347.60 | PMPPYAPMPPy             | 704.34   | 704.32   |                      |          |          |  |
| PyP                                       | 426.24   | 426.23   | MPPYAPMPP               | 540.26   | 540.27   |                      |          |          |  |
| PyPAP                                     | 594.33   | 594.29   |                         |          |          |                      |          |          |  |
| PyPAPMP                                   | 822.42   | 822.39   | Miscellaneous Ions      |          |          |                      |          |          |  |
| PyPAPMPPY                                 | 1,082.54 | 1,082.45 | PyPAPMPPYAP +2          | 674.34   | 674.51   |                      |          |          |  |
| PyPAPMPPyP                                | 1,179.59 | 1,179.49 | PPyPAPMPPYAP -prenyl +2 | 688.84   | 688.96   |                      |          |          |  |
| PyPAPMPPyPA                               | 1,250.63 | 1,250.73 | PPyPAPMPPYAP +2         | 722.87   | 723.08   |                      |          |          |  |
| PyPAPMPPyPAP                              | 1,347.68 | 1,347.60 | PYPAPMPPY -prenyl +1    | 1,111.53 | 1,111.48 |                      |          |          |  |
| PyPAPMPPyPAPM                             | 1,478.72 | 1,478.47 | APMPPYAPMP -prenyl +1   | 1,150.54 | 1,150.45 |                      |          |          |  |
| yPAPMPP                                   | 822.42   | 822.39   | PPYAPMPPyPAP -prenyl +1 | 1,279.62 | 1,279.54 |                      |          |          |  |
| yPAPMPPyP                                 | 1,082.54 | 1,082.45 |                         |          |          |                      |          |          |  |
| yPAPMPPyPAP                               | 1,250.63 | 1,250.73 |                         |          |          |                      |          |          |  |
| yPAPMPPyPAPM                              | 1,381.67 | 1,381.54 |                         |          |          |                      |          |          |  |
| yPAPMPPyPAPMP                             | 1,478.72 | 1,478.47 |                         |          |          |                      |          |          |  |

(q) FT-ICR data showing ion whose mass (+/- 2ppm) corresponds to doubly prenylated cyclo[APMPPYPAPMPPYP]

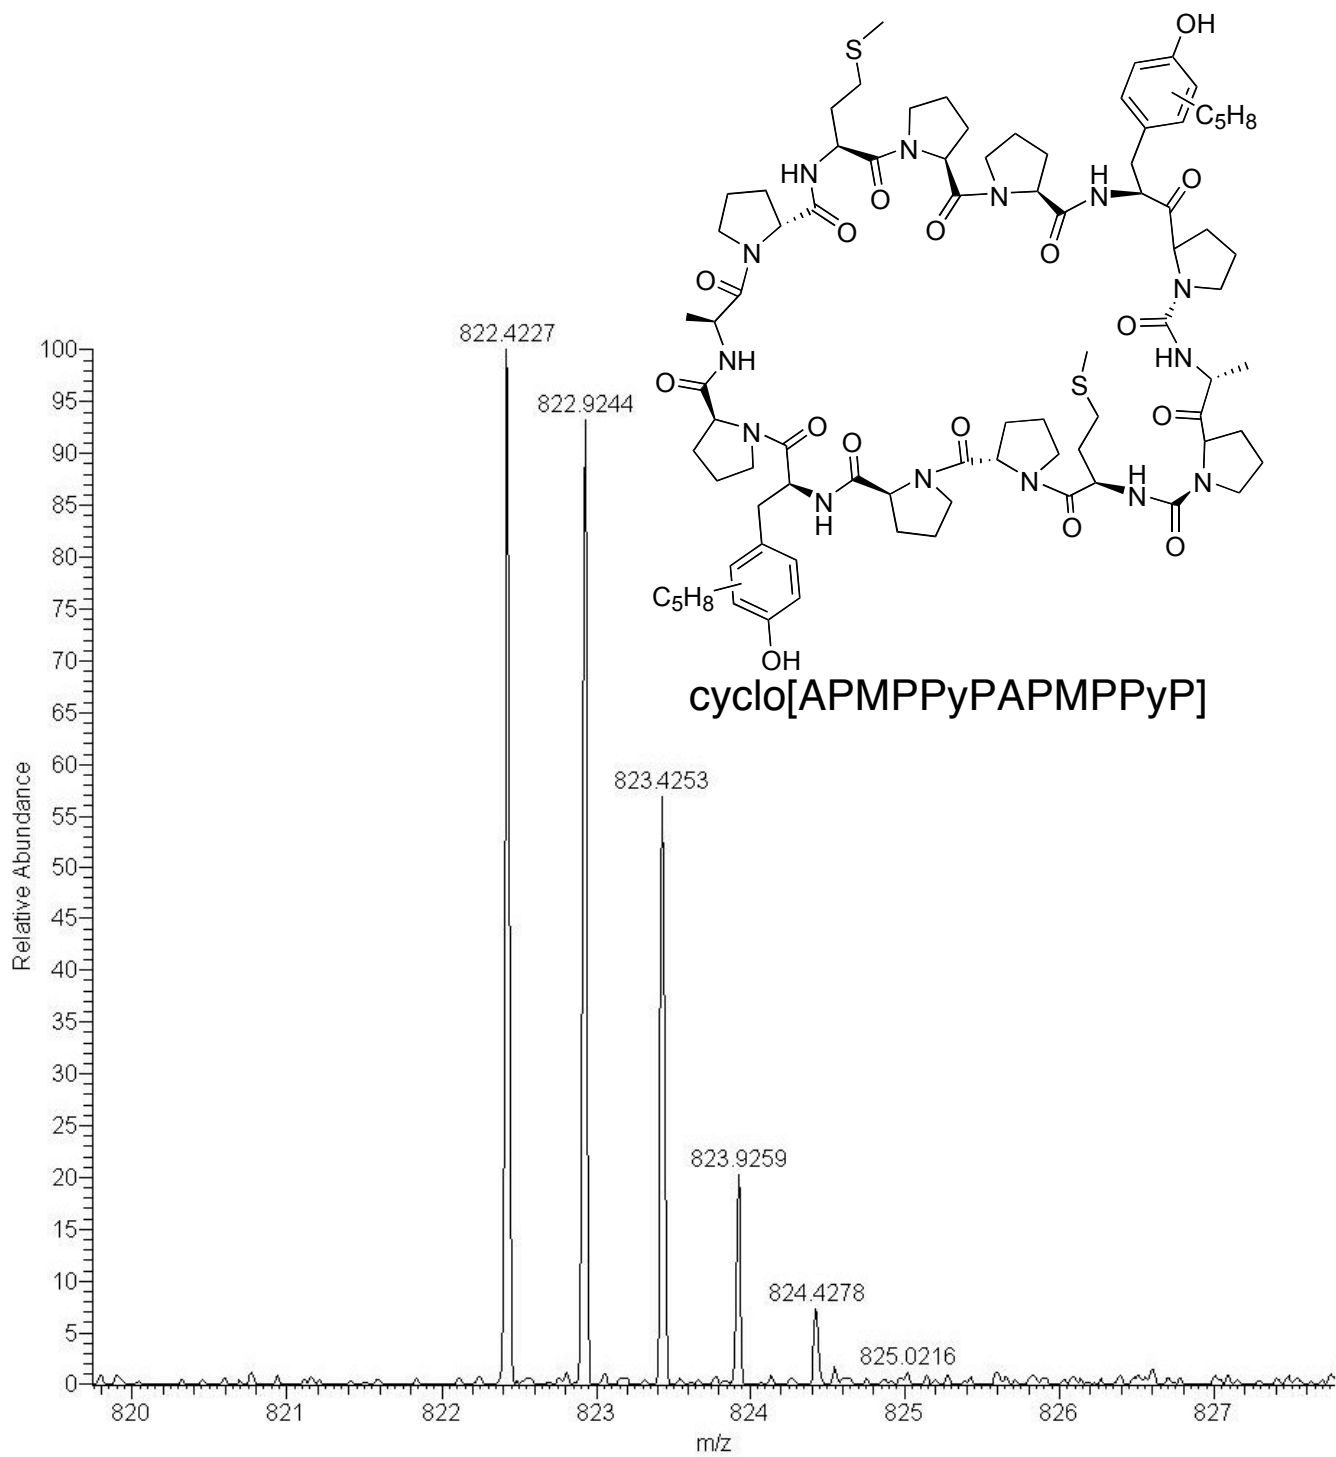

(r) LC-FT-ICR chromatogram selected for mass of doubly prenylated cyclo[APMPPYPAPMPPYP]

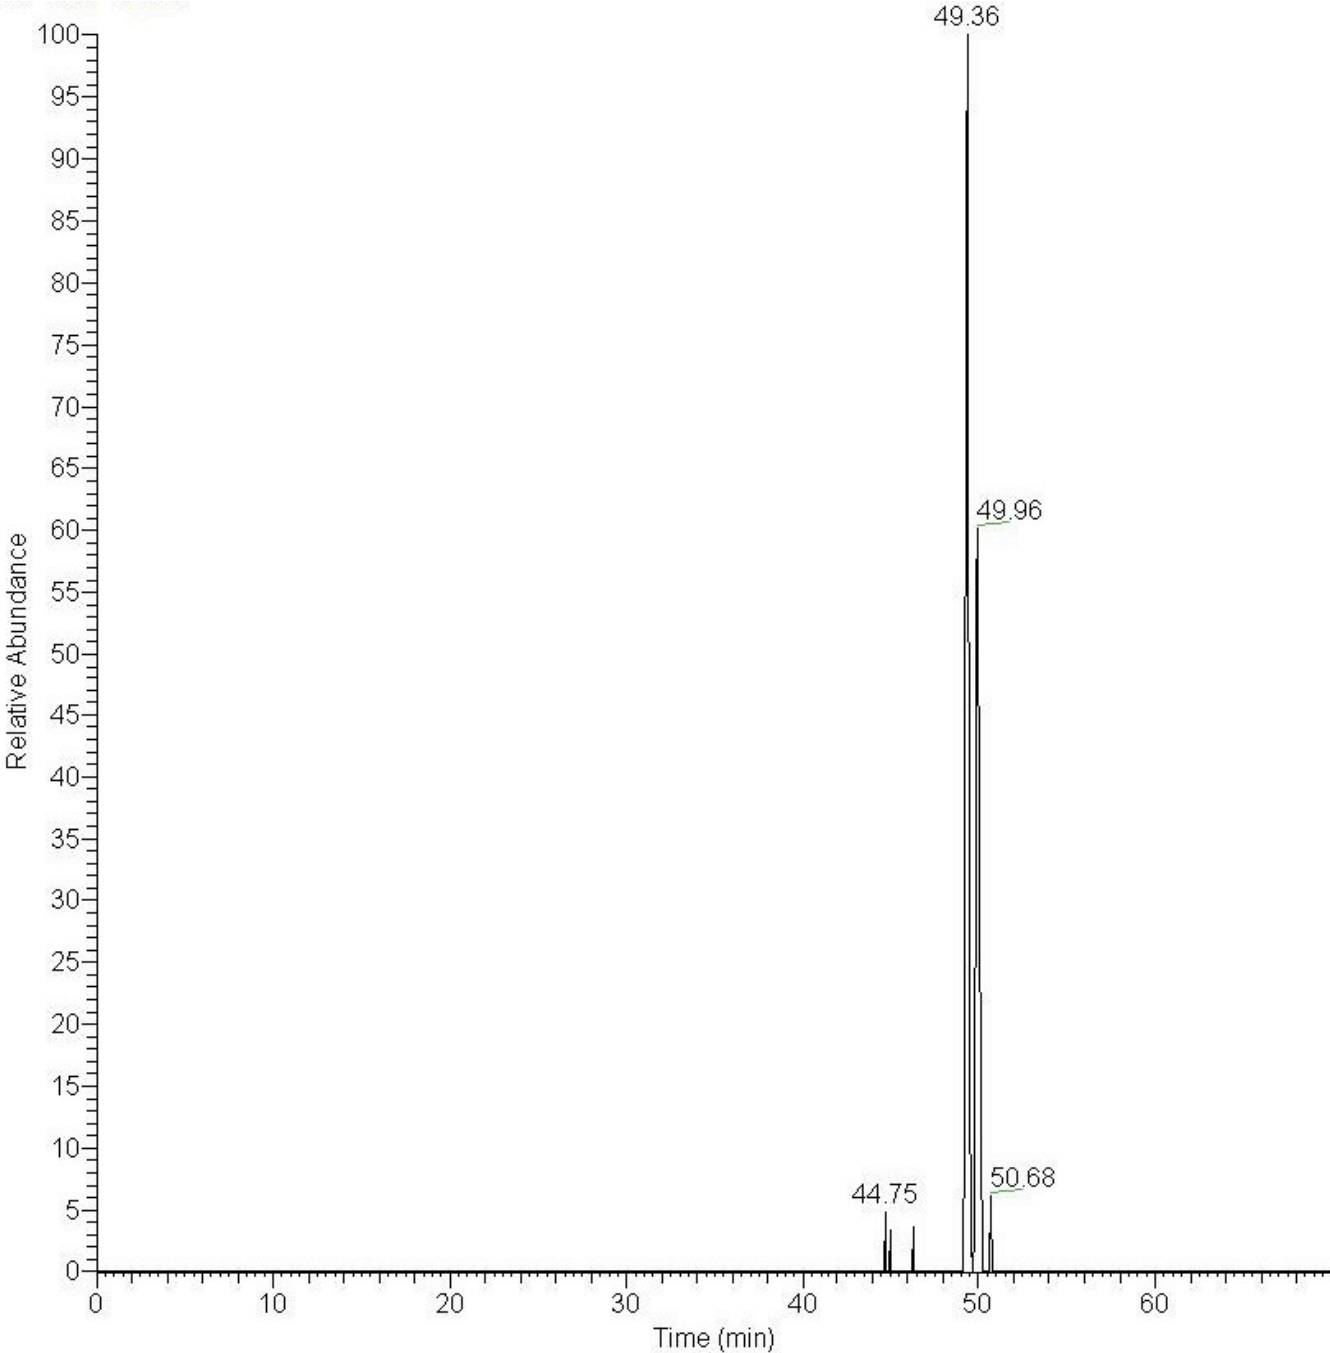

(s) MS-MS spectra for early (top) and late (bottom) eluting doubly prenylated products of the reaction of LynF with cyclo[APMPYPAPMPYP] (see chromatogram on previous page)

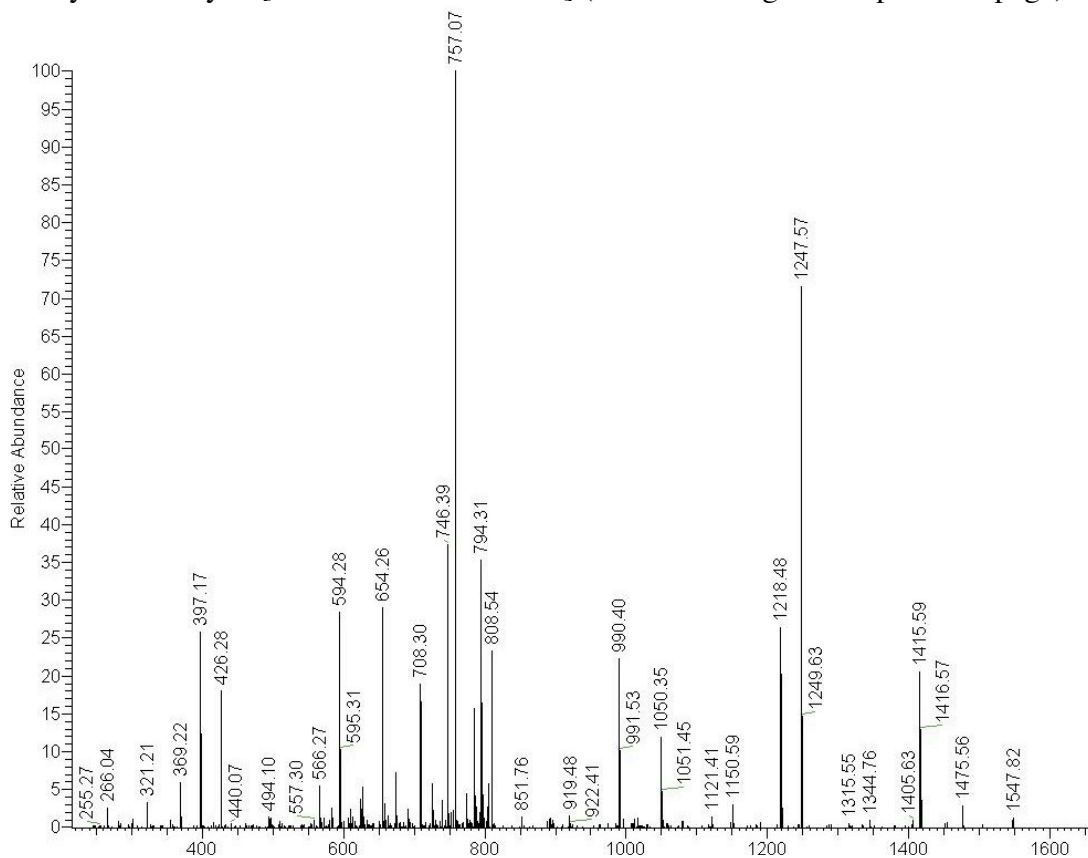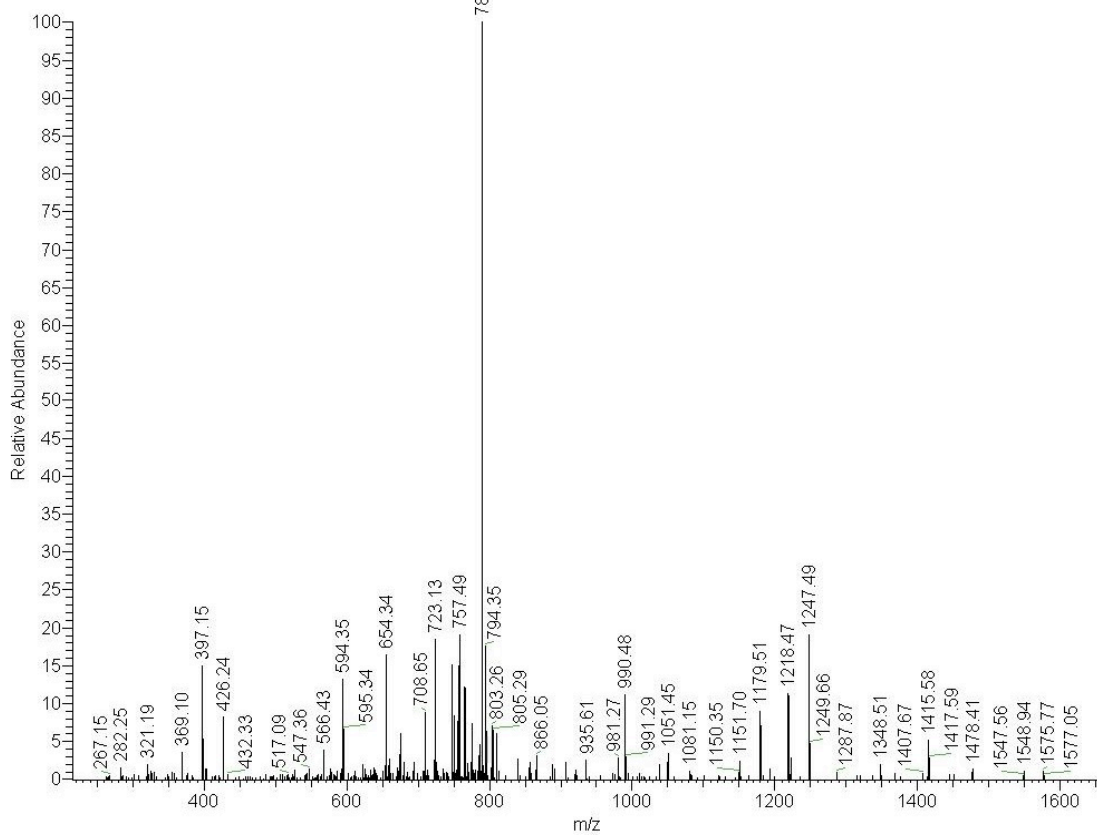



(t) MS-MS assignments for doubly prenylated cyclo[APMPPYPAPMPPYP] early (top) and late (bottom) eluting isomers

| cyclo[APMPPYPAPMPPYP] 1st peak |          |          |                      |          |          |                        |          |          |
|--------------------------------|----------|----------|----------------------|----------|----------|------------------------|----------|----------|
| y- b- cleavages (+1)           | Expected | Observed | y- b- cleavages (+1) | Expected | Observed | y- b- cleavages (+1)   | Expected | Observed |
| APMP                           | 397.19   | 397.17   | PPyPAPMPP            | 1016.53  | 1016.45  | PAPMPPYPAPMP           | 1315.66  | 1315.55  |
| APMPPy                         | 725.37   | 725.40   | PPyPAPMPPy           | 1247.66  | 1247.57  |                        |          |          |
| APMPPyPAP                      | 990.51   | 990.40   | PPyPAPMPPyP          | 1344.71  | 1344.76  | y- b- cleavage (+2)    |          |          |
| APMPPyPAPM                     | 1121.55  | 1121.41  | PPyPAPMPPyPA         | 1415.75  | 1415.59  | PPyPAPMPPyPAP          | 756.90   | 757.07   |
| APMPPyPAPMP                    | 1218.60  | 1218.48  | PyP                  | 426.24   | 426.28   | PyPAPMPPyPAP           | 708.38   | 708.30   |
| APMPPyPAPMPP                   | 1315.66  | 1315.55  | PyPA                 | 497.27   | 497.35   | PPyPAPMPPyP            | 672.35   | 672.83   |
| APMPPyPAPMPPy                  | 1546.79  | 1546.40  | PyPAP                | 594.33   | 594.28   | APMPPyPAPMPP           | 657.83   | 658.47   |
| PMP                            | 326.15   | 326.18   | PyPAPM               | 725.37   | 725.40   | PyPAPMPPyP             | 623.83   | 624.14   |
| PMPP                           | 423.21   | 423.13   | PyPAPMPP             | 919.47   | 919.48   | APMPPyPAPMP            | 609.30   | 609.98   |
| PMPPy                          | 654.33   | 654.26   | PyPAPMPPy            | 1150.61  | 1150.59  |                        |          |          |
| PMPPyPAP                       | 919.47   | 919.48   | PyPAPMPPyP           | 1247.66  | 1247.57  | Miscellaneous Ions     |          |          |
| PMPPyPAPM                      | 1050.51  | 1050.35  | PyPAPMPPyPAP         | 1415.75  | 1415.59  | PAPM -Met sidechain    | 321.16   | 321.21   |
| PMPPyPAPMP                     | 1147.57  | 1147.56  | PyPAPMPPyPAPM        | 1546.79  | 1546.40  | PAPM y- a- cleavage    | 369.20   | 369.22   |
| PMPPyPAPMPPy                   | 1475.75  | 1475.56  | yPAP                 | 497.27   | 497.35   | PyPAP y- a- cleavage   | 566.33   | 566.27   |
| MPP                            | 326.15   | 326.18   | yPAPMP               | 725.37   | 725.40   | PMPPyPA -Met sidechain | 746.39   | 746.39   |
| MPPy                           | 557.28   | 557.30   | yPAPMPPyP            | 1150.61  | 1150.59  | APMPPyP y- a- cleavage | 794.43   | 794.31   |
| MPPyP                          | 654.33   | 654.26   | yPAPMPPyPA           | 1221.64  | 1221.67  |                        |          |          |
| MPPyPA                         | 725.37   | 725.40   | yPAPMPPyPAPMP        | 1546.79  | 1546.40  |                        |          |          |
| MPPyPAPMP                      | 1050.51  | 1050.35  | PAP                  | 266.15   | 266.04   |                        |          |          |
| MPPyPAPMPP                     | 1147.57  | 1147.56  | PAPM                 | 397.19   | 397.17   |                        |          |          |
| MPPyPAPMPPyP                   | 1475.75  | 1475.56  | PAPMP                | 494.24   | 494.10   |                        |          |          |
| PPy                            | 426.24   | 426.28   | PAPMPPyP             | 919.47   | 919.48   |                        |          |          |
| PPyPA                          | 594.33   | 594.28   | PAPMPPyPA            | 990.51   | 990.40   |                        |          |          |
| PPyPAP                         | 691.38   | 691.16   | PAPMPPyPAP           | 1087.56  | 1087.74  |                        |          |          |
| PPyPAPMP                       | 919.47   | 919.48   | PAPMPPyPAPM          | 1218.60  | 1218.48  |                        |          |          |

| cyclo[APMPPYPAPMPPYP] 2nd peak |          |          |                        |          |          |                           |          |          |
|--------------------------------|----------|----------|------------------------|----------|----------|---------------------------|----------|----------|
| y- b- cleavages (+1)           | Expected | Observed | y- b- cleavages (+1)   | Expected | Observed | Miscellaneous Ions        | Expected | Observed |
| APMP                           | 397.19   | 397.17   | PyPAP                  | 594.33   | 594.34   | PPyPAPMPPyPAP -prenyl, +2 | 722.87   | 723.13   |
| APMPPy                         | 725.37   | 725.38   | PyPAPM                 | 725.37   | 725.38   | All, -prenyl, +2          | 788.39   | 788.45   |
| APMPPyPAP                      | 990.51   | 990.52   | PyPAPMPP               | 919.47   | 919.49   | PPyPAPMPPy, -prenyl +1    | 1179.59  | 1179.53  |
| APMPPyPAPM                     | 1121.55  | 1121.56  | PyPAPMPPy              | 1150.61  | 1150.46  | PPyPAPMPPyPA, -prenyl +1  | 1347.68  | 1347.65  |
| APMPPyPAPMP                    | 1218.60  | 1218.43  | PyPAPMPPyP             | 1247.66  | 1247.55  | PyPAPMPPyPAP -prenyl +2   | 674.34   | 674.55   |
| APMPPyPAPMPP                   | 1315.66  | 1315.68  | PyPAPMPPyPAP           | 1415.75  | 1415.75  |                           |          |          |
| PMPP                           | 423.21   | 423.26   | yPAPMP                 | 725.37   | 725.38   |                           |          |          |
| PMPPy                          | 654.33   | 654.38   | yPAPMPPyP              | 1150.61  | 1150.46  |                           |          |          |
| PMPPyPAP                       | 919.47   | 919.49   | PAP                    | 266.15   | 266.10   |                           |          |          |
| PMPPyPAPM                      | 1050.51  | 1050.51  | PAPM                   | 397.19   | 397.17   |                           |          |          |
| PMPPyPAPMPPy                   | 1475.75  | 1475.66  | PAPMPPyP               | 919.47   | 919.49   |                           |          |          |
| MPPy                           | 557.28   | 557.38   | PAPMPPyPA              | 990.51   | 990.52   |                           |          |          |
| MPPyP                          | 654.33   | 654.38   | PAPMPPyPAPM            | 1218.60  | 1218.43  |                           |          |          |
| MPPyPA                         | 725.37   | 725.38   | PAPMPPyPAPMP           | 1315.66  | 1315.68  |                           |          |          |
| MPPyPAPMP                      | 1050.51  | 1050.51  |                        |          |          |                           |          |          |
| MPPyPAPMPPyP                   | 1475.75  | 1475.66  | y- b- cleavages (+2)   |          |          |                           |          |          |
| PPy                            | 426.24   | 426.28   | PyPAPMPPyPAP           | 708.38   | 708.66   |                           |          |          |
| PPyP                           | 523.29   | 523.43   | PPyPAPMPPyPAP          | 756.90   | 756.79   |                           |          |          |
| PPyPA                          | 594.33   | 594.34   |                        |          |          |                           |          |          |
| PPyPAP                         | 691.38   | 691.37   | Miscellaneous Ions     |          |          |                           |          |          |
| PPyPAPMP                       | 919.47   | 919.49   | PAPM -Met sidechain    | 321.16   | 321.20   |                           |          |          |
| PPyPAPMPP                      | 1016.53  | 1016.41  | PAPM y- a- cleavage    | 369.20   | 369.11   |                           |          |          |
| PPyPAPMPPy                     | 1247.66  | 1247.55  | PyPAP y- a- cleavage   | 566.33   | 566.41   |                           |          |          |
| PPyPAPMPPyPA                   | 1415.75  | 1415.75  | PMPPyPA -Met sidechain | 746.39   | 746.40   |                           |          |          |
| PyP                            | 426.24   | 426.28   | APMPPyP y- a- cleavage | 794.43   | 794.55   |                           |          |          |

(u) FT-ICR data showing ion whose mass (+/- 2 ppm) corresponds to prenylated cyclo[KKPYILP]

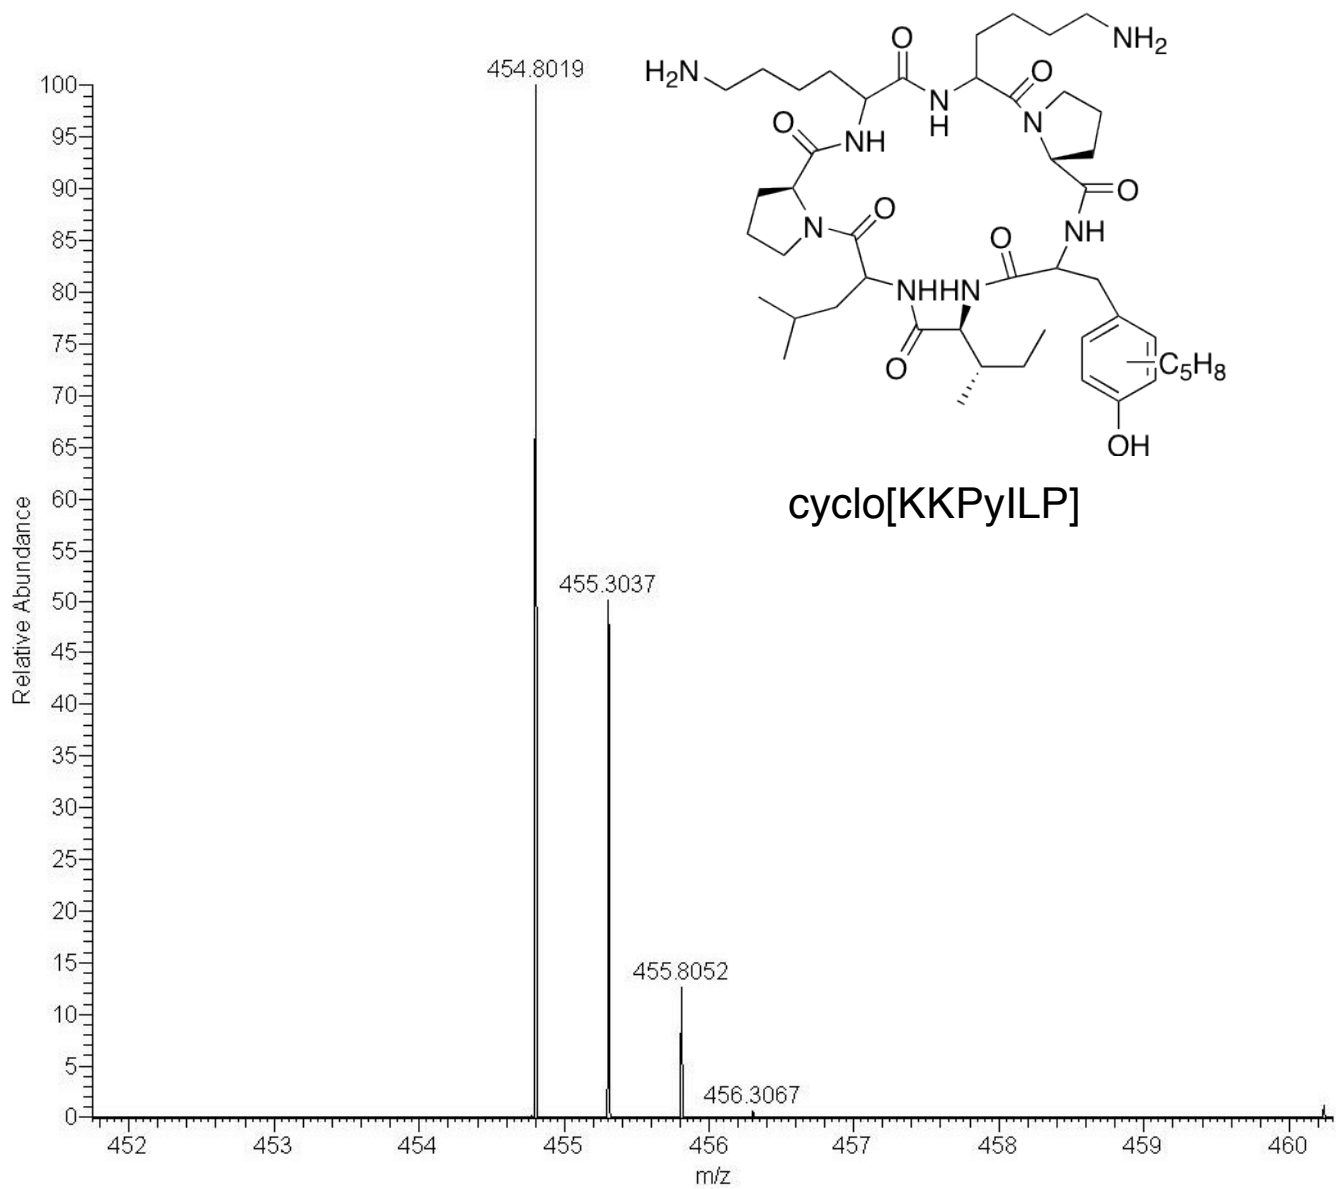

(v) LC-FT-ICR chromatogram selected for mass of prenylated cyclo[KKPYILP]; in this case alone was only a single broad chromatographic peak observed, most likely indicating that C- and O-prenylated isomers were not well separated

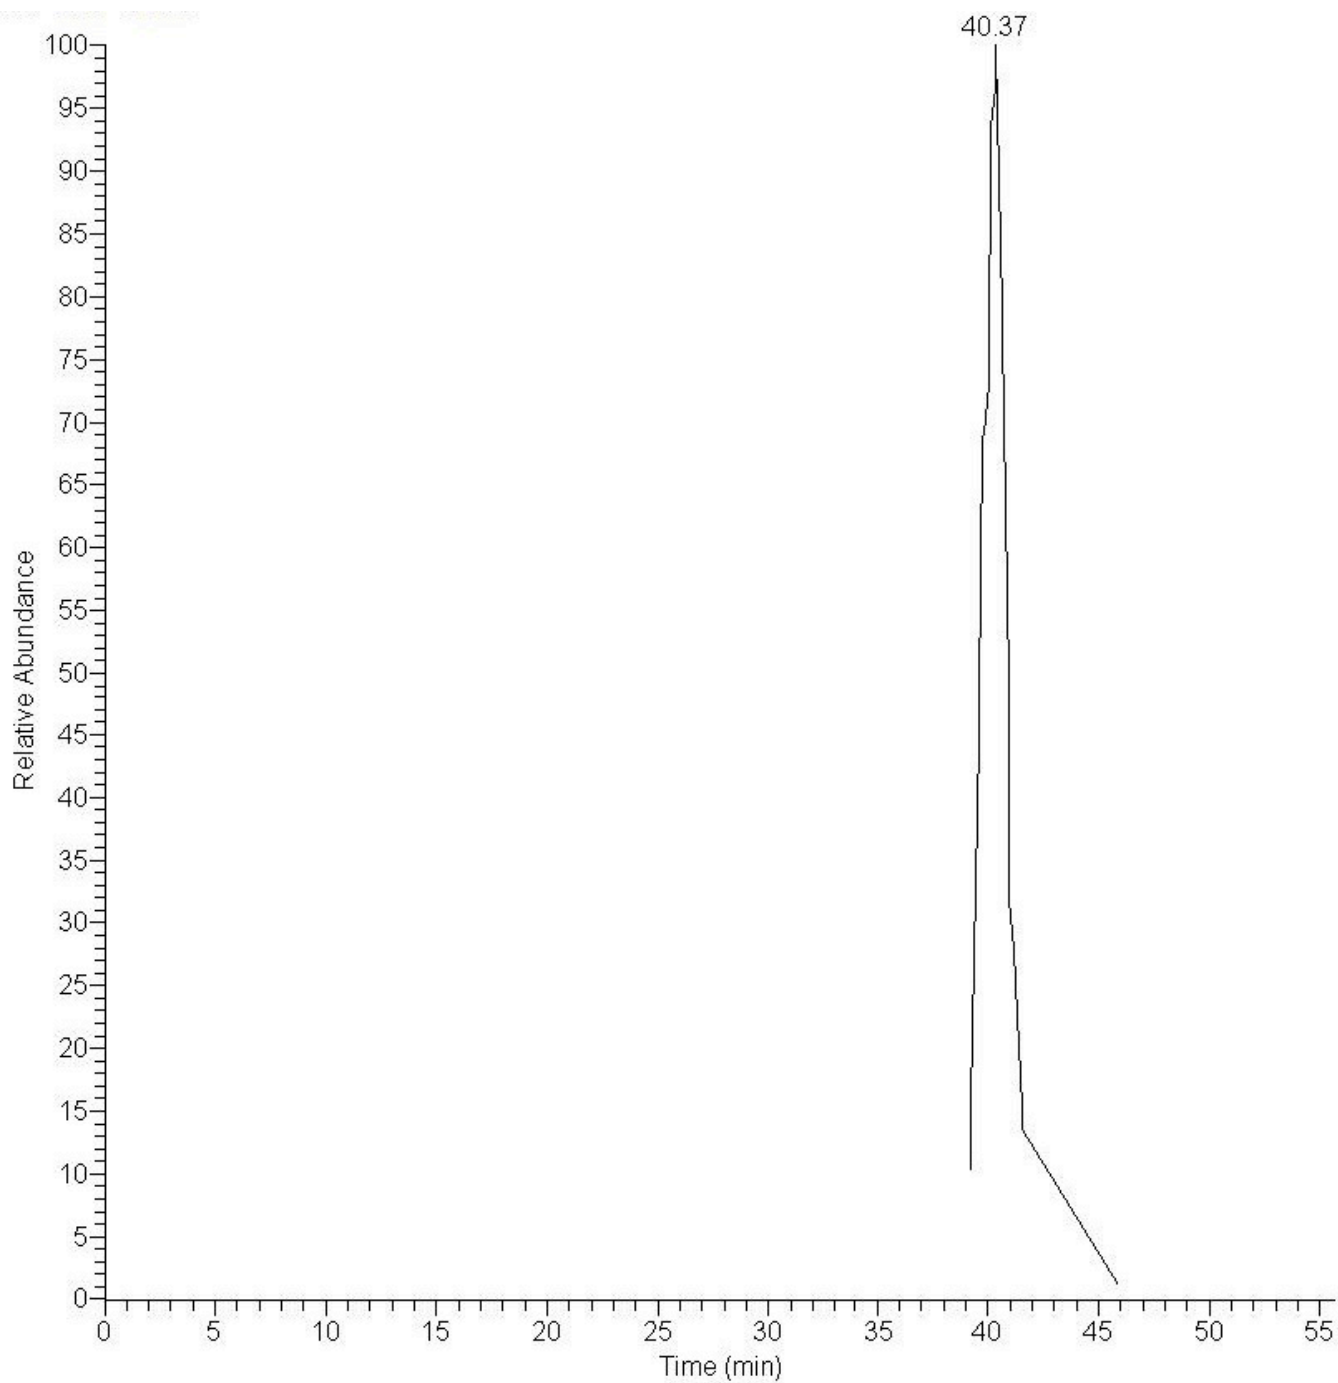

(w) MS-MS spectrum for product of reaction of LynF with cyclo[KKPYILP]

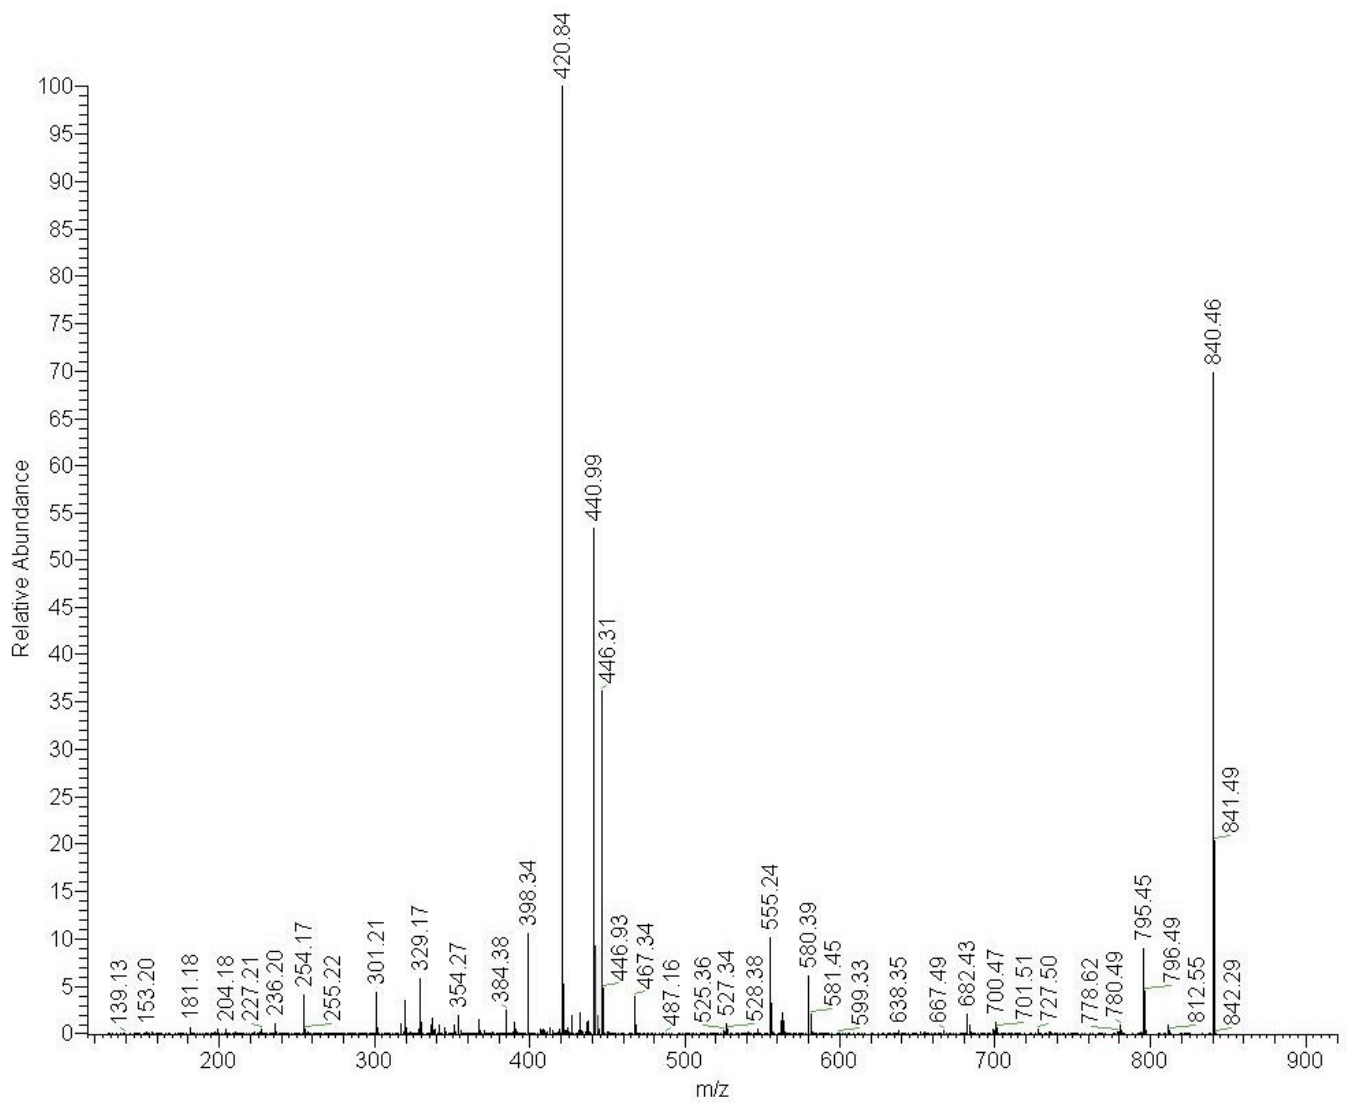

(x) MS-MS assignments for prenylated cyclo[KKPYILP] single peak; assignments consistent with presence of O-prenylated compound

| cyclo[KKPYILP] single peak |          |          |                             |          |          |
|----------------------------|----------|----------|-----------------------------|----------|----------|
| y- b- cleavages (+1)       | Expected | Observed | y- b- cleavages (+1)        | Expected | Observed |
| KK                         | 257.20   | -        | ILPKKP                      | 677.47   | -        |
| KKP                        | 354.25   | 354.27   | LP                          | 211.14   | -        |
| KKPy                       | 585.37   | -        | LPK                         | 339.24   | 339.28   |
| KKPyl                      | 698.46   | 698.44   | LPKK                        | 467.33   | 467.34   |
| KKPyIL                     | 811.54   | 811.53   | LPKKP                       | 564.39   | -        |
| KP                         | 226.16   | -        | LPKKPy                      | 795.51   | 795.45   |
| KPy                        | 457.28   | -        | PK                          | 226.16   | -        |
| KPyl                       | 570.36   | -        | PKK                         | 354.25   | 354.27   |
| KPyIL                      | 683.45   | -        | PKKP                        | 451.30   | -        |
| KPyILP                     | 780.50   | 780.49   | PKKPy                       | 682.43   | 682.43   |
| Py                         | 329.18   | 329.17   | PKKPyl                      | 795.51   | 795.45   |
| Pyl                        | 442.27   | 442.16   |                             |          |          |
| PylL                       | 555.35   | 555.24   | <b>y- b- cleavages (+2)</b> |          |          |
| PylLP                      | 652.40   | -        | KKPyl                       | 349.74   | 349.83   |
| PylLPK                     | 780.50   | 780.49   | PKKPyl                      | 398.26   | 398.35   |
| yl                         | 345.22   | 345.23   | PKKPy                       | 341.72   | 341.87   |
| ylL                        | 458.30   | -        |                             |          |          |
| yILP                       | 555.35   | 555.24   | <b>Miscellaneous Ions</b>   |          |          |
| yILPK                      | 683.45   | -        | All -prenyl +1              | 840.54   | 840.46   |
| yILPKK                     | 811.54   | 811.53   | All -prenyl +2              | 420.77   | 420.85   |
| IL                         | 227.18   | 227.21   | All -NH3, +2                | 446.29   | 446.31   |
| ILP                        | 324.23   | -        | All -acylium, +2            | 440.81   | 440.98   |
| ILPK                       | 452.32   | -        | Py y- a- cleavage +1        | 301.19   | 301.21   |
| ILPKK                      | 580.42   | 580.39   |                             |          |          |

(y) FT-ICR data showing ion whose mass (+/- 2 ppm) corresponds to prenylated cyclo[KPYILP]

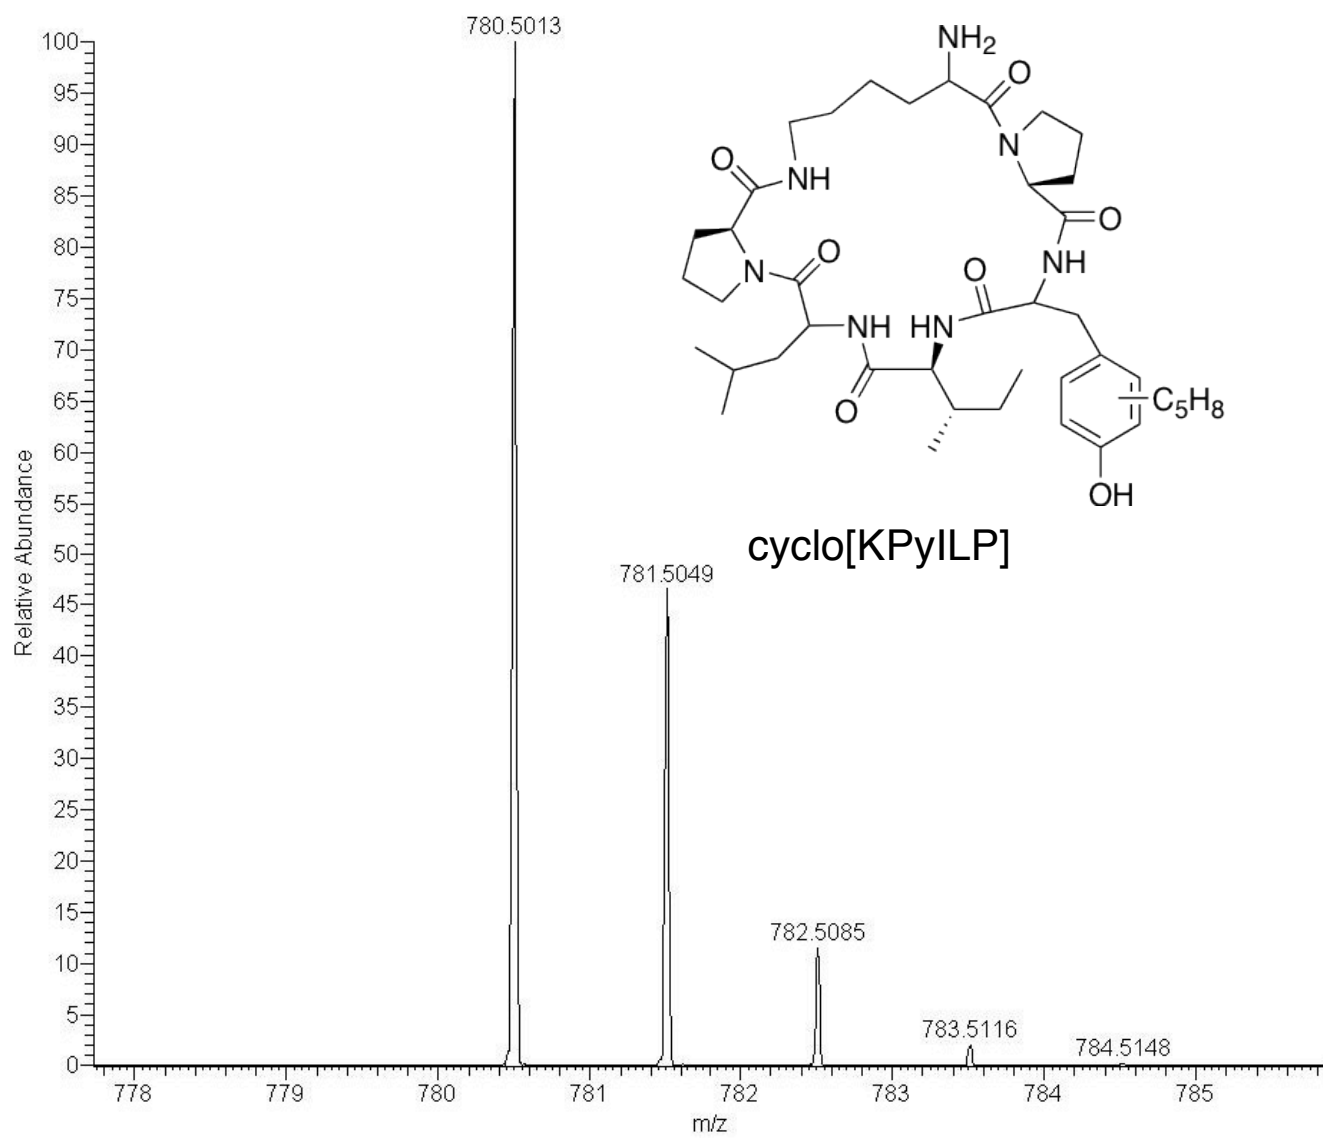

(z) LC-FT-ICR chromatogram selected for mass of prenylated cyclo[KPYILP]

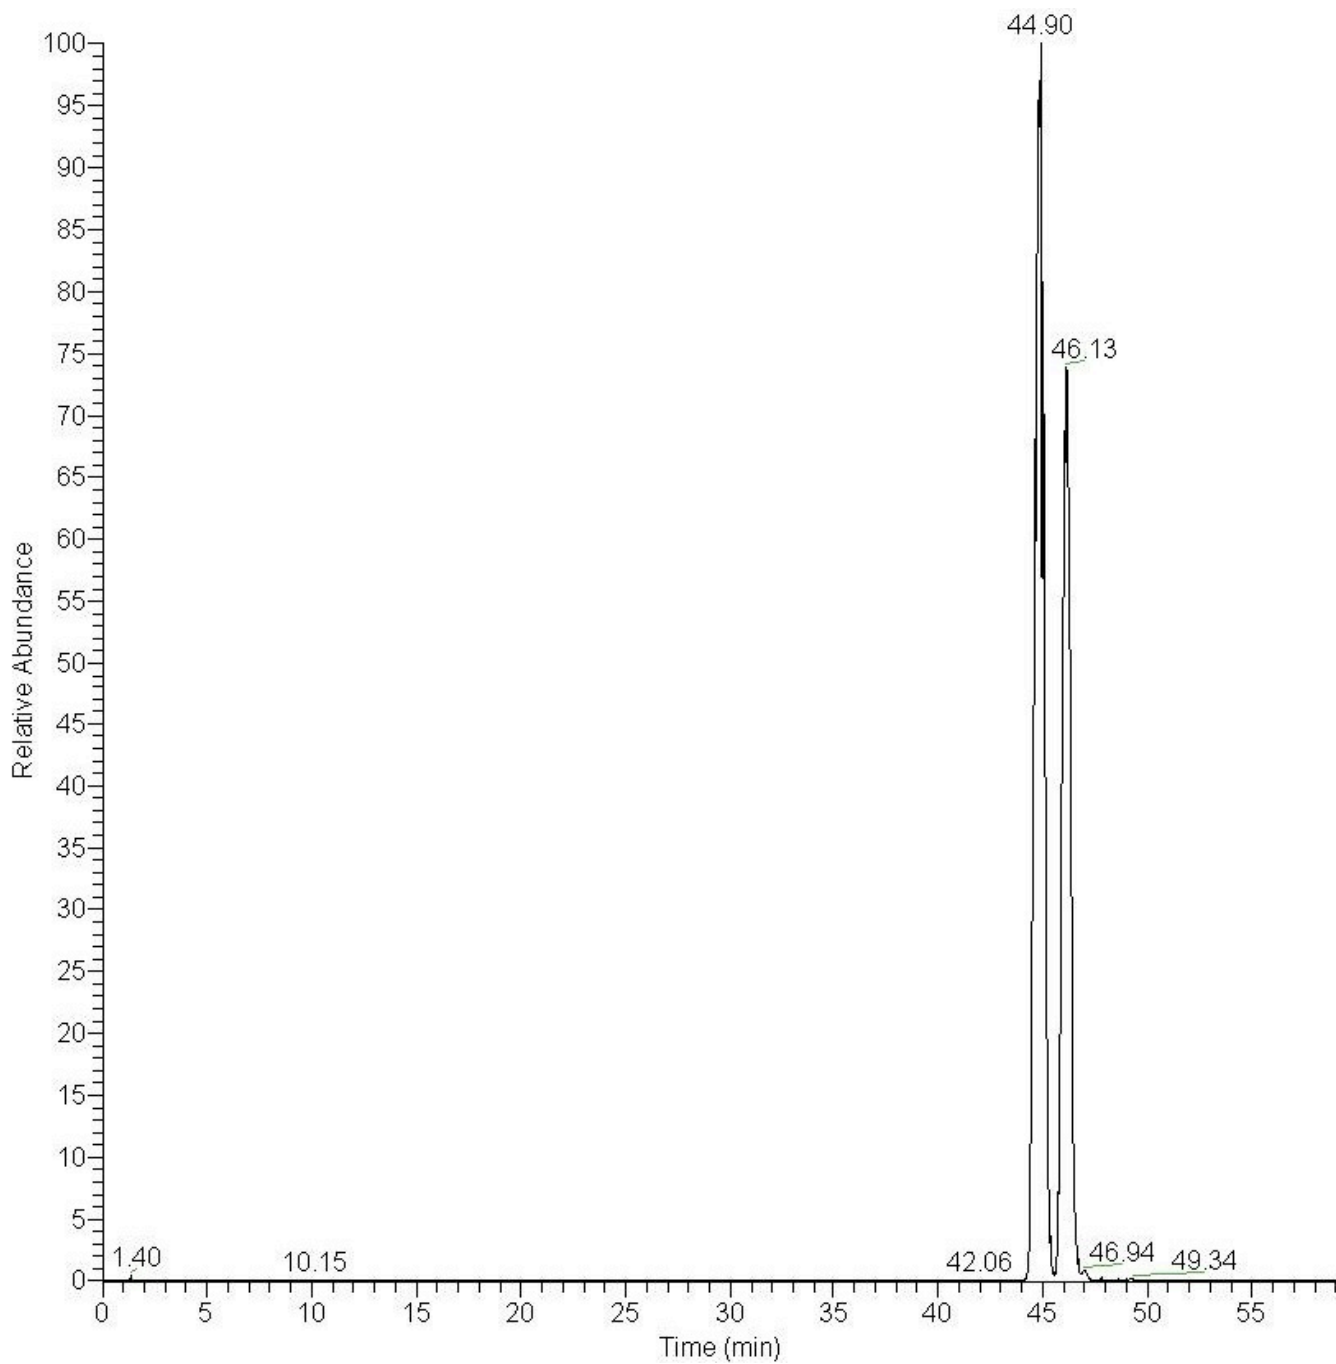

S31

(aa) MS-MS spectra for early (top) and late (bottom) eluting products of reaction of LynF with cyclo[KPYILP] (see chromatogram on previous page)

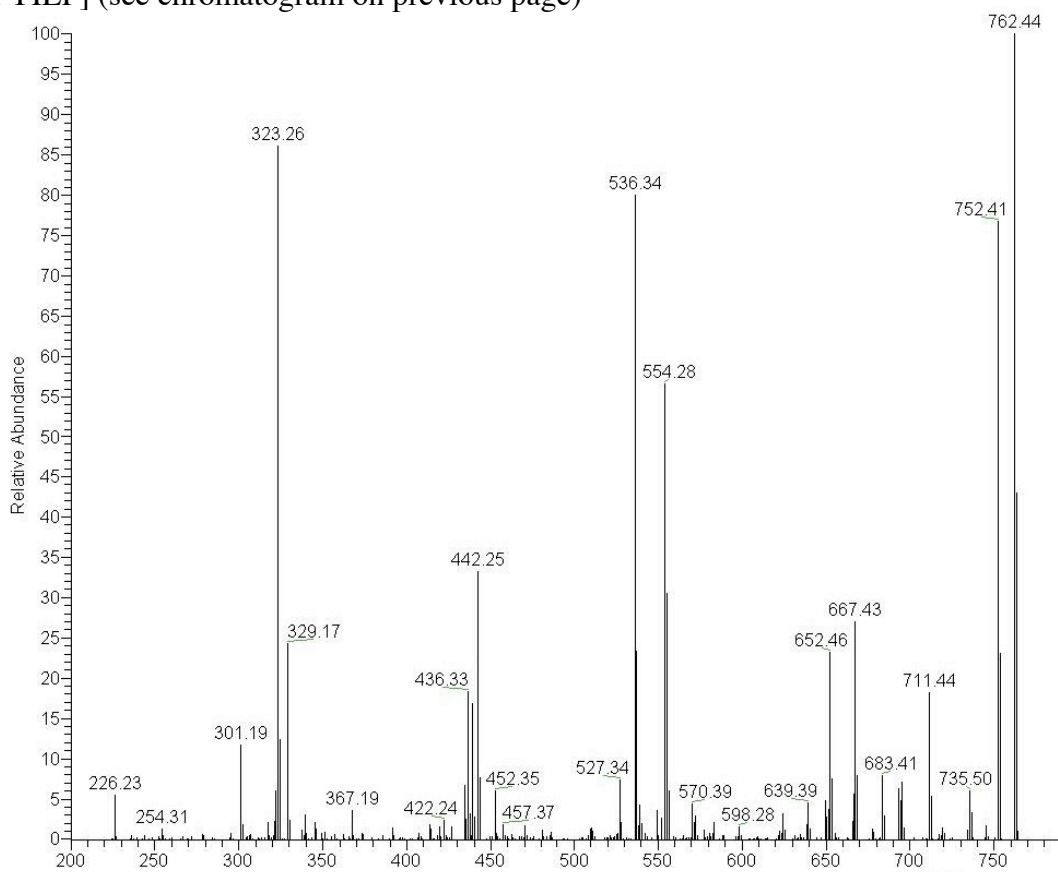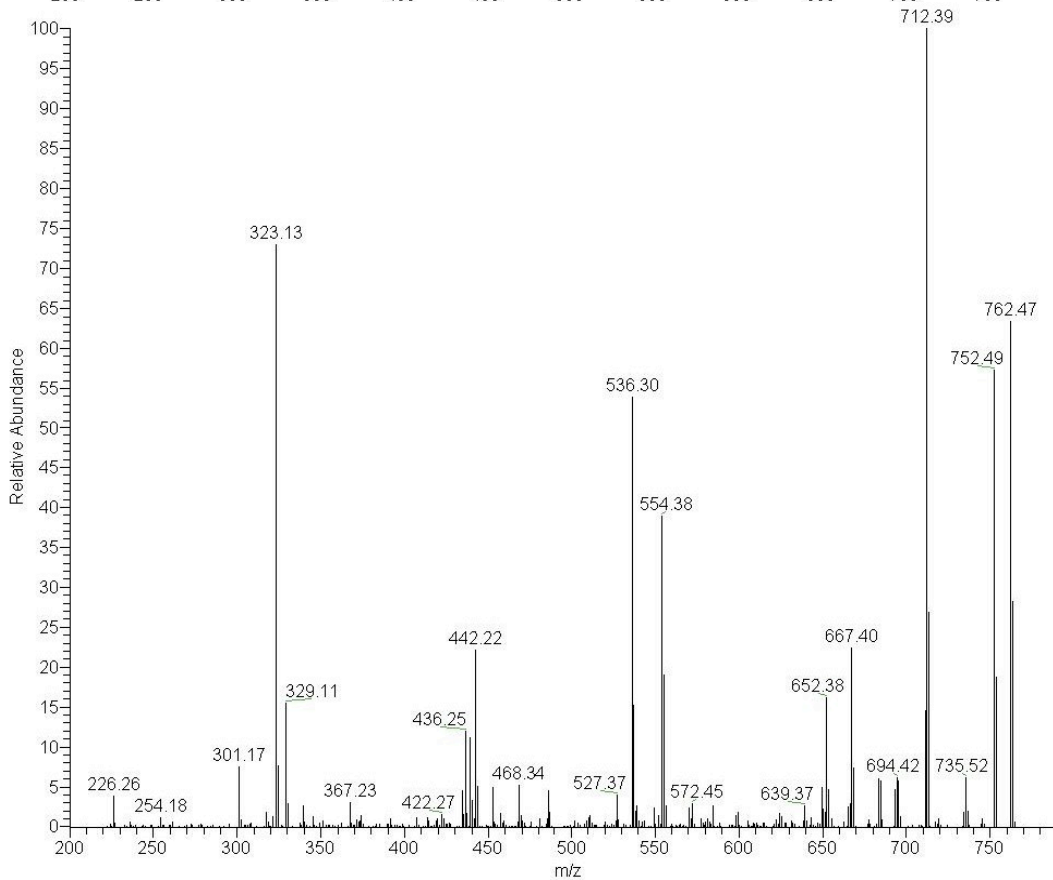



(bb) MS-MS assignments for prenylated cyclo[KPYILP] early (top) and late (bottom) eluting isomers

| cyclo[KPYILP] 1st peak (C-prenyl) |          |          |                      |          |          |
|-----------------------------------|----------|----------|----------------------|----------|----------|
| y- b- cleavages (+1)              | Expected | Observed | y- b- cleavages (+2) | Expected | Observed |
| KP                                | 226.16   | 226.23   | KPyIL                | 342.23   | 342.25   |
| KPy                               | 457.28   | 457.37   | PKPyI                | 334.22   | 334.27   |
| KPyl                              | 570.36   | 570.39   |                      |          |          |
| KPyIL                             | 683.45   | 683.41   | Miscellaneous Ions   |          |          |
| Py                                | 329.18   | 329.17   | All -H2O             | 762.49   | 762.44   |
| Pyl                               | 442.27   | 442.25   | All -acylium         | 752.51   | 752.41   |
| PyIL                              | 555.35   | 555.32   | PKPy -H2O            | 536.32   | 536.34   |
| PyILP                             | 652.40   | 652.46   | Py y- a- cleavage +1 | 301.19   | 301.19   |
| yl                                | 345.22   | 345.19   |                      |          |          |
| yIL                               | 458.30   | -        |                      |          |          |
| yILP                              | 555.35   | 555.32   |                      |          |          |
| yILPK                             | 683.45   | 683.41   |                      |          |          |
| IL                                | 227.18   | -        |                      |          |          |
| ILP                               | 324.23   | -        |                      |          |          |
| ILPK                              | 452.32   | 452.35   |                      |          |          |
| ILPKP                             | 549.38   | 549.36   |                      |          |          |
| LP                                | 211.14   | -        |                      |          |          |
| LPK                               | 339.24   | 339.31   |                      |          |          |
| LPKP                              | 436.29   | 436.33   |                      |          |          |
| LPKPy                             | 667.42   | 667.43   |                      |          |          |
| PK                                | 226.16   | 226.23   |                      |          |          |
| PKP                               | 323.21   | 323.26   |                      |          |          |
| PKPy                              | 554.33   | 554.28   |                      |          |          |
| PKPyI                             | 667.42   | 667.43   |                      |          |          |
| cyclo[KPYILP] 2nd peak (O-prenyl) |          |          |                      |          |          |
| y- b- cleavages (+1)              | Expected | Observed | y- b- cleavages (+2) | Expected | Observed |
| KP                                | 226.16   | 226.26   | KPyIL                | 342.23   | -        |
| KPy                               | 457.28   | -        | PKPyI                | 334.22   | -        |
| KPyl                              | 570.36   | -        |                      |          |          |
| KPyIL                             | 683.45   | -        | Miscellaneous Ions   |          |          |
| Py                                | 329.18   | 329.11   | All -H2O             | 762.49   | 762.47   |
| Pyl                               | 442.27   | 442.22   | All -acylium         | 752.51   | 752.49   |
| PyIL                              | 555.35   | 555.25   | All -prenyl          | 712.44   | 712.39   |
| PyILP                             | 652.40   | 652.38   | All -H2O, -prenyl    | 694.43   | 694.42   |
| yl                                | 345.22   | 345.11   | PKPy -H2O            | 536.32   | 536.30   |
| yIL                               | 458.30   | -        | Py y- a- cleavage +1 | 301.19   | 301.17   |
| yILP                              | 555.35   | 555.32   |                      |          |          |
| yILPK                             | 683.45   | -        |                      |          |          |
| IL                                | 227.18   | -        |                      |          |          |
| ILP                               | 324.23   | -        |                      |          |          |
| ILPK                              | 452.32   | -        |                      |          |          |
| ILPKP                             | 549.38   | -        |                      |          |          |
| LP                                | 211.14   | -        |                      |          |          |
| LPK                               | 339.24   | -        |                      |          |          |
| LPKP                              | 436.29   | 436.25   |                      |          |          |
| LPKPy                             | 667.42   | 667.40   |                      |          |          |
| PK                                | 226.16   | 226.26   |                      |          |          |
| PKP                               | 323.21   | 323.13   |                      |          |          |
| PKPy                              | 554.33   | 554.38   |                      |          |          |
| PKPyI                             | 667.42   | 667.40   |                      |          |          |

(cc) FT-ICR data showing ion whose mass (+/- 2 ppm) corresponds to prenylated KPYILP

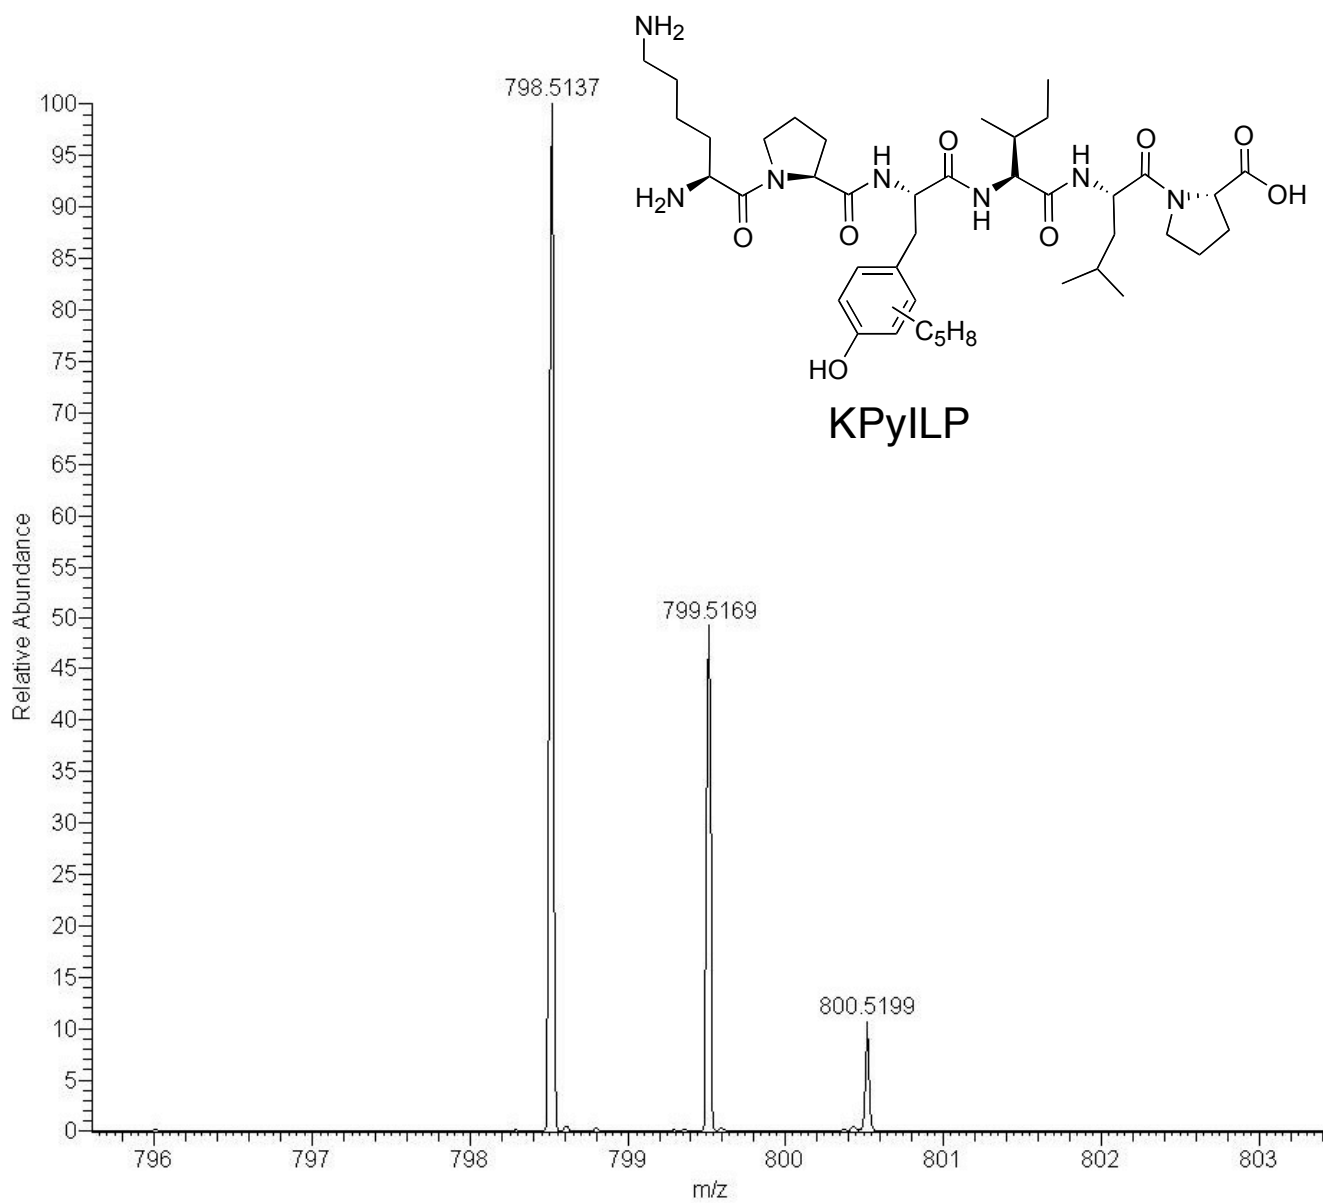

(dd) LC-FT-ICR chromatogram selected for mass of prenylated KPYILP

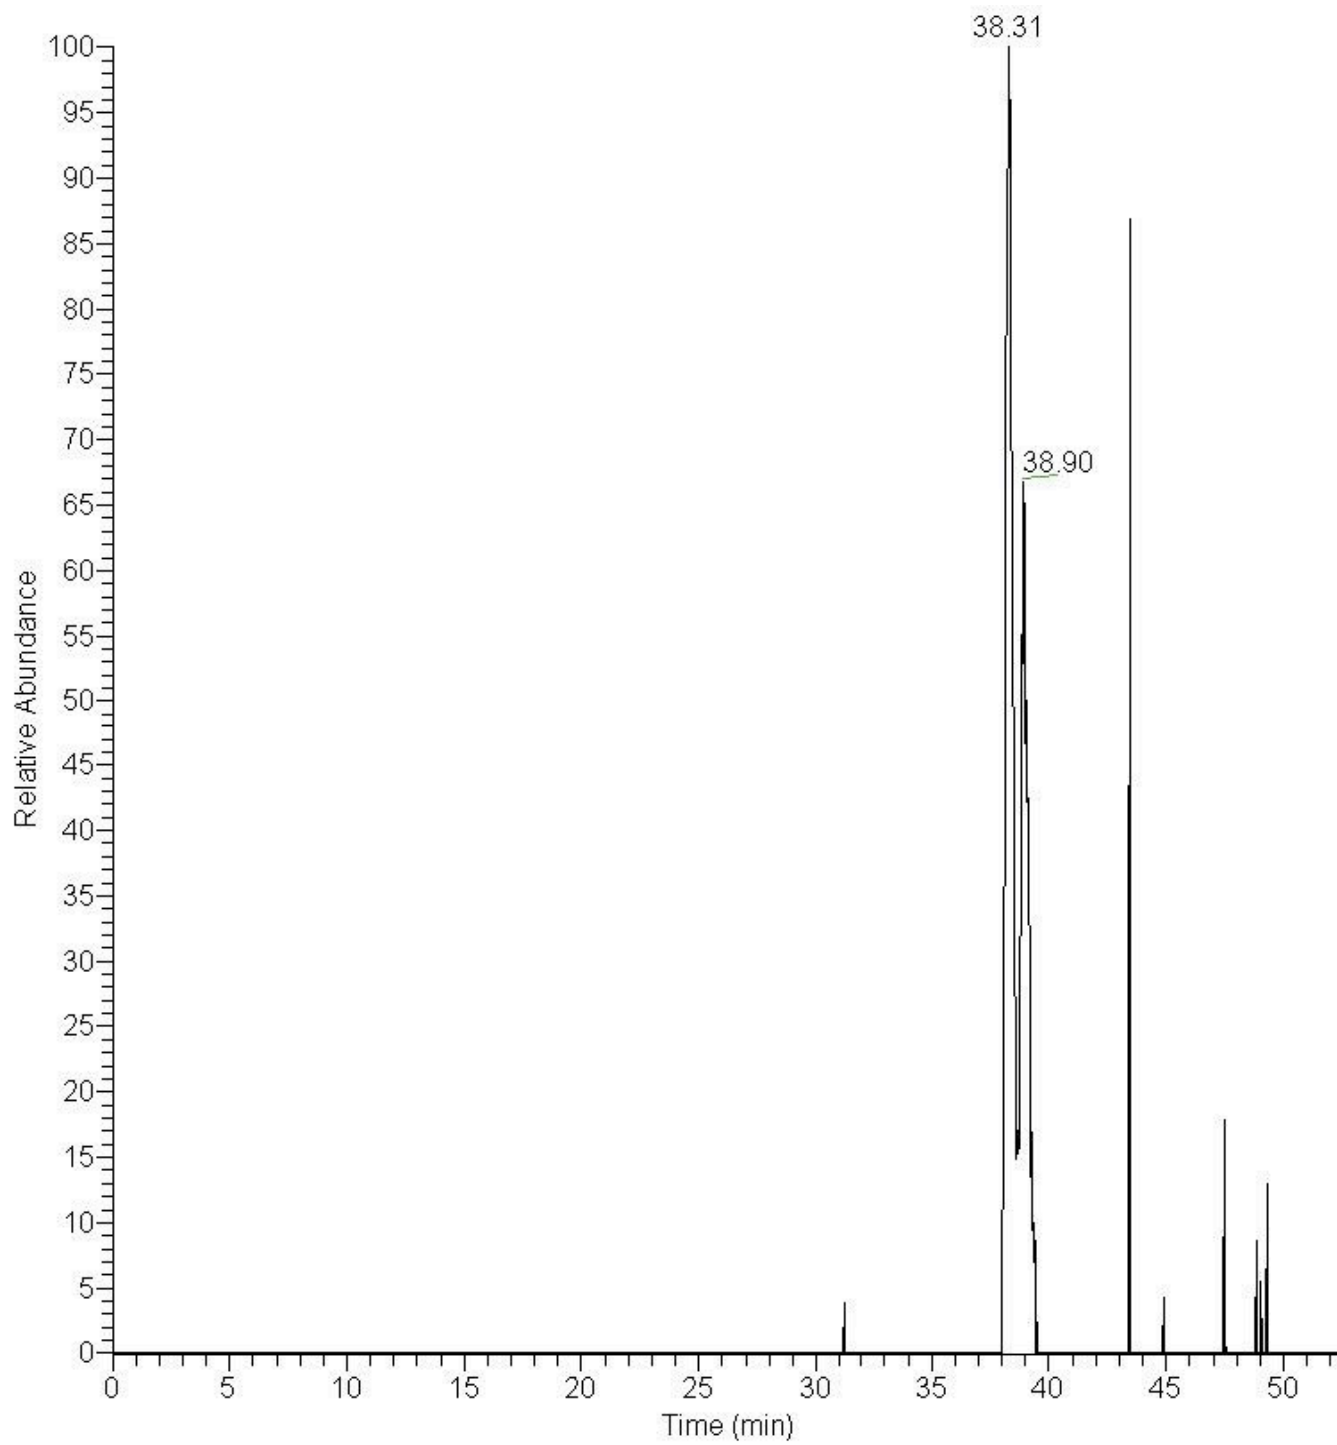

(ee) MS-MS spectra for early (top) and late (bottom) eluting products of reaction of LynF with KPYILP (see chromatogram on previous page)

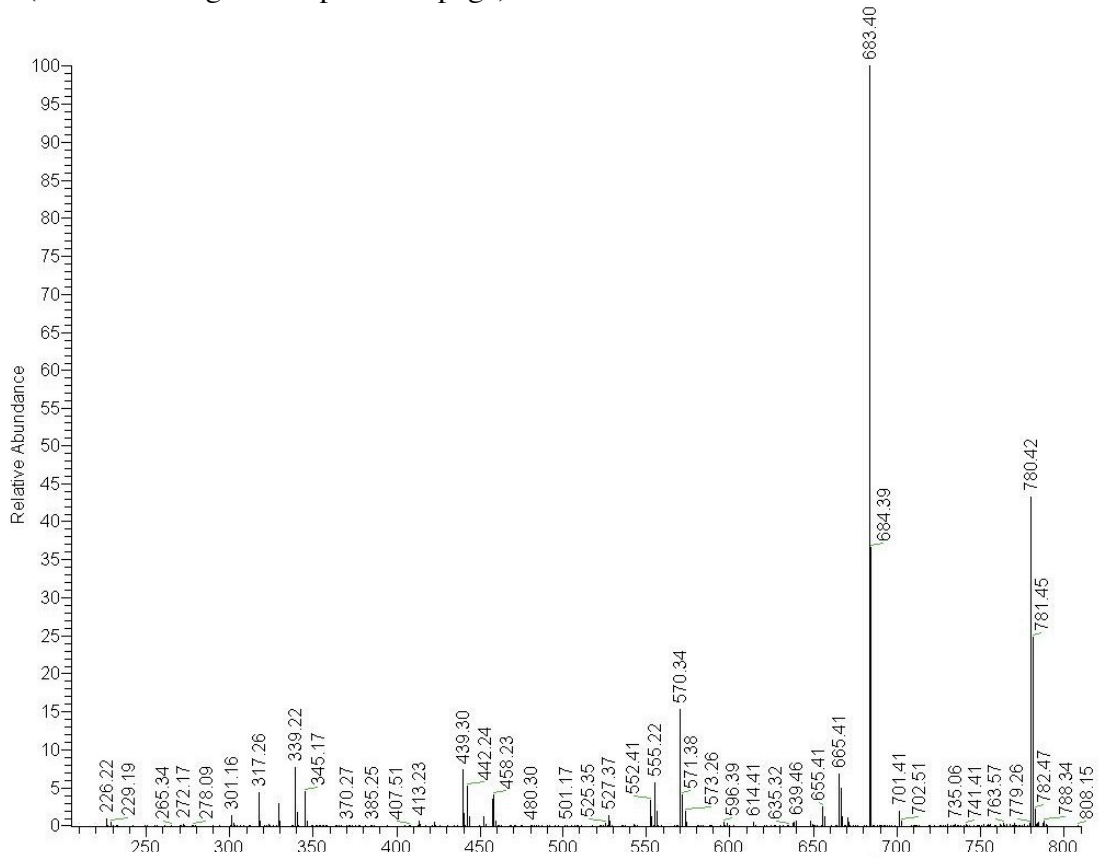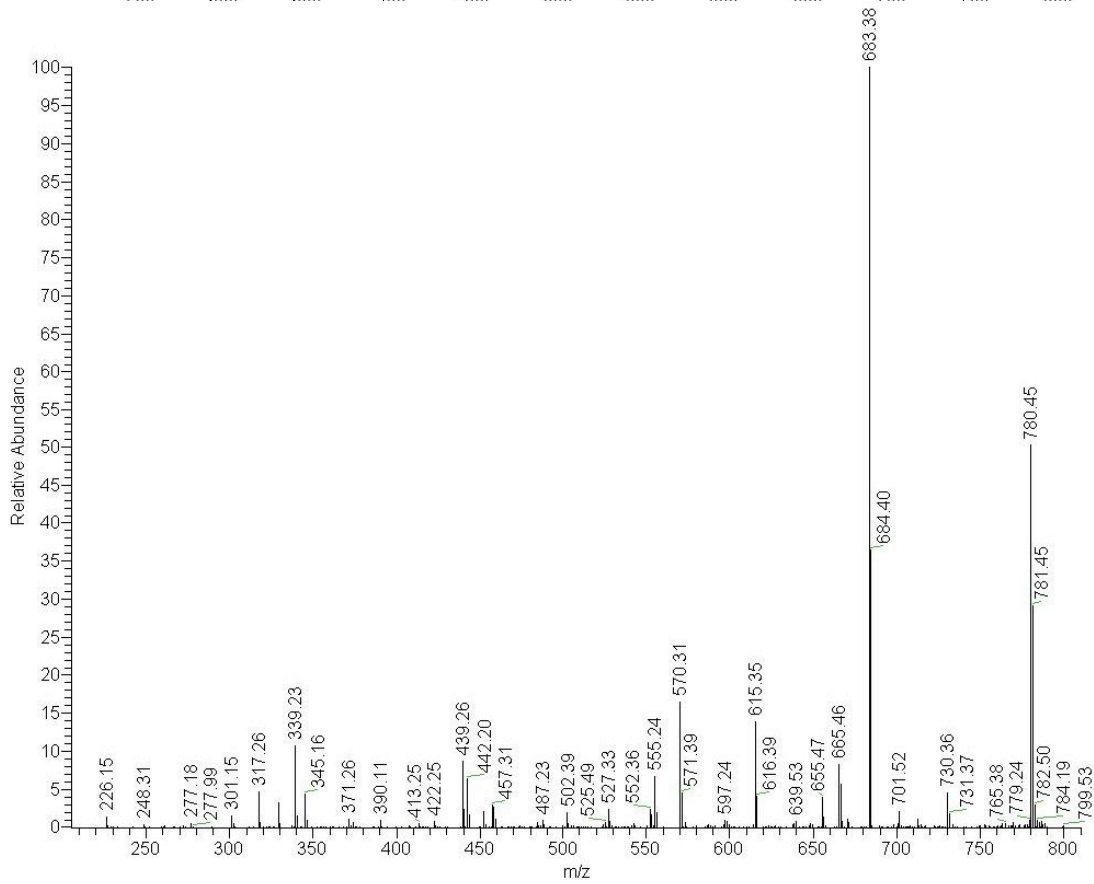

(ff) MS-MS assignments for prenylated KPYILP early (left) and late (right) eluting isomers

| KPYILP 1st peak (C-prenyl) |          |          |
|----------------------------|----------|----------|
| b-ions (+1)                | Expected | Observed |
| KP                         | 226.16   | 226.22   |
| KPy                        | 457.28   | 457.25   |
| KPy <sup>o</sup>           | 439.27   | 439.30   |
| KPyl                       | 570.36   | 570.34   |
| KPyl <sup>o</sup>          | 552.35   | 552.41   |
| KPyIL                      | 683.45   | 683.41   |
| KPYIL <sup>o</sup>         | 665.44   | 665.41   |
| KPyILP <sup>o</sup>        | 780.50   | 780.42   |
| y-ions (+1)                |          |          |
| PyILP                      | 670.41   | -        |
| yILP                       | 573.36   | 573.26   |
| ILP                        | 342.24   | -        |
| LP                         | 229.15   | -        |
| y- b- cleavages (+1)       |          |          |
| LPK                        | 339.24   | 339.22   |
| yl                         | 345.22   | 345.17   |
| yIL                        | 458.30   | 458.23   |
| Pyl                        | 442.27   | 442.24   |
| PylIL                      | 555.35   | 555.22   |
| y- a- cleavages (+1)       |          |          |
| yl                         | 317.22   | 317.26   |
| yILP                       | 527.36   | 527.37   |
| Miscellaneous Ions         |          |          |
| KPyIL a-cleavage +1        | 655.45   | 655.47   |

| KPYILP 2nd peak (O-prenyl) |          |          |
|----------------------------|----------|----------|
| b-ions (+1)                | Expected | Observed |
| KP                         | 226.16   | 226.13   |
| KPy                        | 457.28   | 457.31   |
| KPy <sup>o</sup>           | 439.27   | 439.26   |
| KPyl                       | 570.36   | 570.31   |
| KPyl <sup>o</sup>          | 552.35   | 552.35   |
| KPyIL                      | 683.45   | 683.38   |
| KPYIL <sup>o</sup>         | 665.44   | 665.46   |
| KPyILP <sup>o</sup>        | 780.50   | 780.44   |
| y-ions (+1)                |          |          |
| PyILP                      | 670.41   | 670.35   |
| yILP                       | 573.36   | -        |
| ILP                        | 342.24   | -        |
| LP                         | 229.15   | -        |
| y- b- cleavages (+1)       |          |          |
| Py                         | 329.19   | 329.17   |
| LPK                        | 339.24   | 339.24   |
| Pyl                        | 442.27   | 442.20   |
| PylIL                      | 555.35   | 555.24   |
| yl                         | 345.22   | 345.15   |
| yIL                        | 458.30   | 458.31   |
| y- a- cleavages (+1)       |          |          |
| yl                         | 317.22   | 317.24   |
| yILP                       | 527.36   | 527.31   |
| Miscellaneous Ions         |          |          |
| KPYILP -prenyl +1          | 730.45   | 730.40   |
| KPYILP a-cleavage +1       | 655.45   | 655.46   |
| KPyIL -prenyl +1           | 615.39   | 615.36   |
| KPyl -prenyl +1            | 502.30   | 502.39   |

(gg) FT-ICR data showing ion whose mass (+/- 2 ppm) corresponds to prenylated boc-L-tyrosine

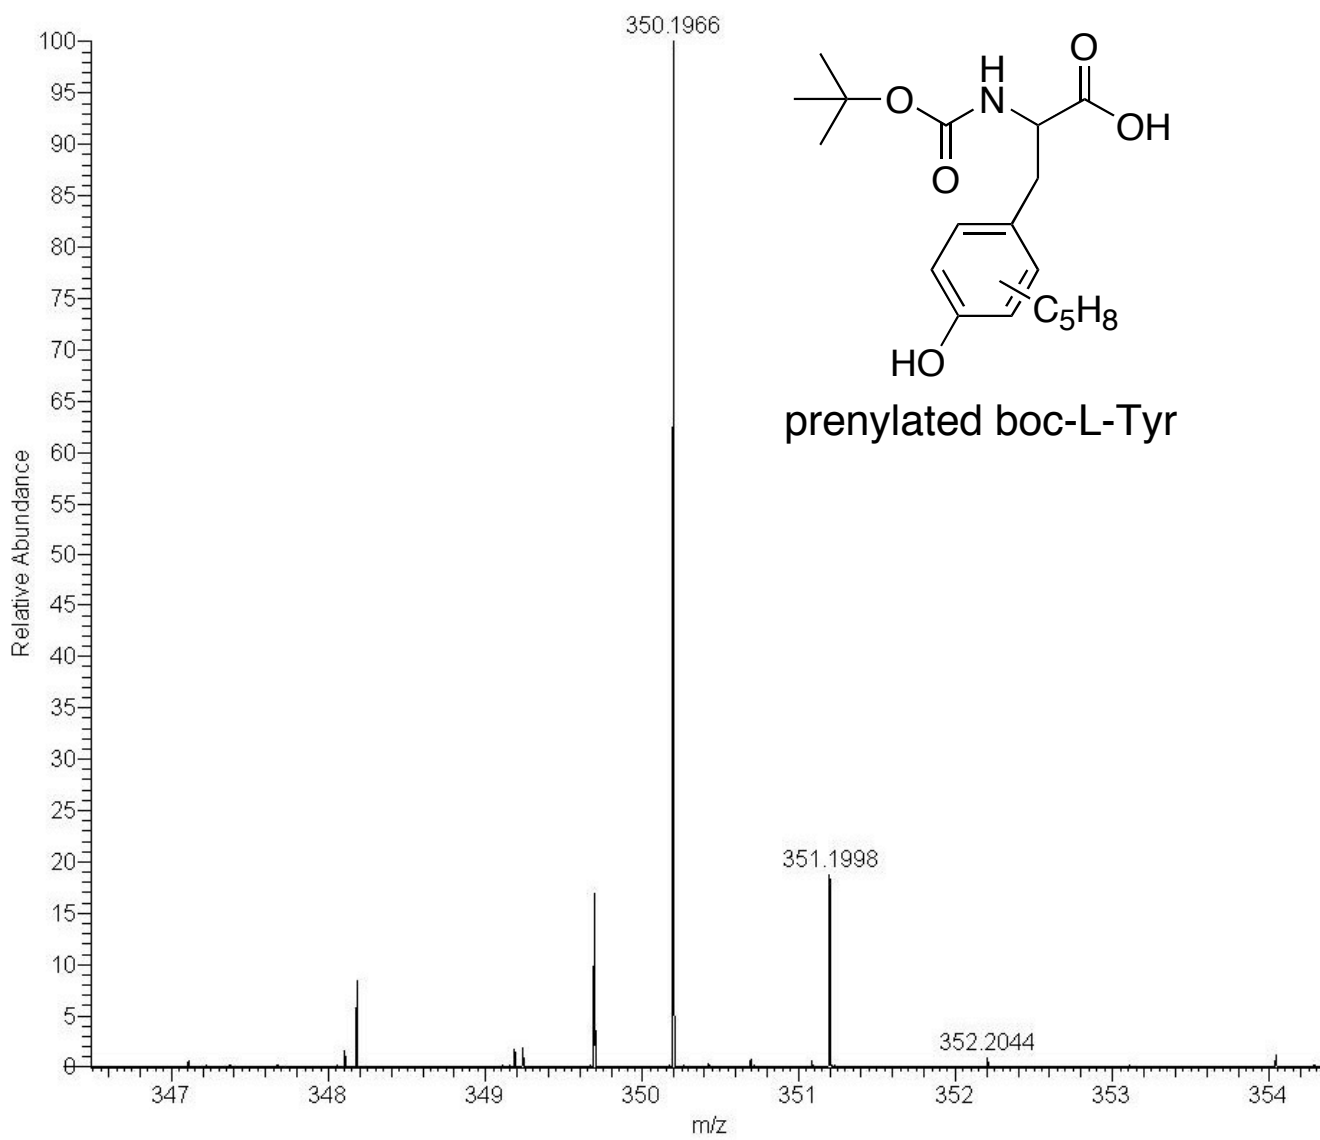

(hh) LC-FT-ICR chromatogram selected for the mass of prenylated boc-L-tyrosine

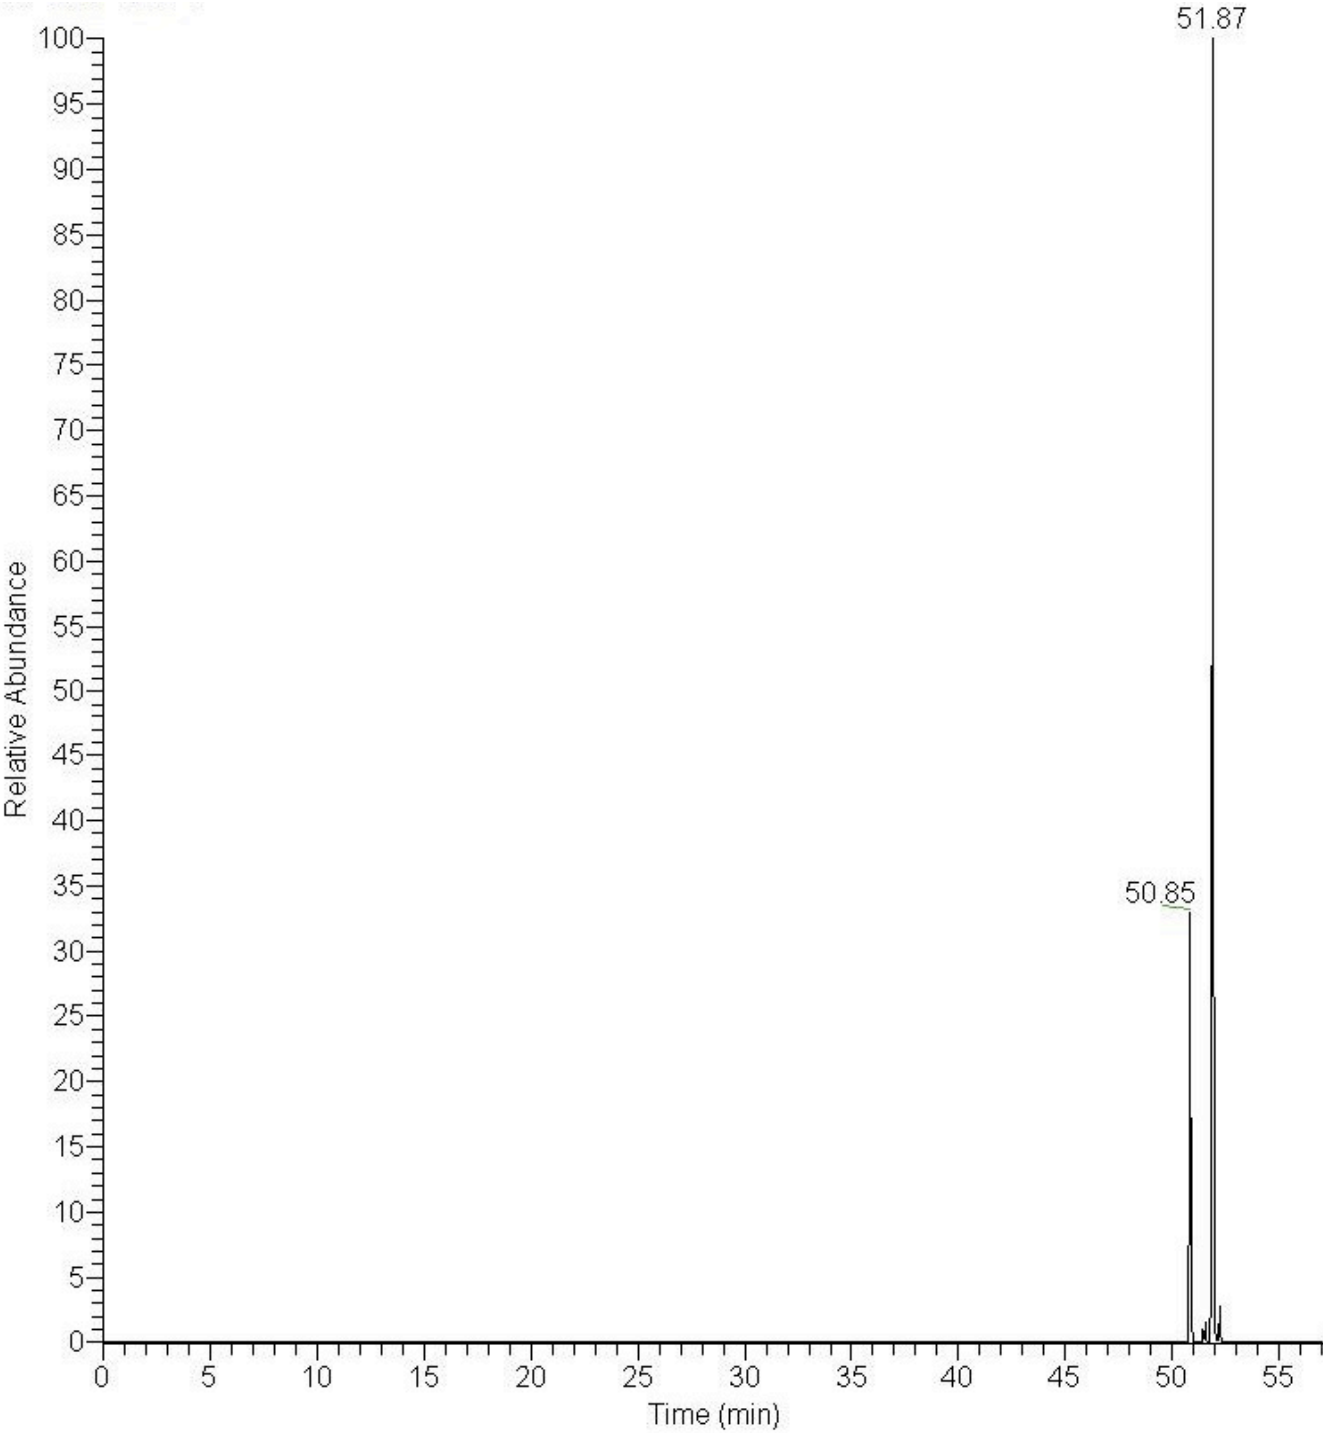

(jj) ESI-MS spectrum showing ion corresponding to the mass of prenylated N-acetyl-L-Tyr

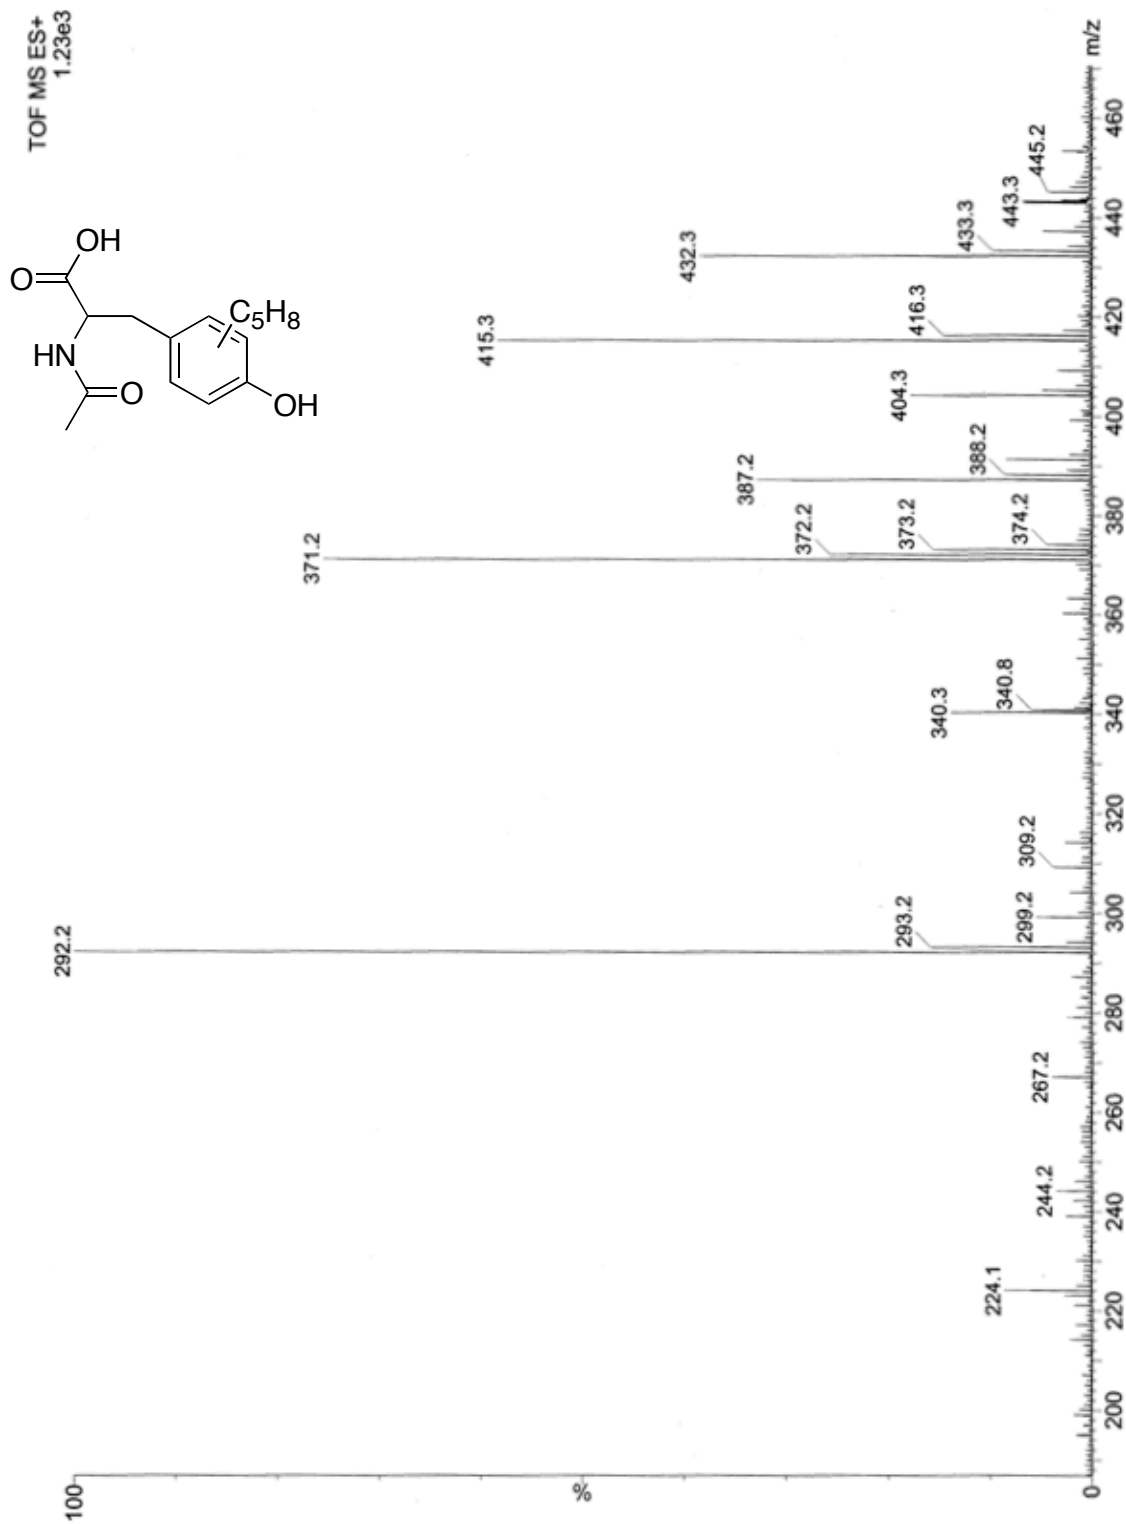



**Figure S2.** Precursor peptides are not substrates for prenyltransfer (a) ESI-MS intact analysis of time points taken from a reaction containing TruLy1, LynF and standard additives at 0, 6, 12, 24 h (deconvoluted spectra shown); expected mass of unmodified TruLy1 is 9104 Da. No reaction is observed even after 24 h incubation at 37 °C (b) Incorporation of tritiated DMAPP into various substrates; background subtracted counts-per-minute (CPM) shown

(a)

0h time point

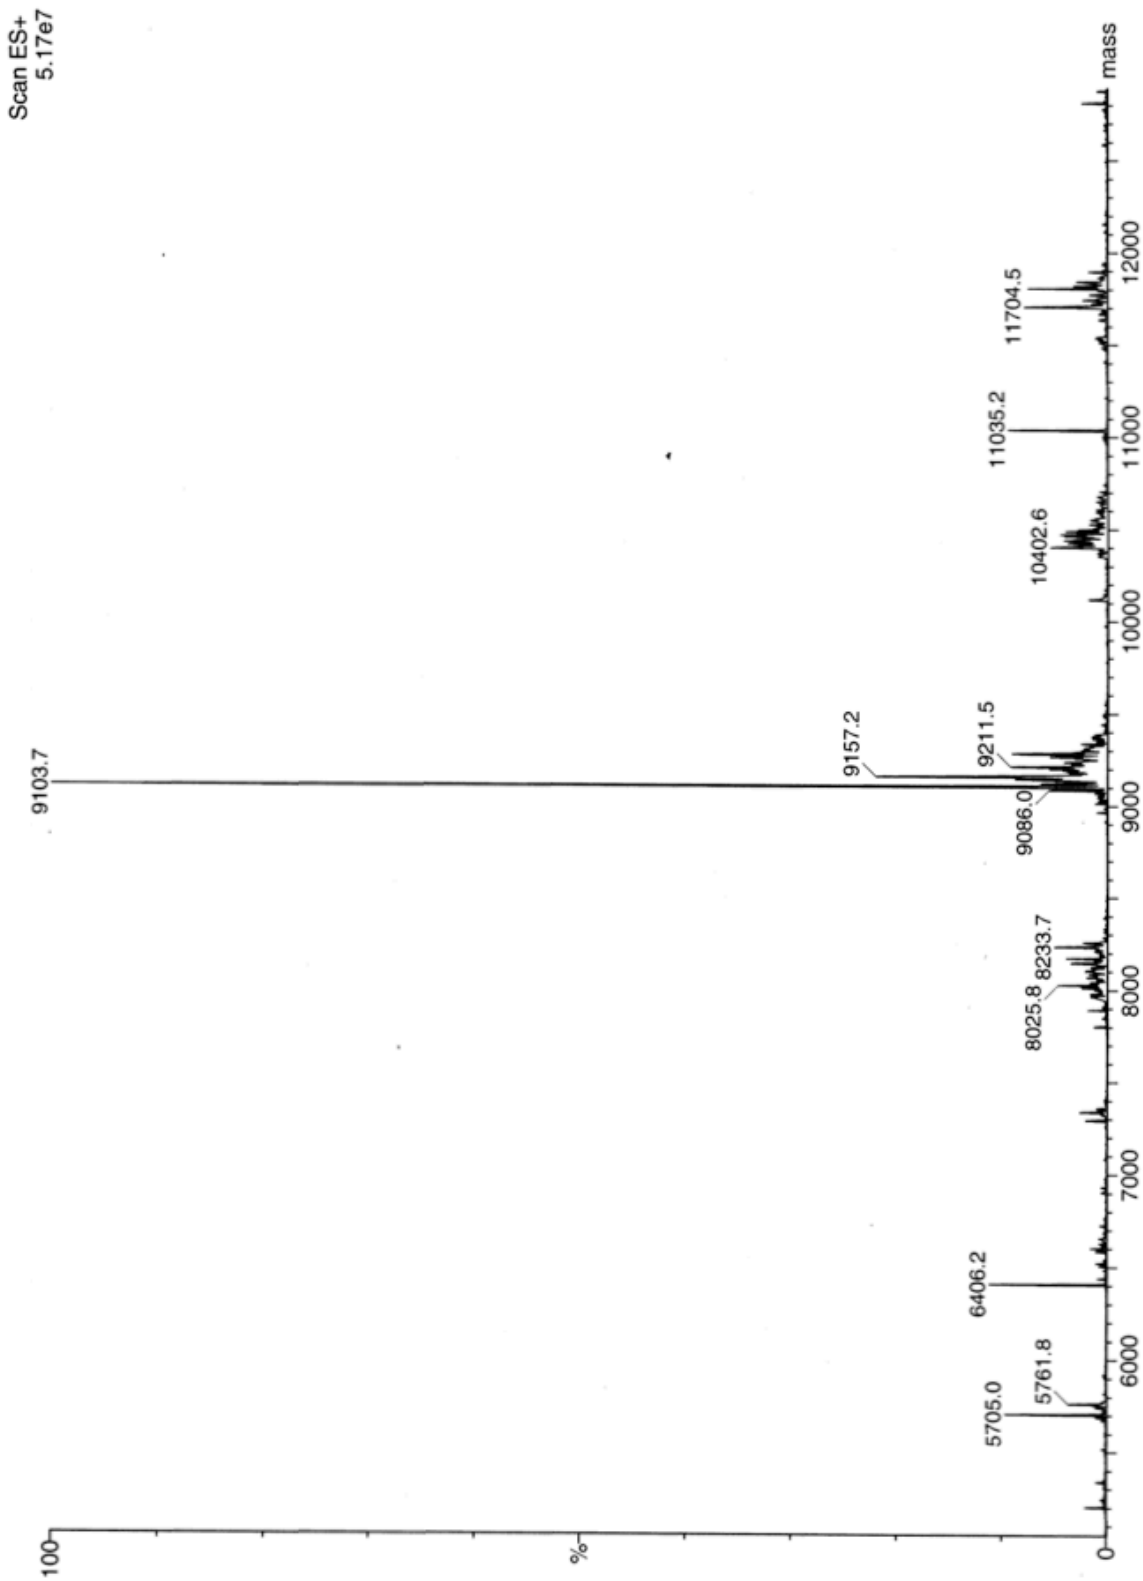

6h time point

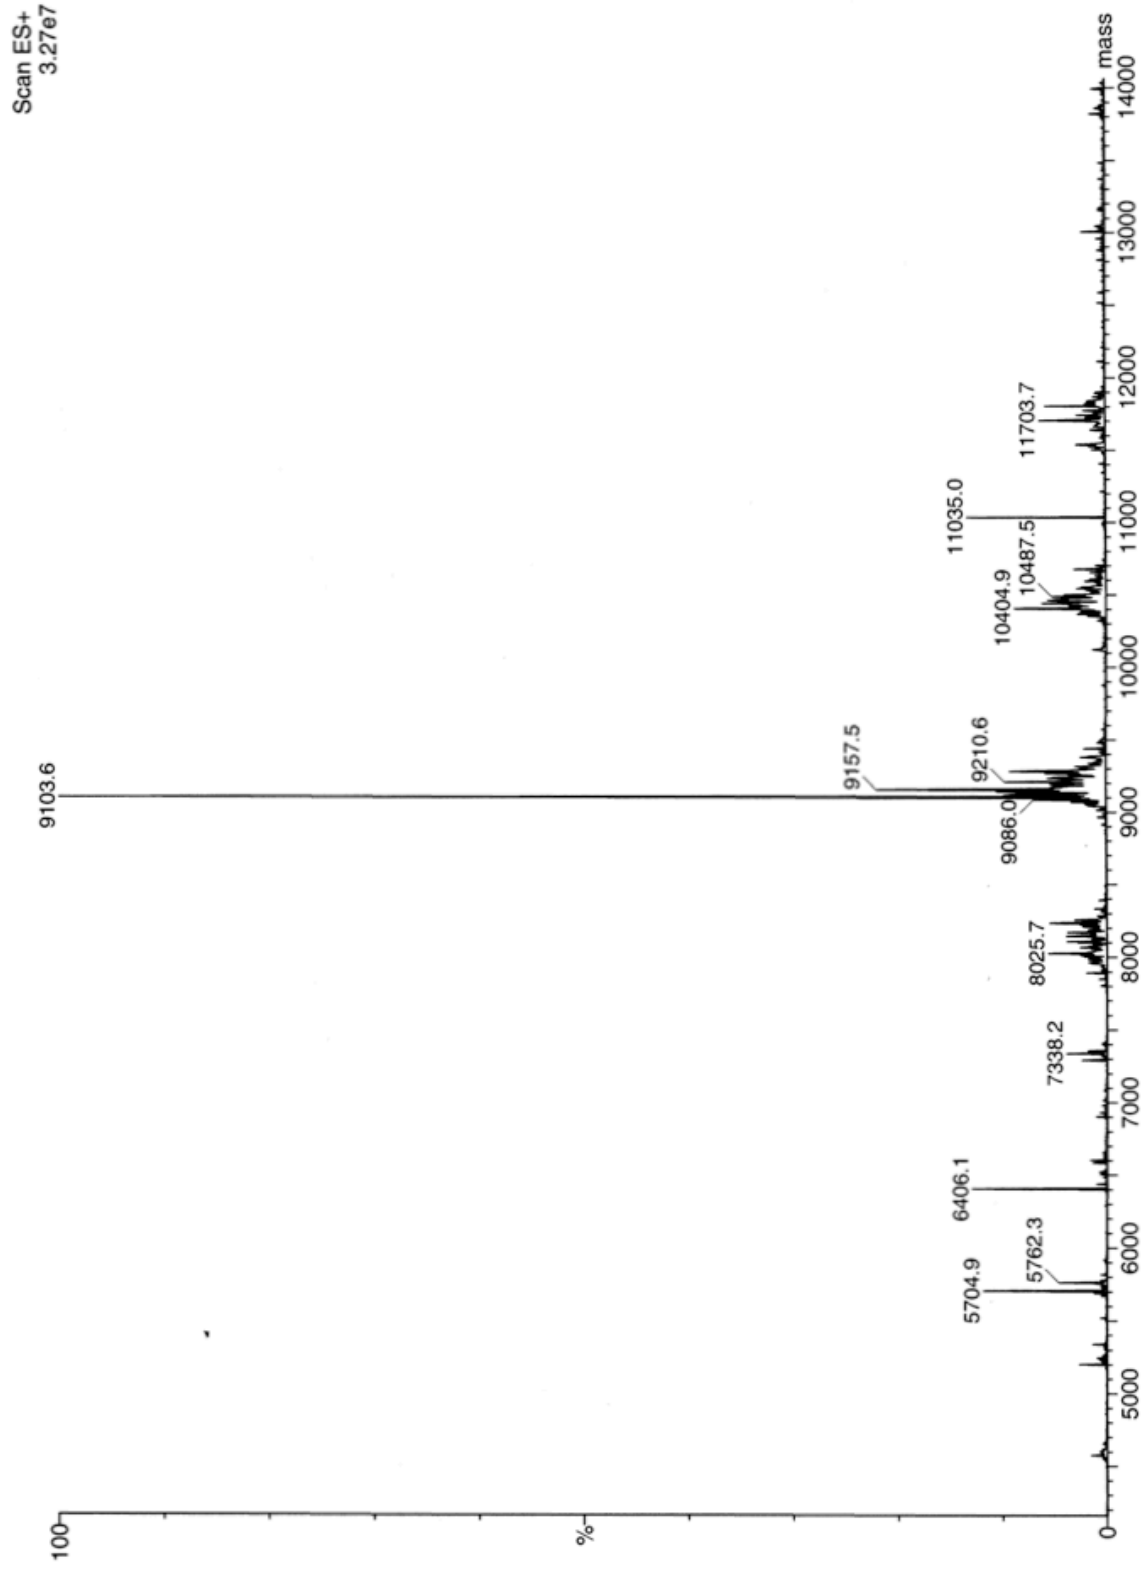

Scan ES+  
2.02e7

12h time point

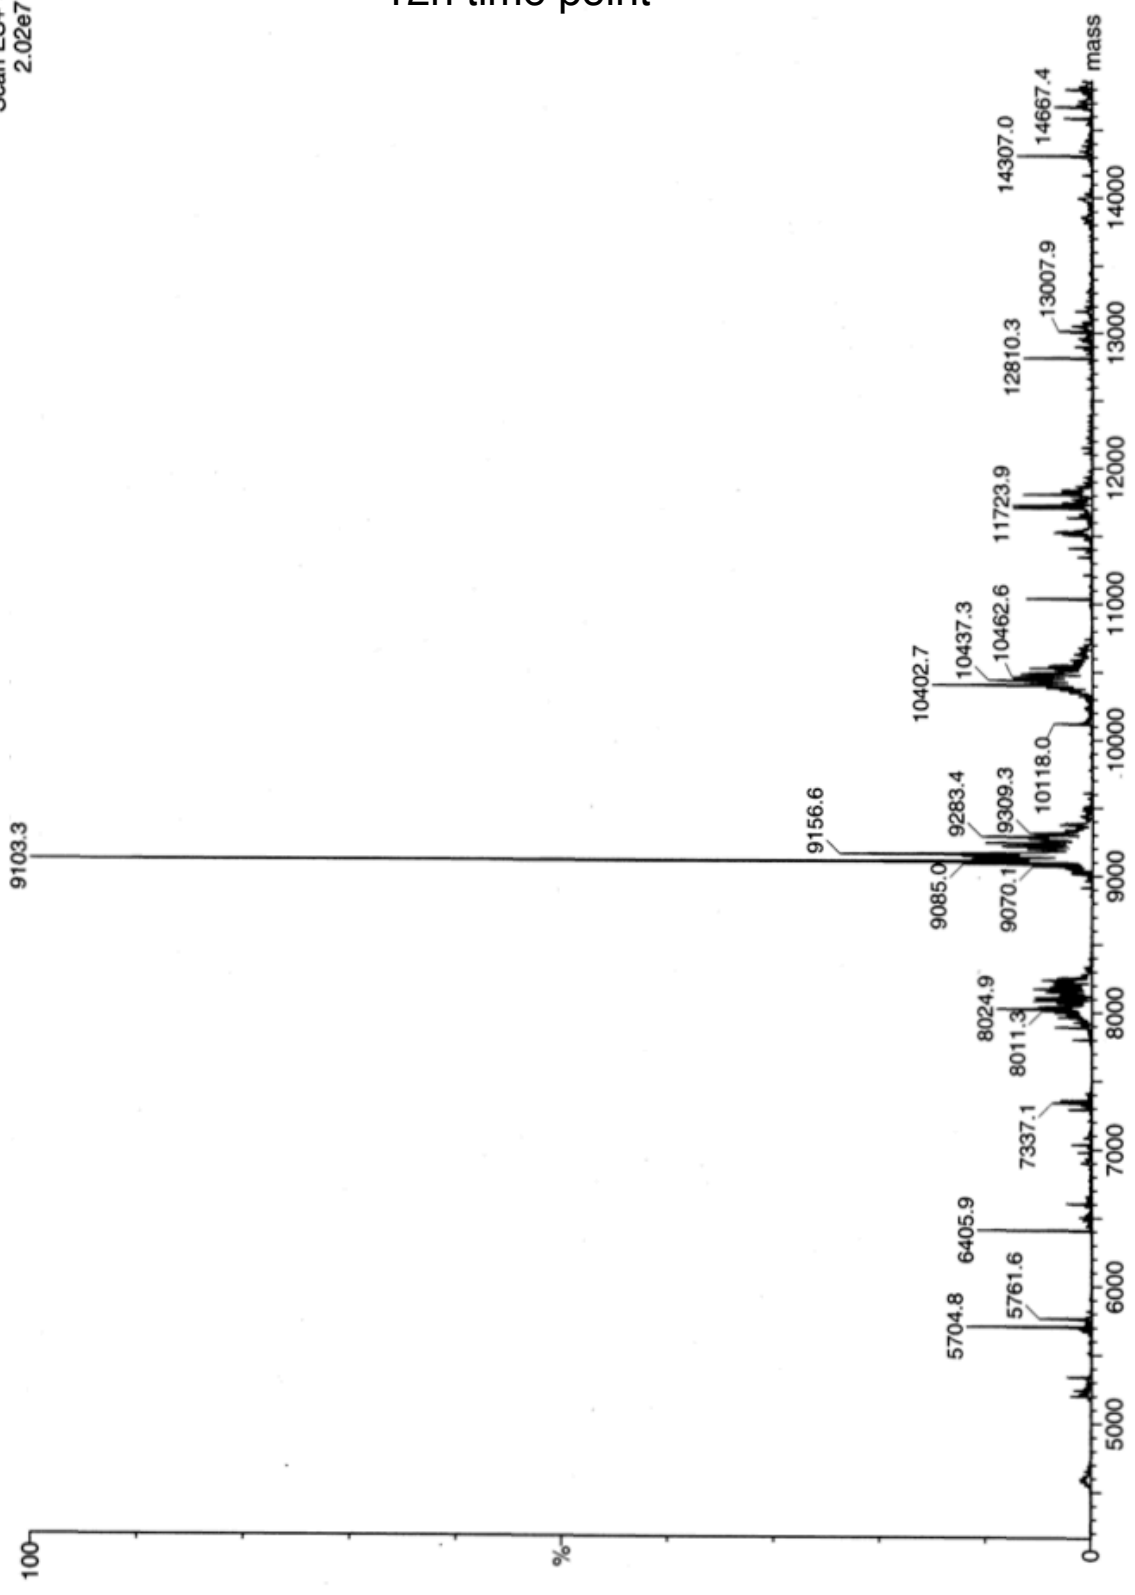

Scan ES+  
2.19e7

24 h time point

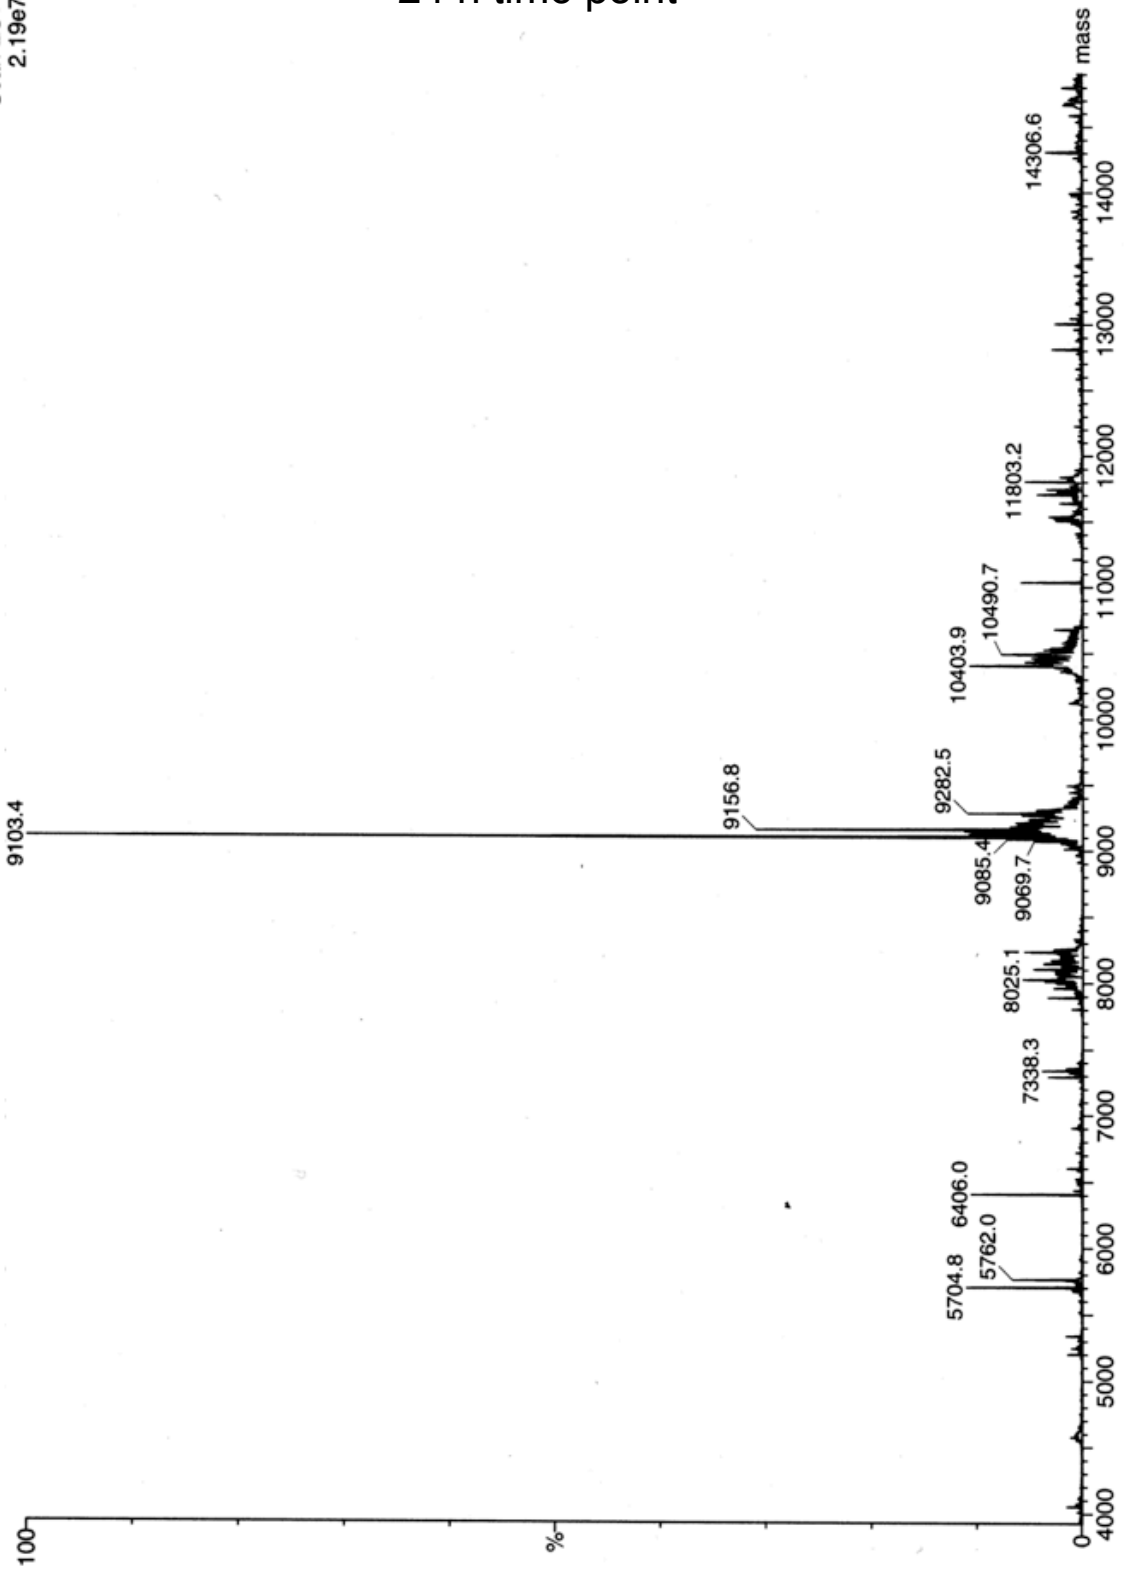

(b)

## Radiolabel [<sup>3</sup>H] incorporation

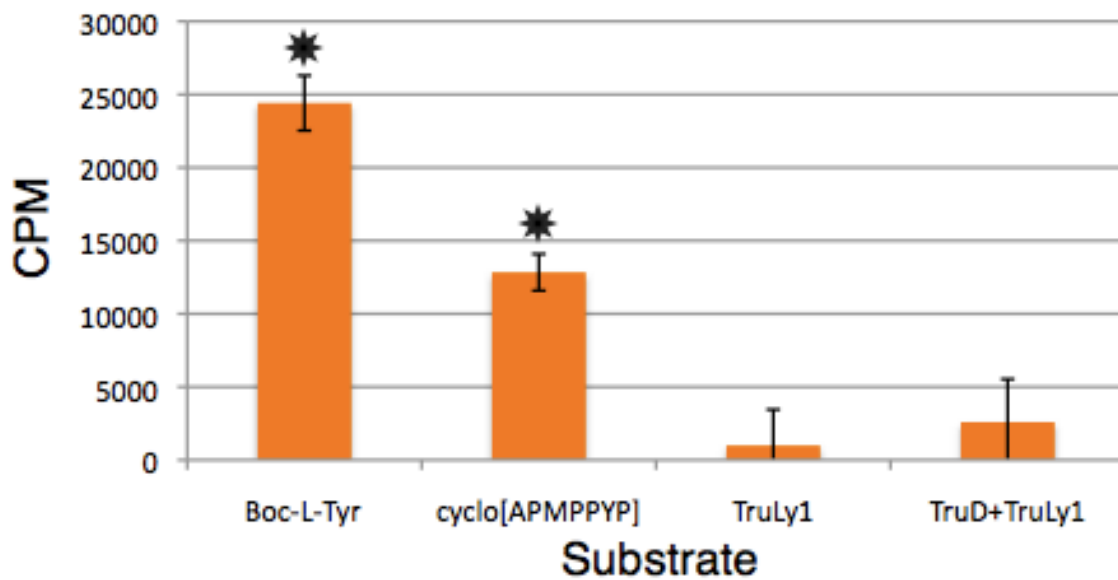

\* = Significantly different from buffer control on 99.9% confidence interval

**Figure S3.** NMR characterization of substrates cyclo[APMPPYP] and boc-L-tyrosine (a) HSQC of cyclo[APMPPYP] (b) HSQC of prenylated cyclo[APMPPYP] (c) Overlay of (a) and (b) data (d) table of assignments (e) HSQC of C-prenyl boc-L-Tyr (f) Table of assignments and numbered structure

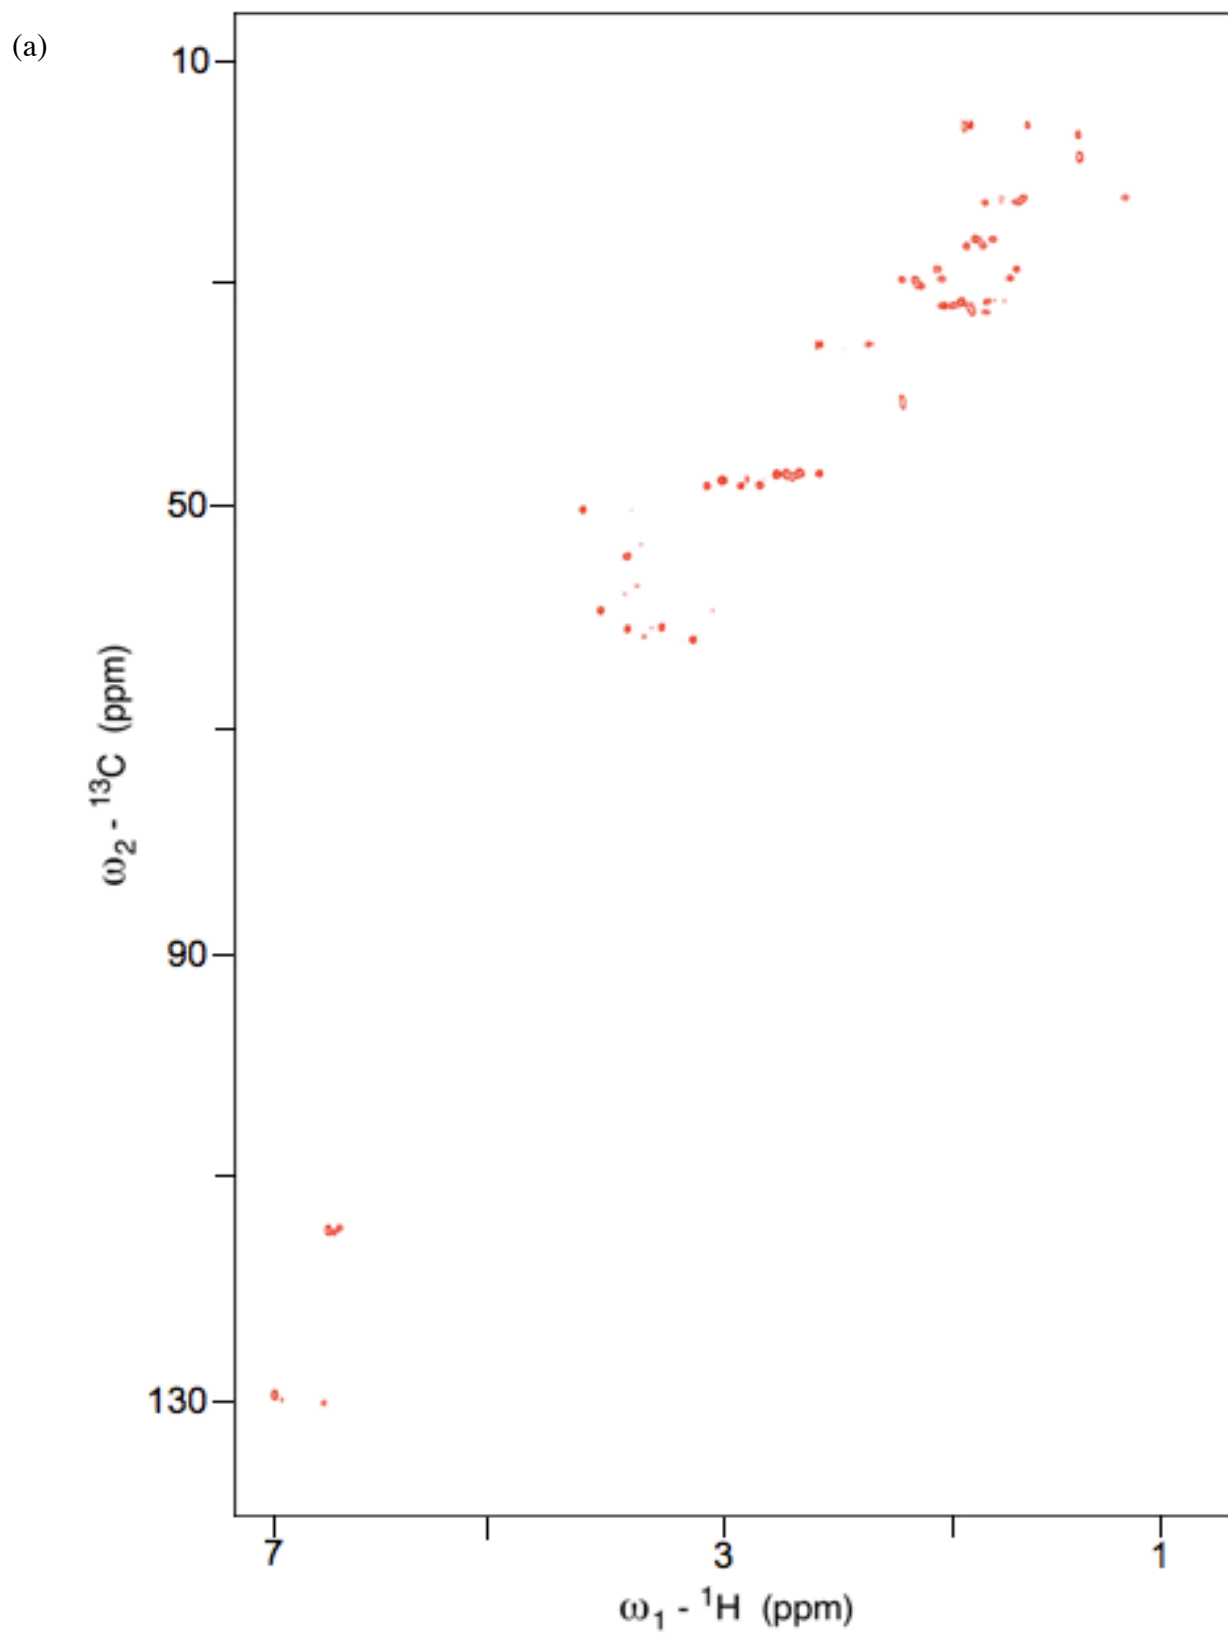

(b)

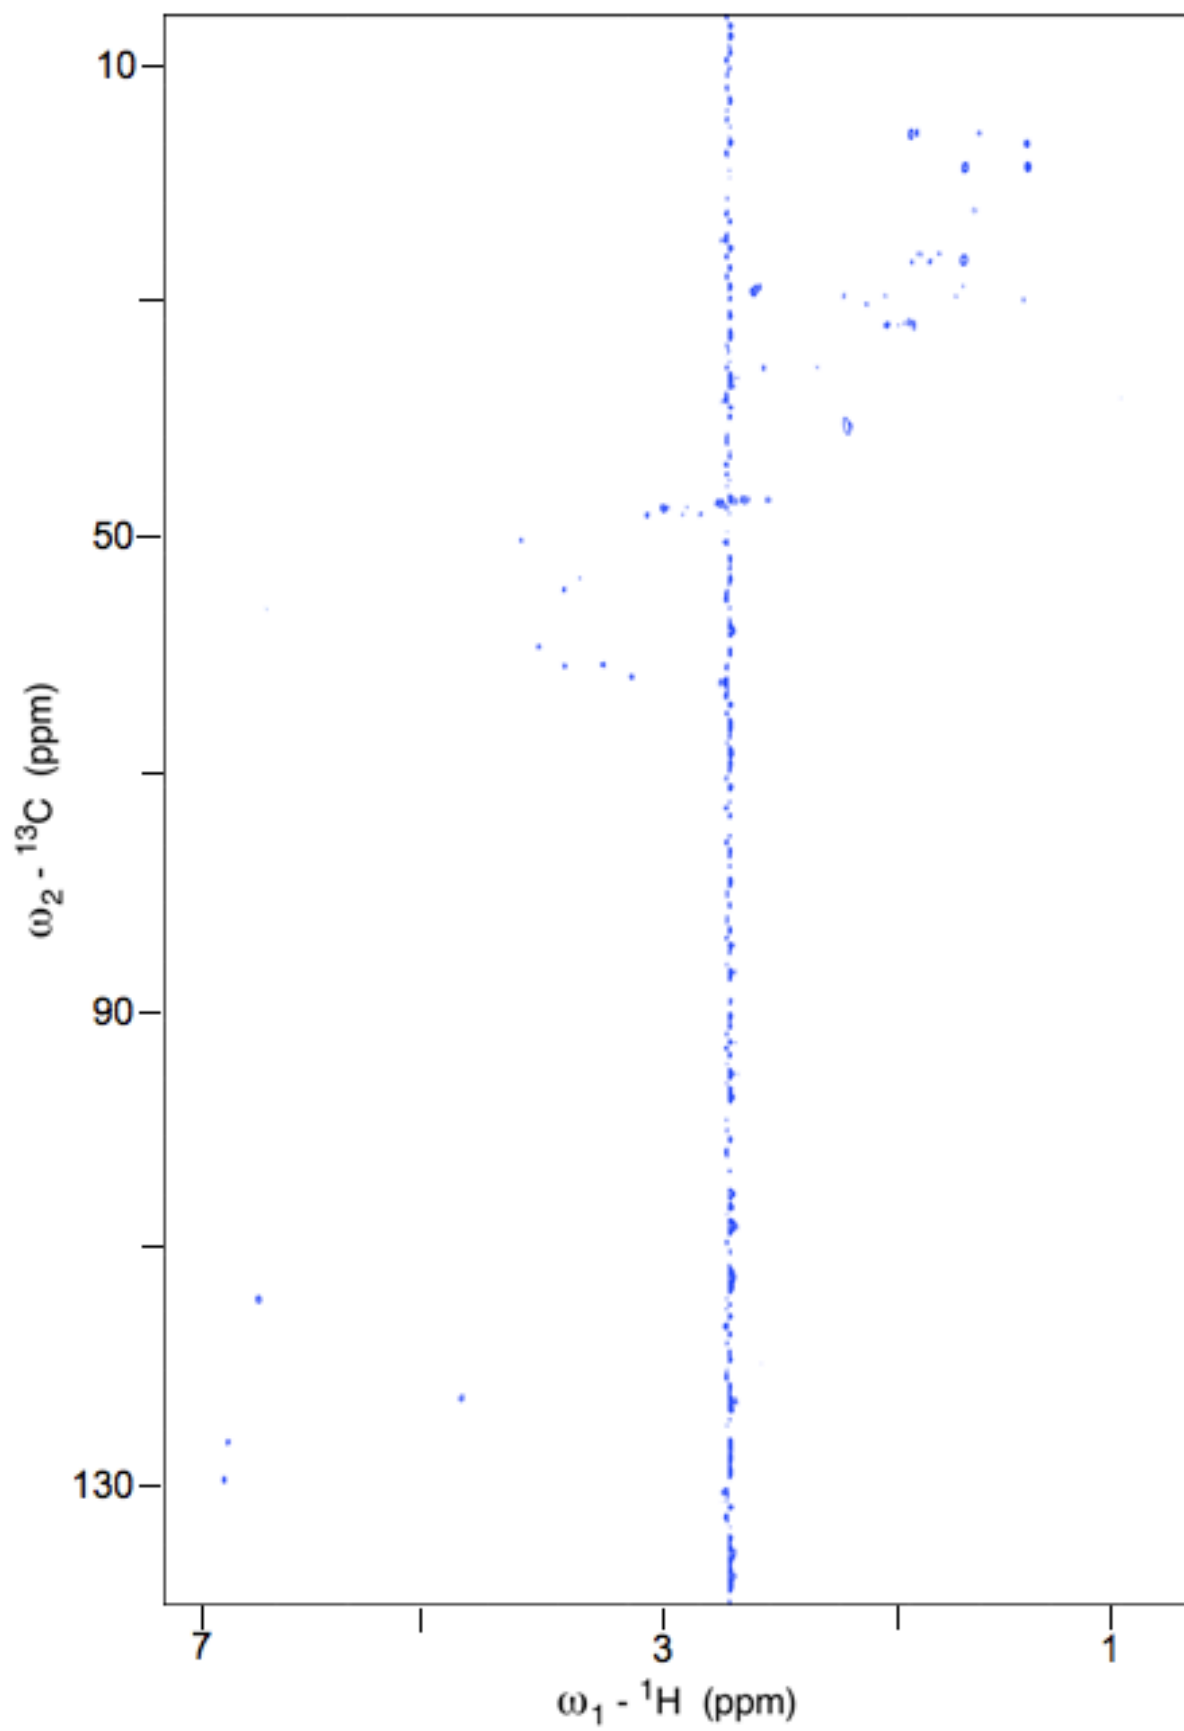



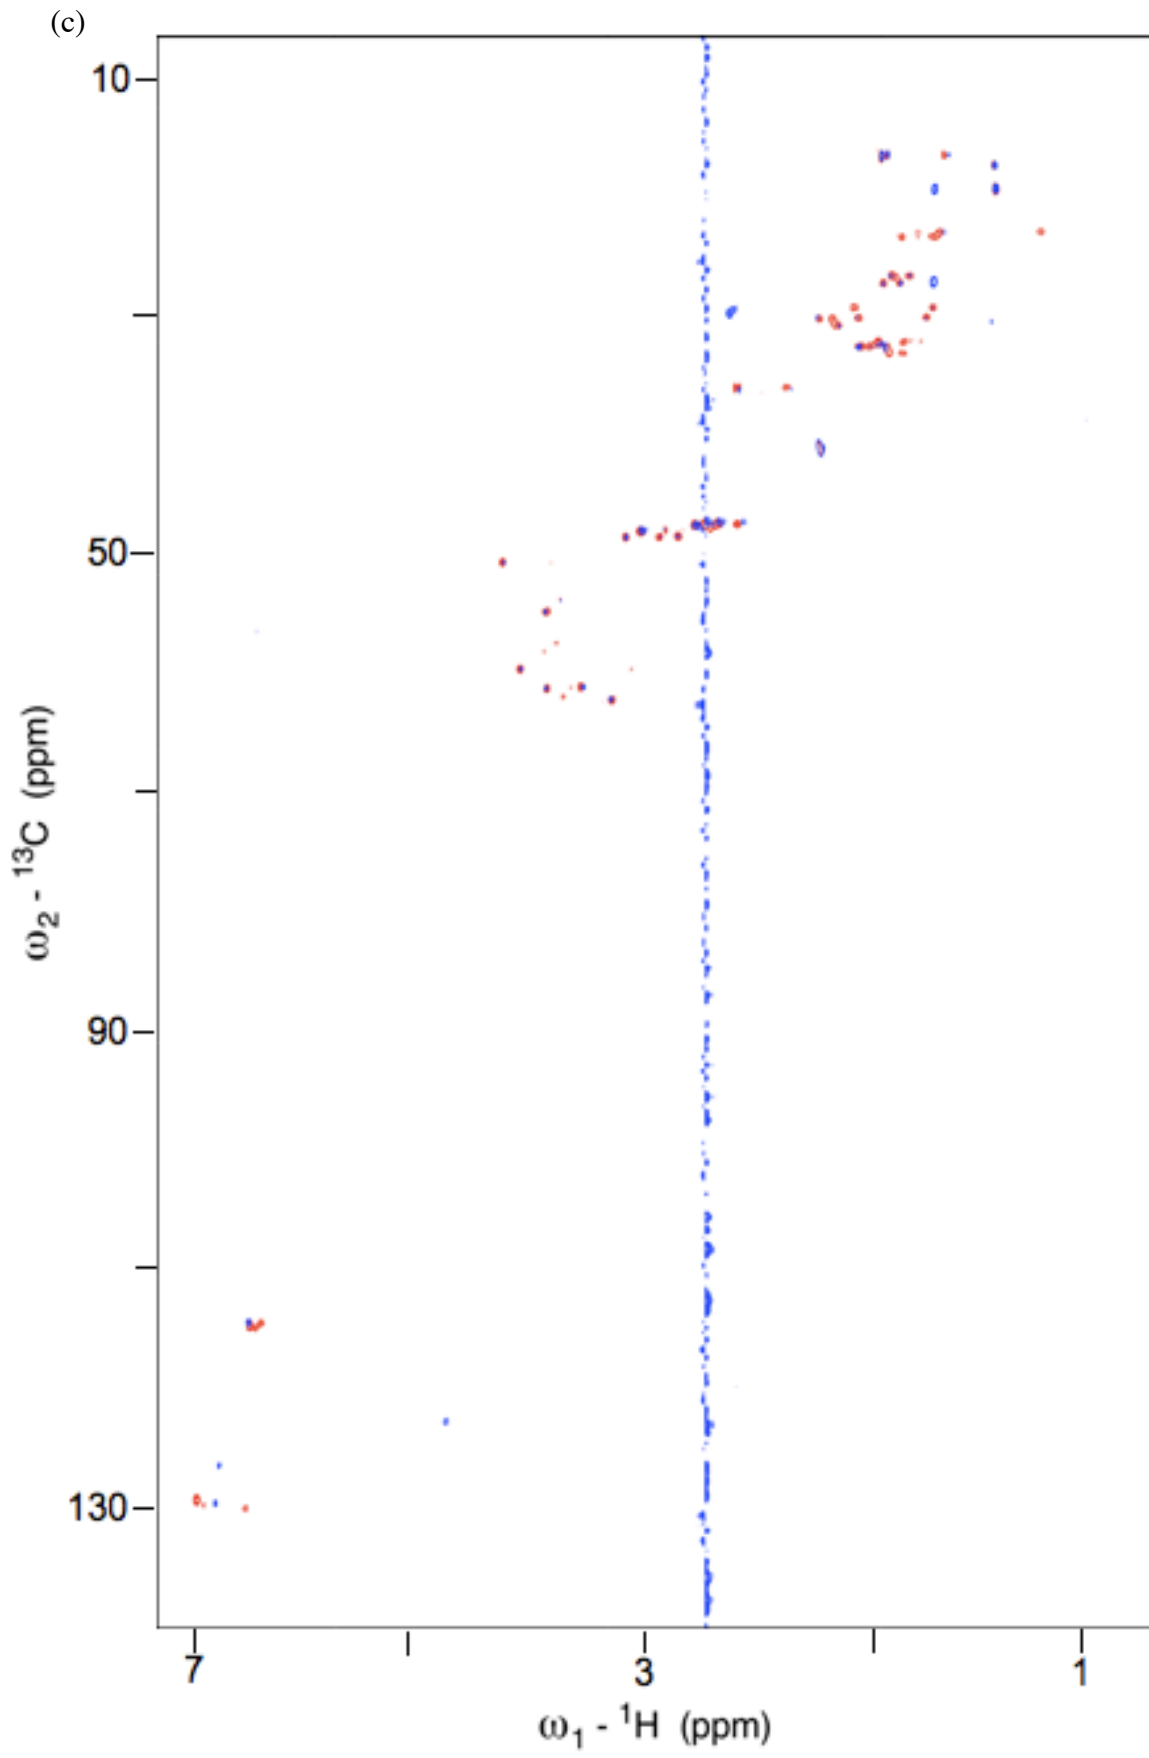

(d)

| cyclo[APMPPYP] unmod        | 13C    | 1H   | cyclo[APMPPY*P] product                      | 13C    | 1H   |
|-----------------------------|--------|------|----------------------------------------------|--------|------|
| Tyr C $\delta$              | 129.86 | 7.06 | Tyr C $\delta$ 1                             | 130.08 | 6.92 |
| Tyr C $\epsilon$            | 114.96 | 6.67 | Tyr C $\delta$ 2                             | 126.85 | 6.89 |
| Pro C $\alpha$              | 61.12  | 4.01 | C2 of 3-methyl-2-buten-1-yl adduct           | 122.9  | 5.23 |
| Pro C $\alpha$              | 60.15  | 4.25 | Tyr C $\epsilon$                             | 114.61 | 6.68 |
| Pro C $\alpha$              | 60.25  | 4.50 | Pro C $\alpha$                               | 61.07  | 4.02 |
| Pro C $\alpha$              | 58.64  | 4.69 | Pro C $\alpha$                               | 60.13  | 4.22 |
| Tyr C $\alpha$              | 53.66  | 4.50 | Pro C $\alpha$                               | 60.13  | 4.50 |
| Met C $\alpha$              | 49.52  | 4.82 | Pro C $\alpha$                               | 58.59  | 4.69 |
| Ala C $\alpha$              | 47.22  | 3.91 | Tyr C $\alpha$                               | 53.57  | 4.50 |
| Pro C $\delta$              | 47.22  | 3.67 | Met C $\alpha$                               | 49.48  | 4.81 |
|                             |        | 3.53 | Ala C $\alpha$                               | 47.24  | 3.91 |
| Pro C $\delta$              | 46.74  | 3.81 | Pro C $\delta$                               | 47.06  | 3.66 |
| Pro C $\delta$              | 46.12  | 3.41 |                                              |        | 3.53 |
|                             |        | 3.34 | Pro C $\delta$                               | 46.75  | 3.79 |
| Pro C $\delta$              | 46.09  | 3.24 |                                              |        | 3.62 |
|                             |        | 3.09 | Pro C $\delta$                               | 46.02  | 3.40 |
| DMSO                        | 39.51  | 2.49 | Pro C $\delta$                               | 45.79  | 3.22 |
| Tyr C $\beta$               | 34.53  | 3.11 |                                              |        | 3.05 |
|                             |        | 2.74 | DMSO                                         | 39.51  | 3.49 |
| Pro C $\beta$               | 31.4   | 1.98 | Tyr C $\beta$                                | 34.61  | 3.08 |
|                             |        | 1.88 |                                              |        | 2.70 |
| Met C $\gamma$              | 30.82  | 2.19 | C1 of 3-methyl-2-buten-1-yl adduct           | 28.13  | 3.15 |
|                             |        | 2.12 | Pro C $\beta$                                | 31.34  | 1.88 |
| Pro C $\beta$               | 30.48  | 2.07 |                                              | 30.87  | 2.02 |
|                             |        | 1.88 | Met C $\gamma$                               | 30.83  | 2.20 |
| Met C $\beta$               | 28.57  | 2.50 |                                              |        | 2.12 |
|                             |        | 2.40 | Pro C $\beta$                                | 30.52  | 2.05 |
| Pro C $\beta$               | 28.36  | 2.21 |                                              |        | 1.89 |
|                             |        | 1.71 | Met C $\beta$                                | 29.18  | 2.39 |
| Pro C $\beta$               | 27.68  | 2.24 | Pro C $\beta$                                | 28.45  | 2.21 |
|                             |        | 1.67 |                                              |        | 1.71 |
| Pro C $\gamma$              | 25.5   | 2.02 | Pro C $\beta$                                | 27.62  | 2.24 |
|                             |        | 1.91 |                                              |        | 1.67 |
| Pro C $\gamma$              | 24.89  | 1.96 | Pro C $\gamma$                               | 25.39  | 2.02 |
|                             |        | 1.83 |                                              |        | 1.90 |
| Pro C $\gamma$              | 21.5   | 1.89 | trans methyl of 3-methyl-2-buten-1-yl adduct | 25.27  | 1.65 |
|                             |        | 1.65 | Pro C $\gamma$                               | 24.82  | 1.97 |
| Pro C $\gamma$              | 21.14  | 1.77 |                                              |        | 1.83 |
|                             |        | 1.61 | Pro C $\gamma$                               | 21.43  | 1.91 |
| Ala C $\beta$ (rotamers)    | 17.32  | 1.20 |                                              |        | 1.62 |
|                             | 15.42  | 1.21 | Pro C $\gamma$                               | 21.03  | 1.77 |
| Met C $\epsilon$ (rotamers) | 14.54  | 2.03 |                                              |        | 1.58 |
|                             |        | 1.99 | cis methyl of 3-methyl-2-buten-1-yl adduct   | 17.31  | 1.65 |
|                             |        | 1.58 | Ala C $\beta$ (rotamers)                     | 17.31  | 1.20 |
|                             |        |      |                                              | 15.45  | 1.21 |
|                             |        |      | Met C $\epsilon$ (rotamers)                  | 14.06  | 2.03 |
|                             |        |      |                                              |        | 1.99 |
|                             |        |      |                                              |        | 1.55 |

(e)

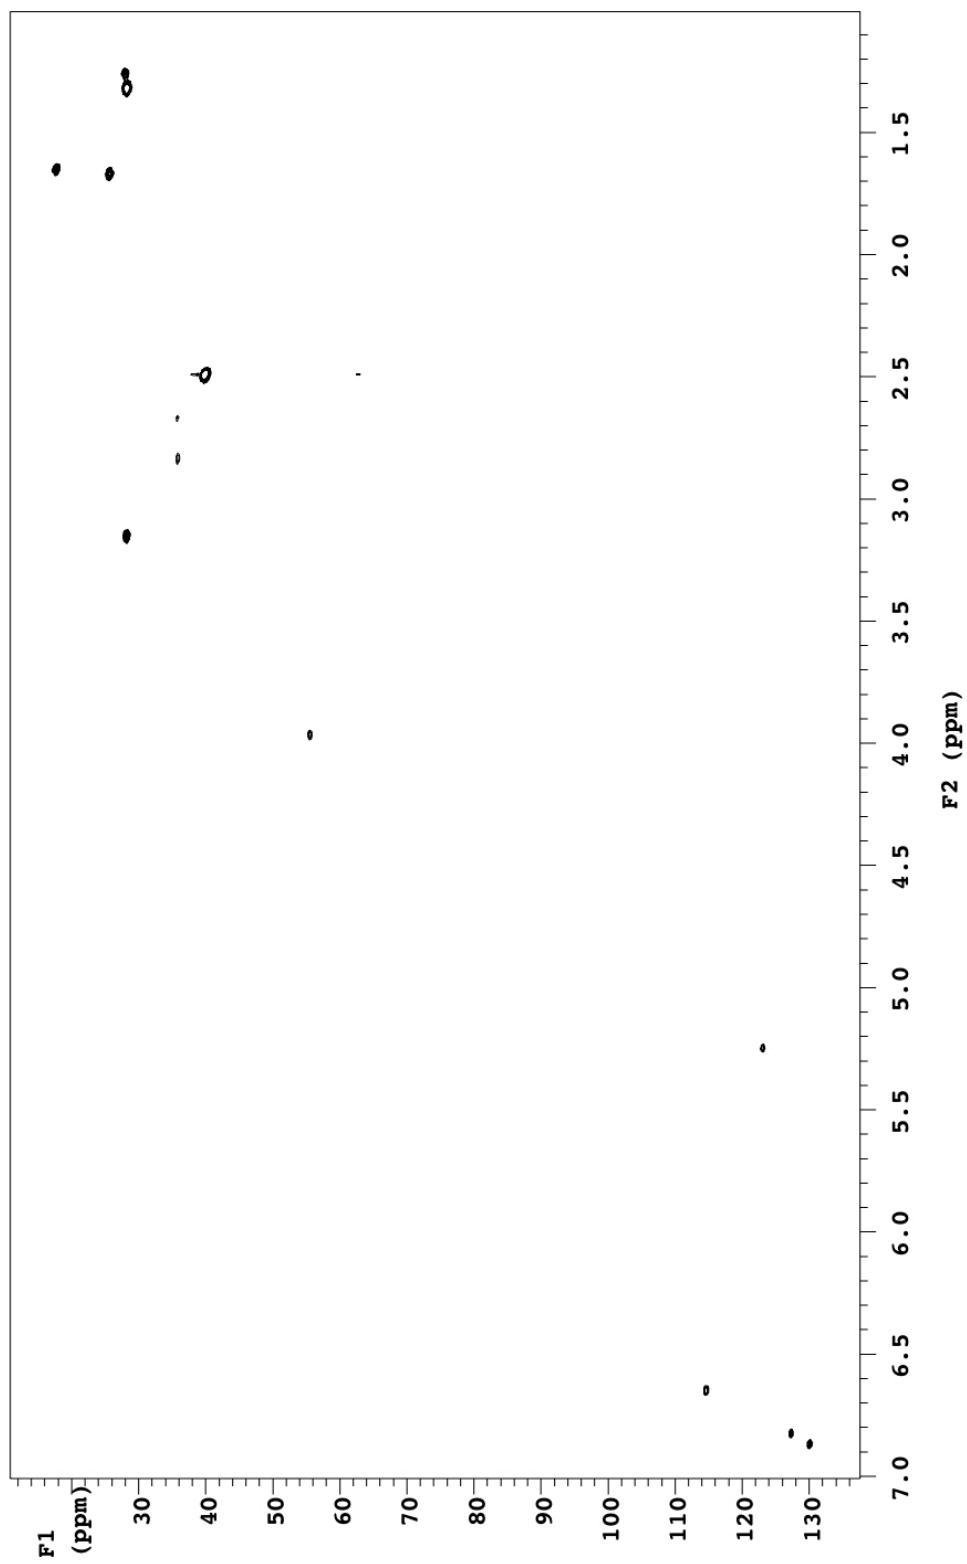

(f)

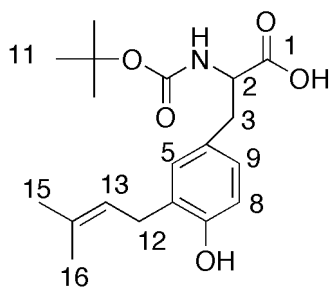

| Position | $\delta$ 13C | $\delta$ 1H |
|----------|--------------|-------------|
| 5        | 129.5        | 6.87        |
| 9        | 126.8        | 6.82        |
| 13       | 122.6        | 5.25        |
| 8        | 114.2        | 6.65        |
| 2        | 55.0         | 3.96        |
| DMSO     | 39.5         | 2.49        |
| 3a       | 35.5         | 2.66        |
| 3b       | 35.5         | 2.83        |
| 12       | 27.9         | 3.15        |
| 11a      | 27.7         | 1.32        |
| 11b      | 27.4         | 1.26        |
| 15       | 25.2         | 1.67        |
| 16       | 17.2         | 1.65        |

**Figure S4.** Spectral properties of C- and O-prenylated tyrosyl compounds (a) Left: LC-FT-ICR peaks and chromatograms selected for the mass of prenylated cyclo[APMPPYP] from unpurified reaction mixtures; note that two separable compounds corresponding to the mass of cyclo[APMPPYP] are present. Right: Analysis by LC-FT-ICR of the NMR-characterized C-prenylated cyclo[APMPPYP]; for this compound only a single peak with a mass corresponding to prenylated cyclo[APMPPYP] is observed (b) MS-MS spectra for early (top) and late (bottom) eluting-species observed in initial cyclo[APMPPYP] reaction mixtures and tables of assignments; assignments for early-eluting species consistent with C-prenylation, while those for the late-eluting species consistent with O-prenylation (c) Table of assignments for O- and C-prenylated compounds (d) MS-MS spectrum for NMR-characterized C-prenylated cyclo[APMPPYP]; MS-MS shows no loss of isoprene (e) Table of assignments for C-prenylated reference compound.

(a)

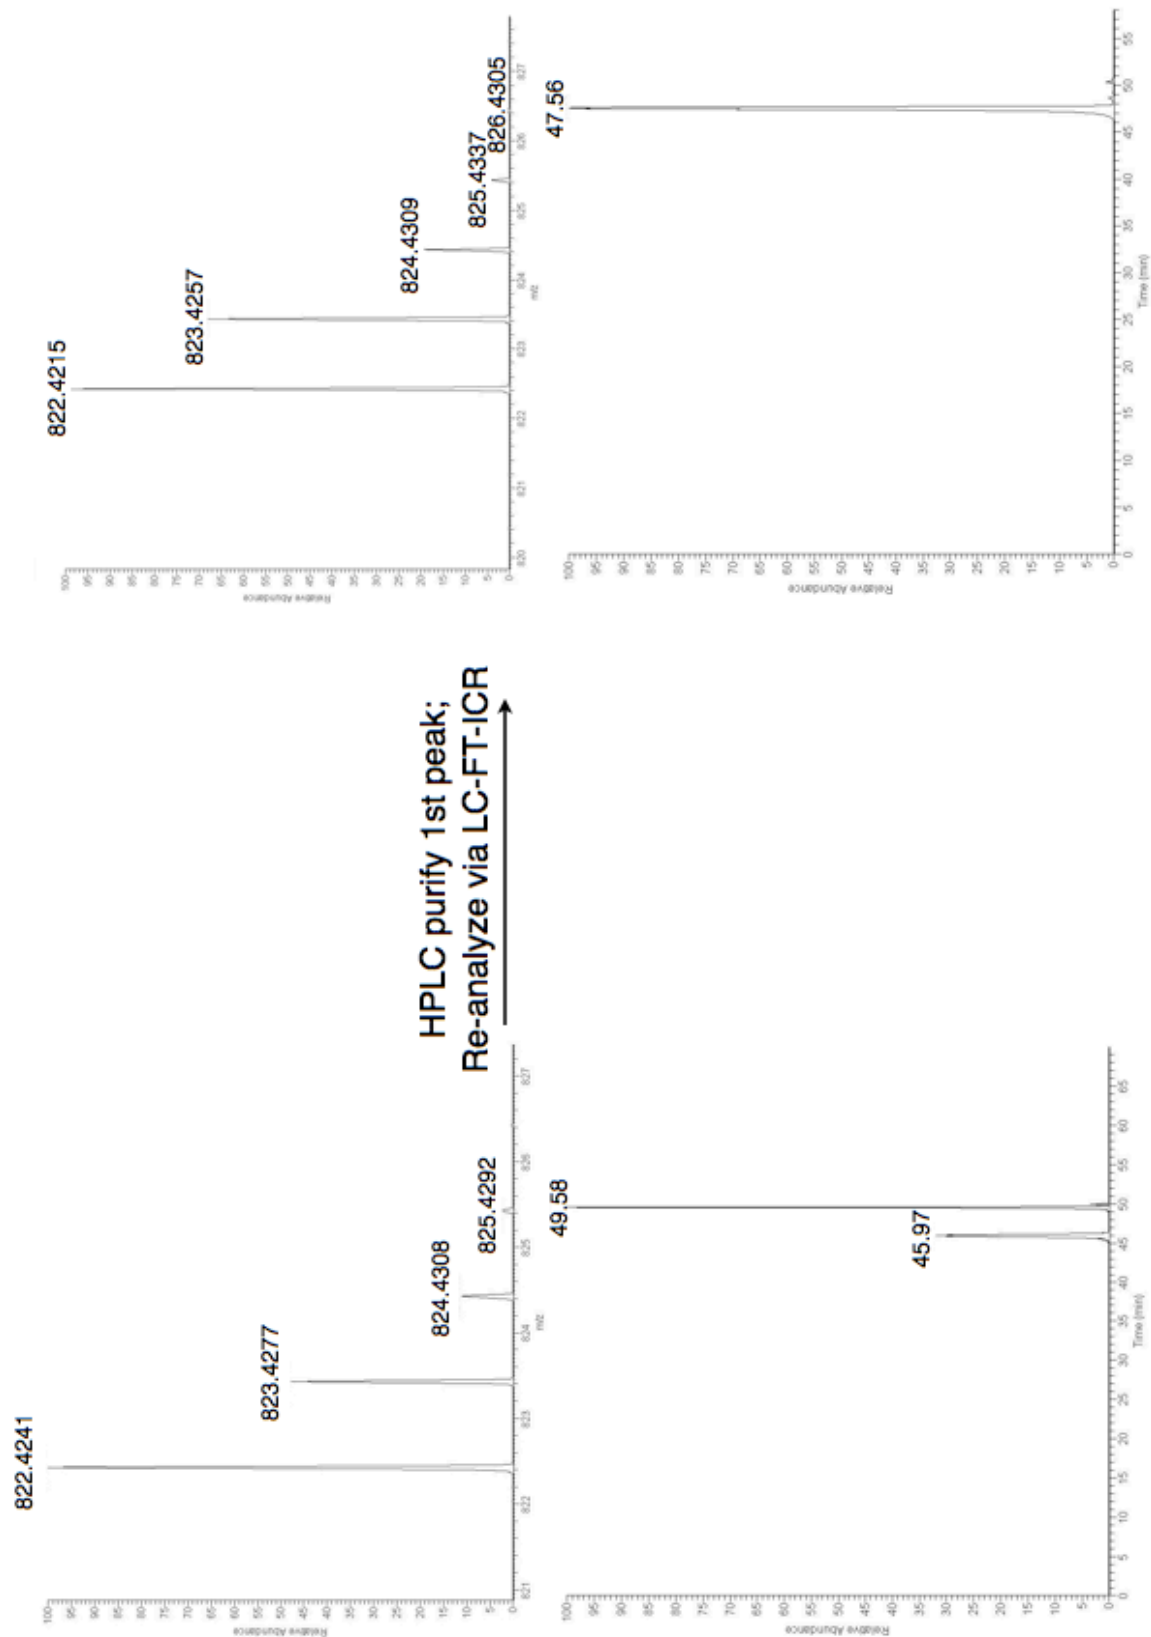

(b)

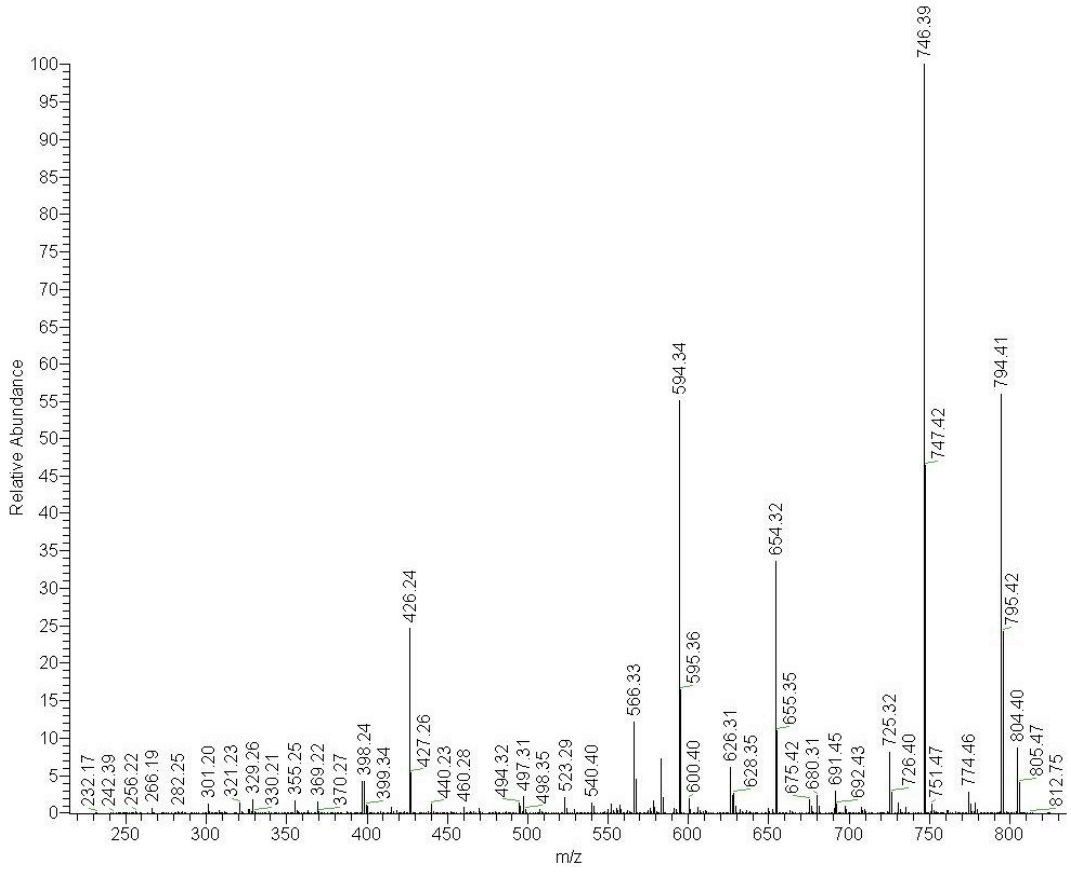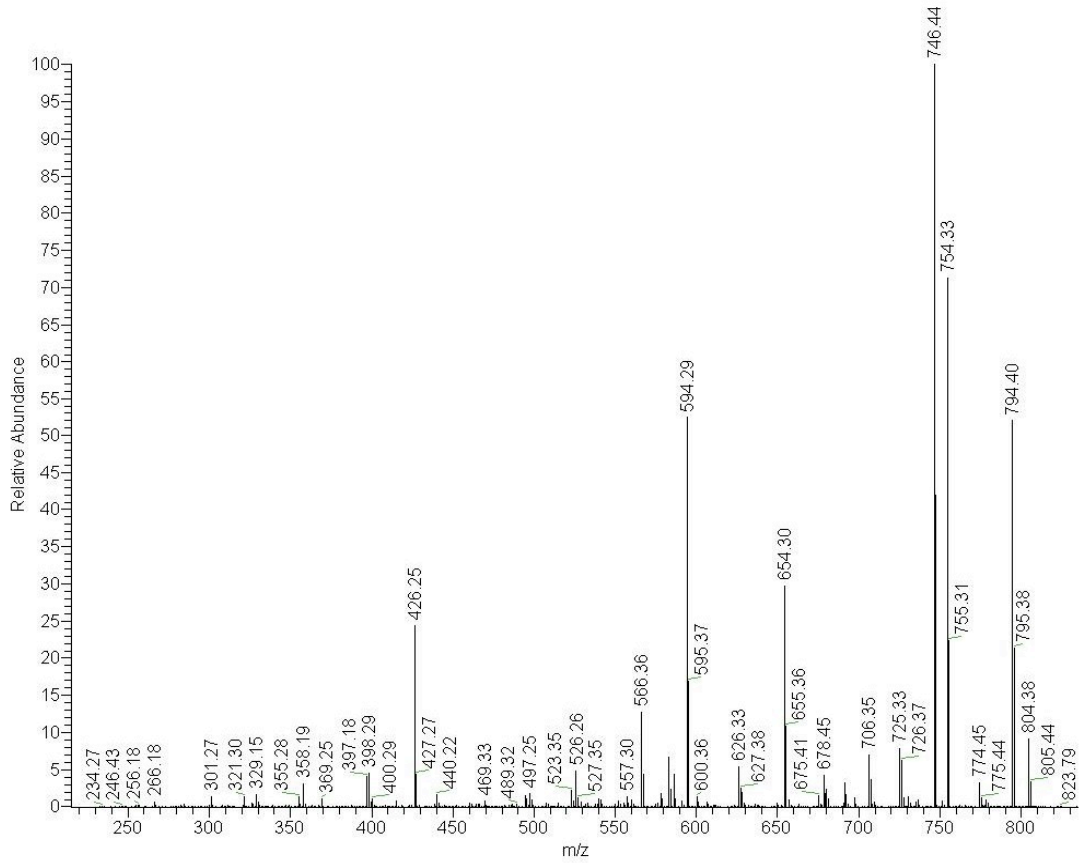

(c)

| <b>APMPPYP 1st peak (C-prenyl)</b> |                 |                 |
|------------------------------------|-----------------|-----------------|
| <b>b-ions (+1)</b>                 | <b>Expected</b> | <b>Observed</b> |
| <b>AP</b>                          | 169.10          | -               |
| <b>APM</b>                         | 300.14          | -               |
| <b>APMP</b>                        | 397.19          | 397.22          |
| <b>APMPP</b>                       | 494.24          | 494.33          |
| <b>APMPPy</b>                      | 725.37          | 725.31          |
| <b>y-ions (+1)</b>                 |                 |                 |
| <b>PMPPyP</b>                      | 769.39          | 769.36          |
| <b>MPPyP</b>                       | 672.34          | 672.27          |
| <b>PPyP</b>                        | 541.30          | 541.25          |
| <b>PyP</b>                         | 444.25          | 444.26          |
| <b>Py</b>                          | 347.19          | 347.23          |
| <b>y- b- cleavages (+1)</b>        |                 |                 |
| <b>Py</b>                          | 329.19          | 329.17          |
| <b>PPy</b>                         | 426.24          | 426.24          |
| <b>MPPy</b>                        | 557.28          | 557.25          |
| <b>y- a- cleavages (+1)</b>        |                 |                 |
| <b>Py</b>                          | 301.19          | 301.22          |
| <b>Miscellaneous Ions</b>          |                 |                 |
| <b>APMPPy a-cleavage +1</b>        | 697.37          | 697.31          |

| <b>APMPPYP 2nd peak (O-prenyl)</b> |                 |                 |
|------------------------------------|-----------------|-----------------|
| <b>b-ions (+1)</b>                 | <b>Expected</b> | <b>Observed</b> |
| <b>AP</b>                          | 169.10          | -               |
| <b>APM</b>                         | 300.14          | -               |
| <b>APMP</b>                        | 397.19          | 397.22          |
| <b>APMPP</b>                       | 494.24          | -               |
| <b>APMPPy</b>                      | 725.37          | 725.31          |
| <b>y-ions (+1)</b>                 |                 |                 |
| <b>PMPPyP</b>                      | 769.39          | 769.36          |
| <b>MPPyP</b>                       | 672.34          | 672.27          |
| <b>PPyP</b>                        | 541.30          | 541.25          |
| <b>PyP</b>                         | 444.25          | 444.26          |
| <b>Py</b>                          | 347.19          | 347.23          |
| <b>y- b- cleavages (+1)</b>        |                 |                 |
| <b>Py</b>                          | 329.19          | 329.17          |
| <b>PPy</b>                         | 426.24          | 426.24          |
| <b>MPPy</b>                        | 557.28          | 557.23          |
| <b>y- a- cleavages (+1)</b>        |                 |                 |
| <b>Py</b>                          | 301.19          | 301.22          |
| <b>Miscellaneous Ions</b>          |                 |                 |
| <b>All -prenyl</b>                 | 772.37          | 772.28          |
| <b>APMPPy a-cleavage +1</b>        | 697.37          | 697.29          |
| <b>APMPPy -prenyl</b>              | 657.31          | 657.26          |
| <b>PPyP -prenyl</b>                | 473.24          | 473.23          |



(d)

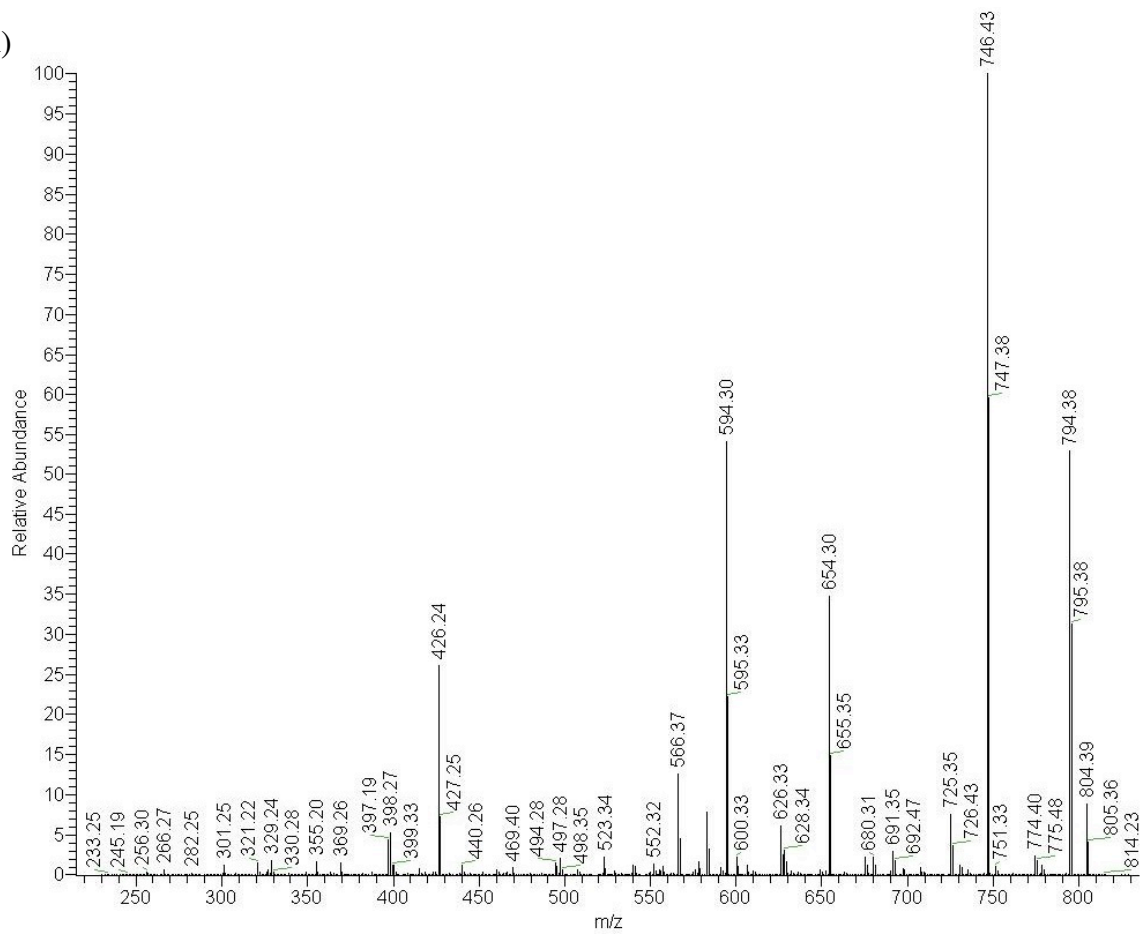

(e)

| cyclo[APMPPYP] NMR-characterized C-prenyl reference compound |          |          |                          |          |          |
|--------------------------------------------------------------|----------|----------|--------------------------|----------|----------|
| y- and b- cleavages (+1)                                     | Expected | Observed | y- and b- cleavages (+1) | Expected | Observed |
| AP                                                           | 169.10   | -        | yP                       | 329.19   | 329.24   |
| APM                                                          | 300.14   | -        | yPA                      | 400.22   | -        |
| APMP                                                         | 397.19   | 397.19   | yPAP                     | 497.28   | 497.24   |
| APMPP                                                        | 494.24   | 494.28   | yPAPM                    | 628.32   | 628.34   |
| APMPPy                                                       | 725.37   | 725.35   | yPAPMP                   | 725.37   | 725.35   |
| PM                                                           | 229.10   | -        | PA                       | 169.10   | -        |
| PMP                                                          | 326.15   | -        | PAP                      | 266.15   | 266.28   |
| PMPP                                                         | 423.21   | 423.35   | PAPM                     | 397.19   | 397.19   |
| PMPPy                                                        | 654.33   | 654.30   | PAPMP                    | 494.24   | 494.28   |
| PMPPyP                                                       | 751.39   | 751.32   | PAPMPP                   | 591.30   | -        |
| MP                                                           | 229.10   | -        |                          |          |          |
| MPP                                                          | 326.15   | -        | Miscellaneous Ions       |          |          |
| MPPy                                                         | 557.28   | 557.29   | -Acylium (C=O)           | 794.42   | 794.38   |
| MPPyP                                                        | 654.33   | 654.30   | -Methyl sulfide          | 774.42   | 774.40   |
| MPPyPA                                                       | 725.37   | 725.35   | -Met side-chain          | 746.39   | 746.43   |
| PP                                                           | 195.11   | -        | -H <sub>2</sub> O        | 804.41   | 804.39   |
| PPy                                                          | 426.24   | 426.24   | PyPAP y- a- cleavage     | 566.33   | 566.38   |
| PPyP                                                         | 523.29   | 523.34   | PAPM y- a- cleavage      | 369.20   | 369.21   |
| PPyPA                                                        | 594.33   | 594.30   | PAPM -Met sidechain      | 321.16   | 321.22   |
| PPyPAP                                                       | 691.38   | 691.35   | PAPM y- a- cleavage      | 301.19   | 301.25   |
| Py                                                           | 329.19   | 329.24   |                          |          |          |
| PyP                                                          | 426.24   | 426.24   |                          |          |          |
| PyPA                                                         | 497.28   | 497.28   |                          |          |          |
| PyPAP                                                        | 594.33   | 594.30   |                          |          |          |
| PyPAPM                                                       | 725.37   | 725.35   |                          |          |          |

**Figure S5.** Analysis of reverse O-prenylated intermediate and C-prenylated product (a) <sup>1</sup>H NMR of boc-D-Tyr reverse O-prenylated intermediate (b) 2D COSY spectrum of boc-D-Tyr reverse O-prenylated intermediate (c) <sup>1</sup>H NMR of boc-D-Tyr forward C-prenylated final product (d) circular dichroism spectral overlays of (top) boc-L-Tyr (blue) and boc-D-Tyr (red) and (bottom) C-prenyl boc-L-Tyr (blue) and C-prenyl boc-D-Tyr (red)

(a)

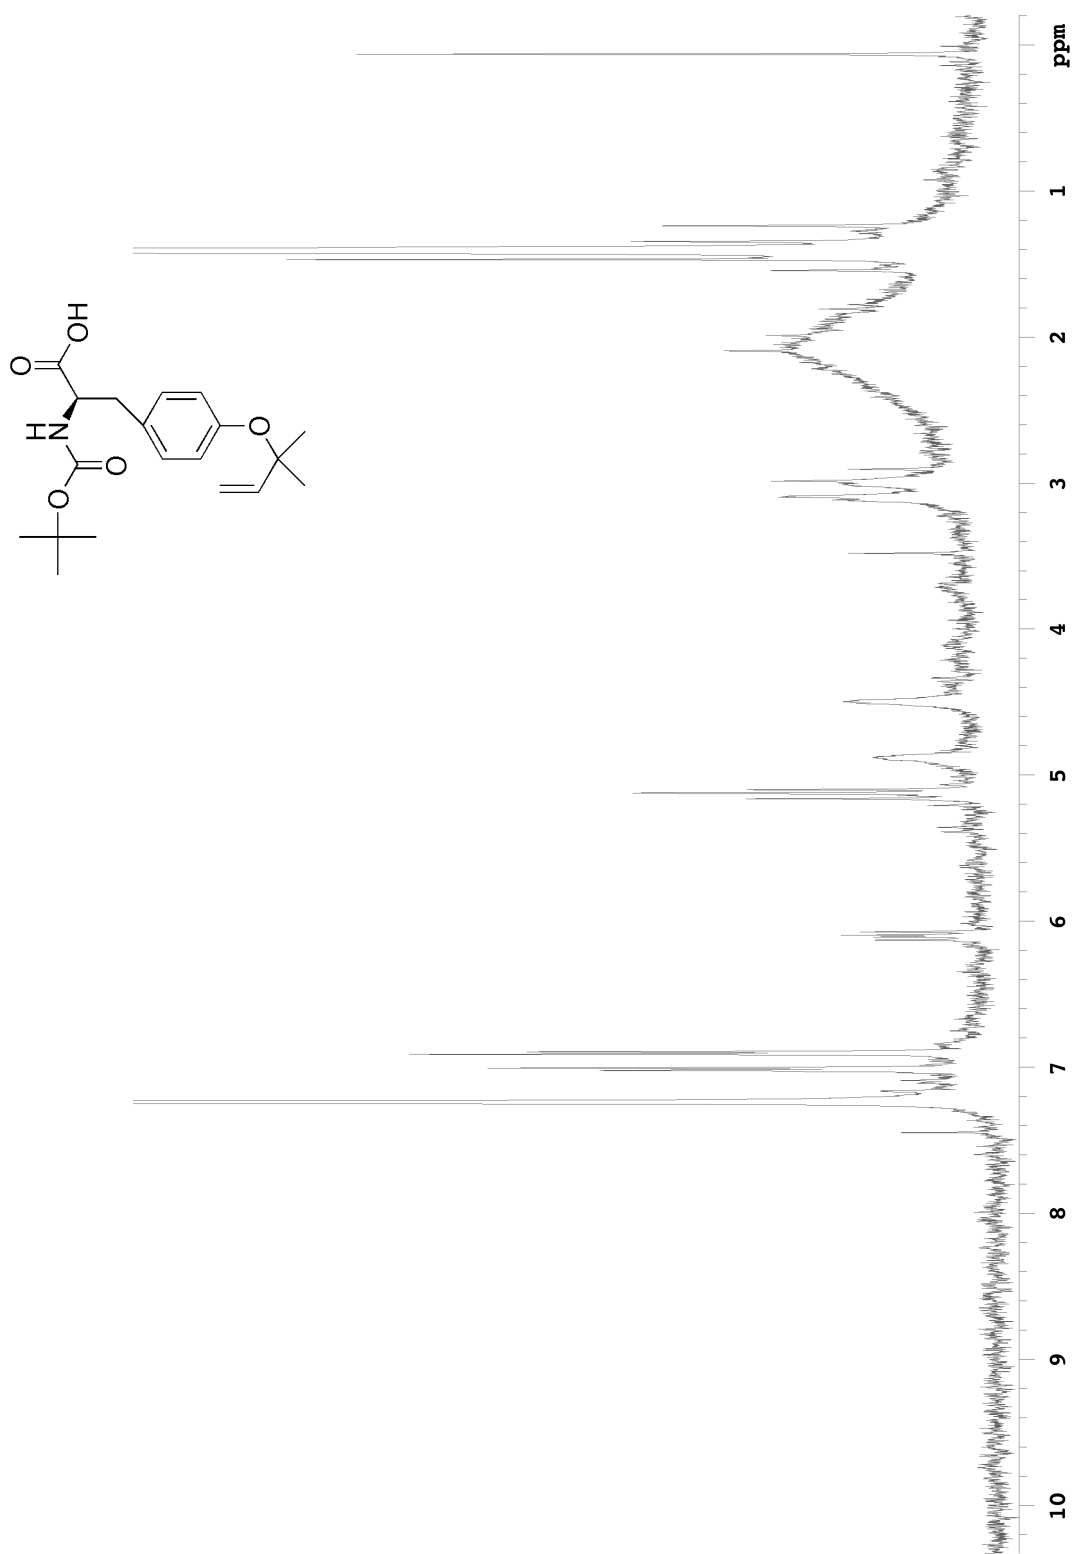

(b)

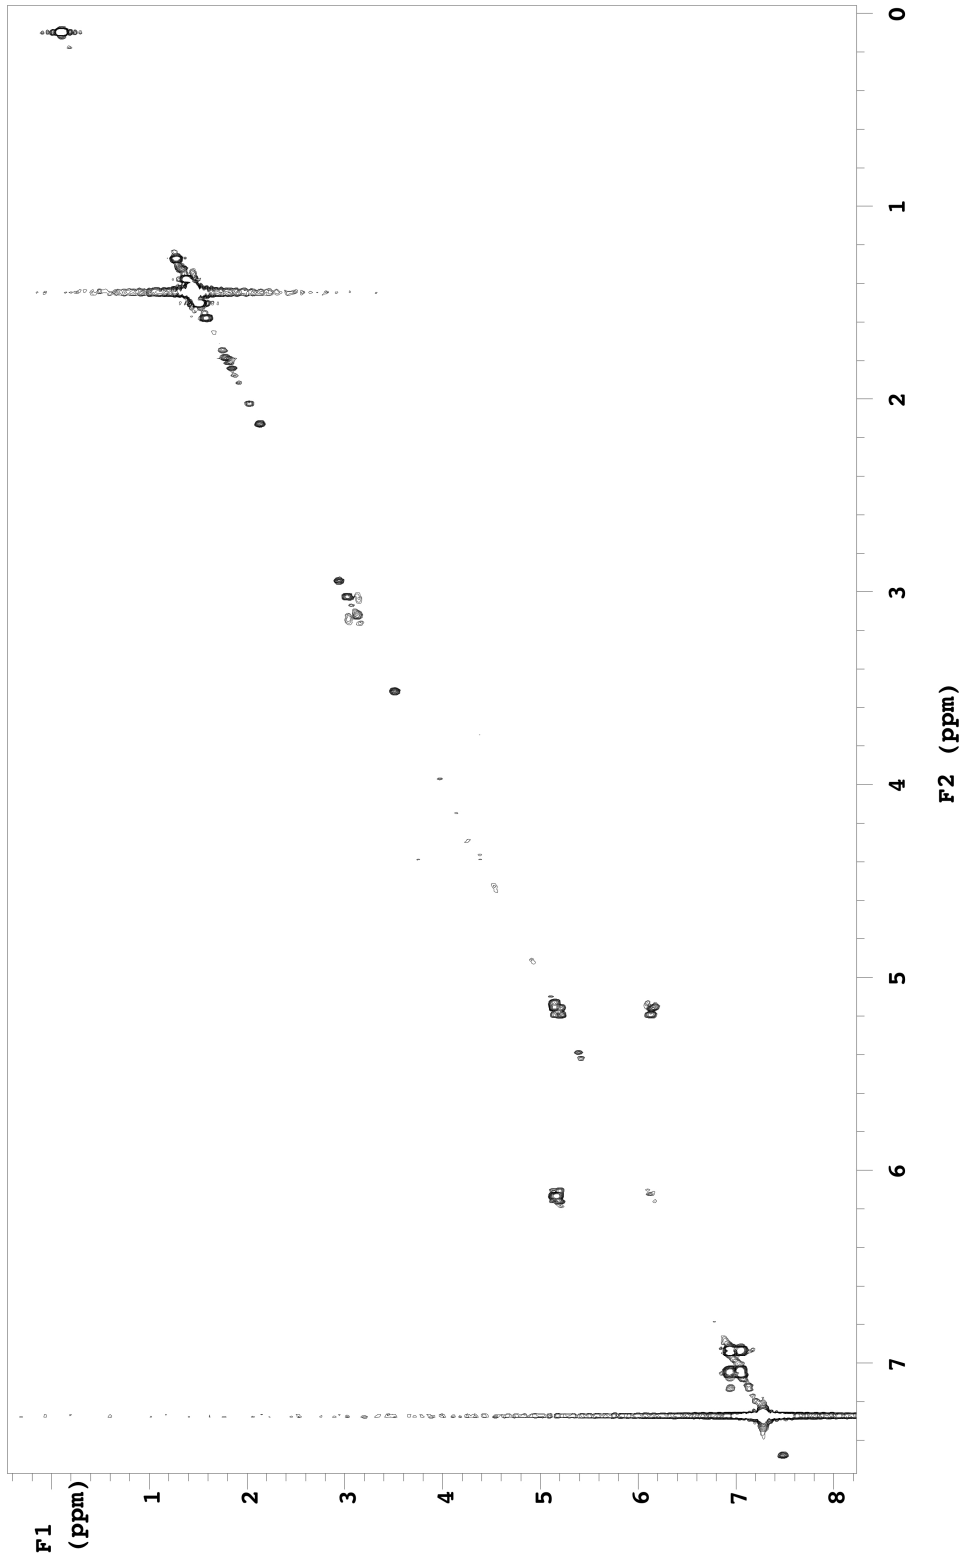

(c)

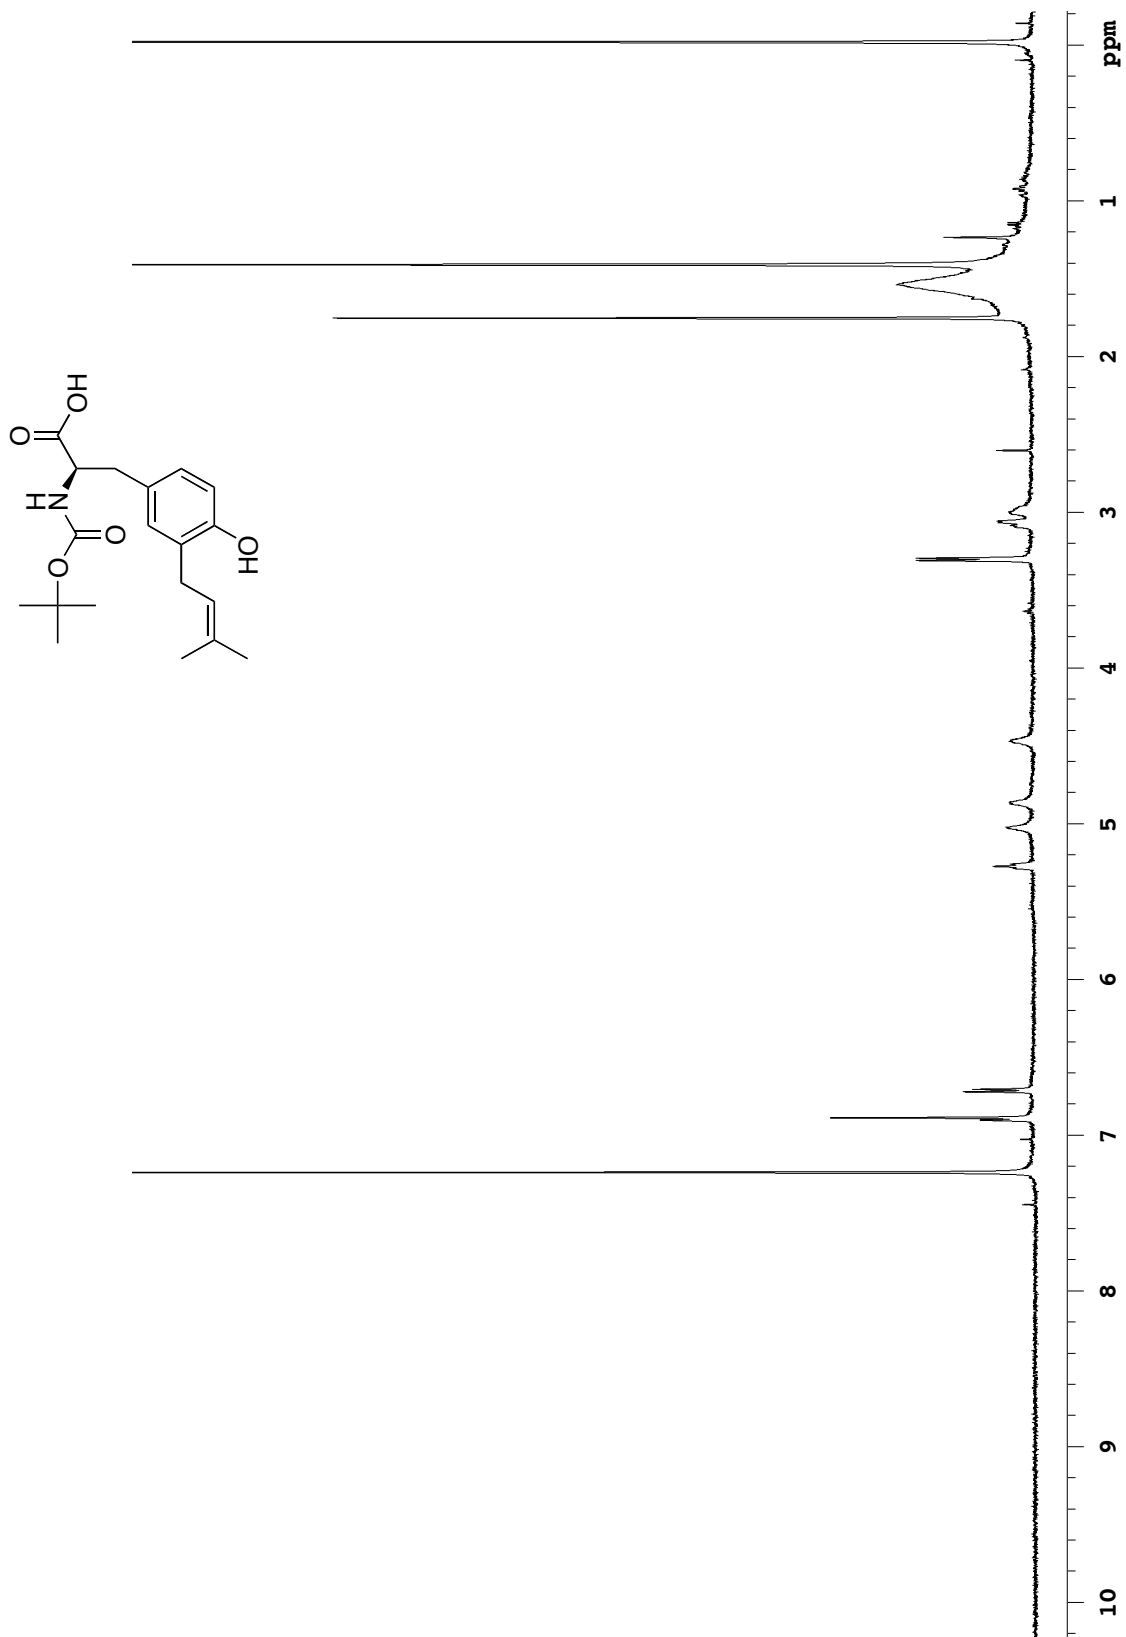

(d)

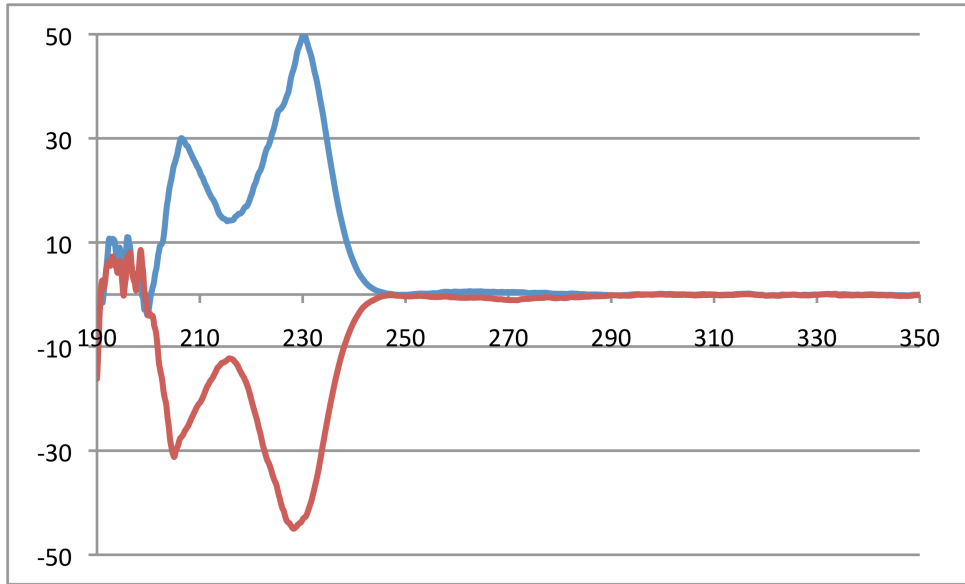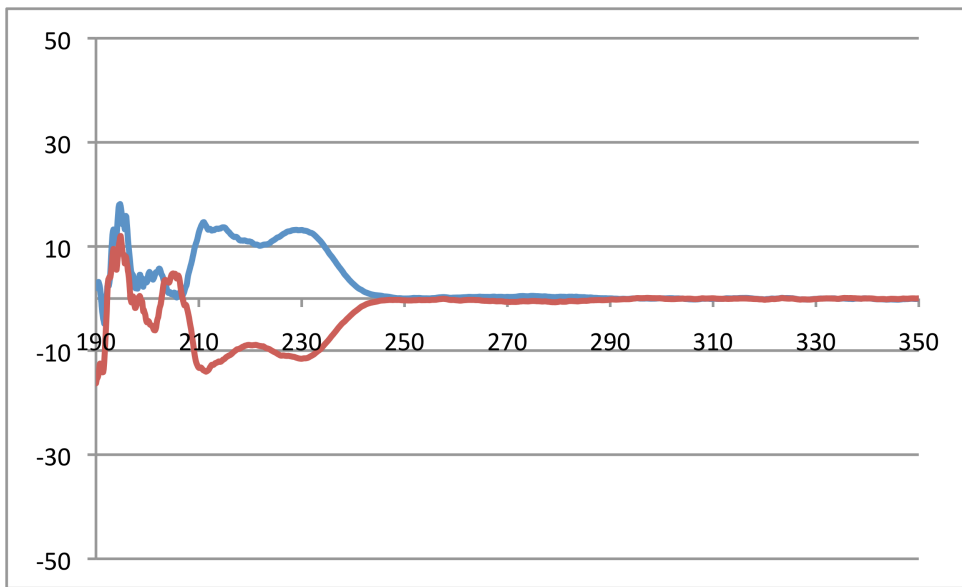

**Figure S6.** Non-enzymatic rearrangement of reverse O-prenylated tyrosine. Bar graph showing proportions of reverse O-prenylated intermediate and C-prenylated final product after incubation at 37 °C for 0 and 8 h under different conditions. The O-prenylated intermediate is sufficiently unstable that after isolation it was partially rearranged. Proportions of products determined by integration of A220 diode array trace of the relevant peaks, which are well-separated by HPLC.

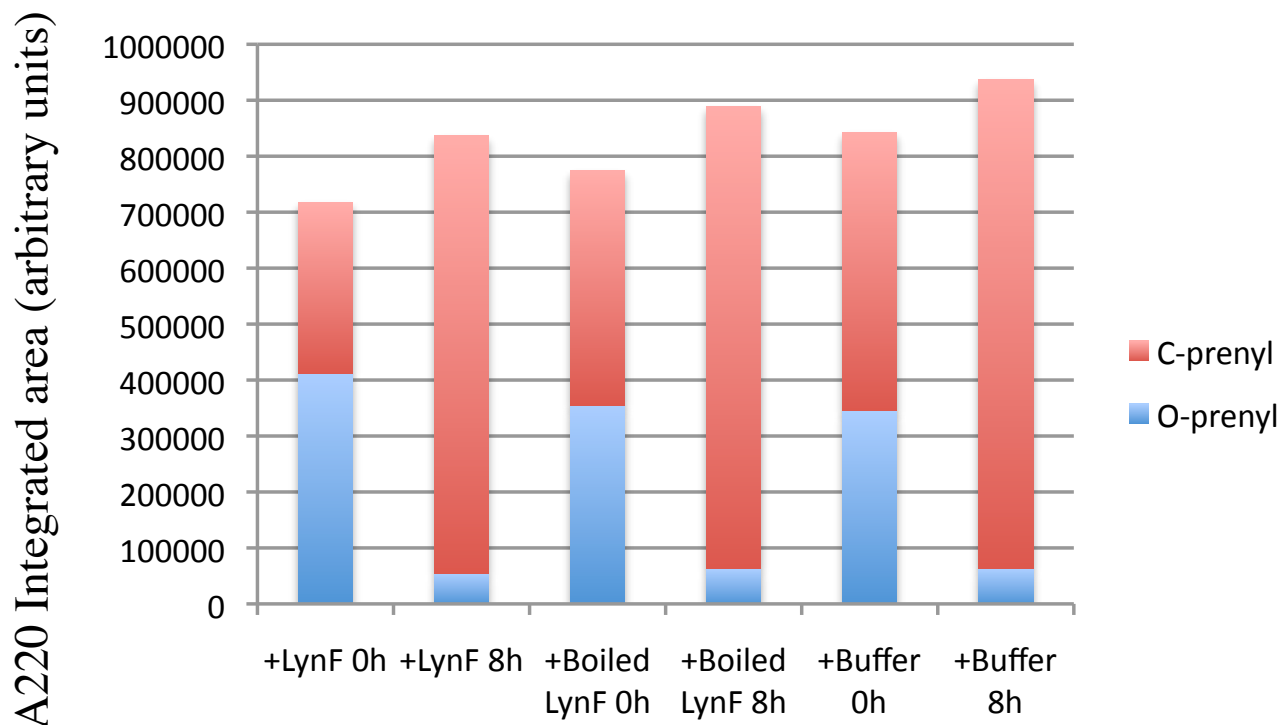



**Figure S7.** Kinetics of prenylation of cyclo[APMPPYP] and boc-L-tyrosine. Rates were measured by integration of product peaks observed in the monitoring of the HPLC elution 220 nm. Both the C- and O-prenylated products were summed to obtain the total amount of prenylated products at each point. Areas were then plotted on a calibration curve created via injections of known quantities of boc-L-Tyr to derive concentrations (a) Kinetics for reaction of Boc-L-Tyr with LynF (b) Kinetics for reaction of cyclo[APMPPYP] with LynF (c) Controls showing linearity of reaction rate through 6 h.

(a)

Best-fit values for Boc-L-Tyr kinetics

|                          |                          |
|--------------------------|--------------------------|
| Vmax                     | 5.7E-05 M/h              |
| Km                       | 14.0 mM                  |
| kcat                     | 63.3 h <sup>-1</sup>     |
| Std. Error               |                          |
| Vmax                     | 3.9E-06 M/h              |
| Km                       | 1.6 mM                   |
| 95% Confidence Intervals |                          |
| Vmax                     | 4.9e-005 to 6.6e-005 M/h |
| Km                       | 10.49 to 17.59 mM        |

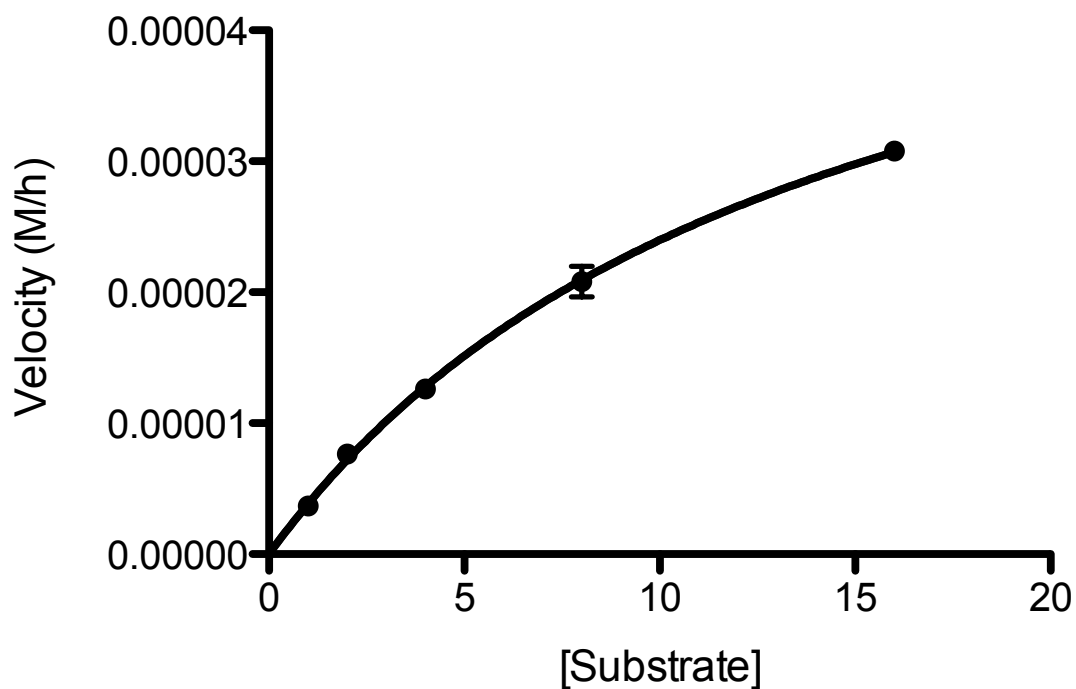

(b)

Best-fit values for cyclo[APMPPYP] kinetics

|                          |                        |
|--------------------------|------------------------|
| Vmax                     | 2.4E-05 M/h            |
| Km                       | 4.2 mM                 |
| kcat                     | 13 h <sup>-1</sup>     |
| Std. Error               |                        |
| Vmax                     | 8.3E-07 M/h            |
| Km                       | 0.4 mM                 |
| 95% Confidence Intervals |                        |
| Vmax                     | 2.2e-005 to 2.5e-005 M |
| Km                       | 3.4 to 5.0 mM          |

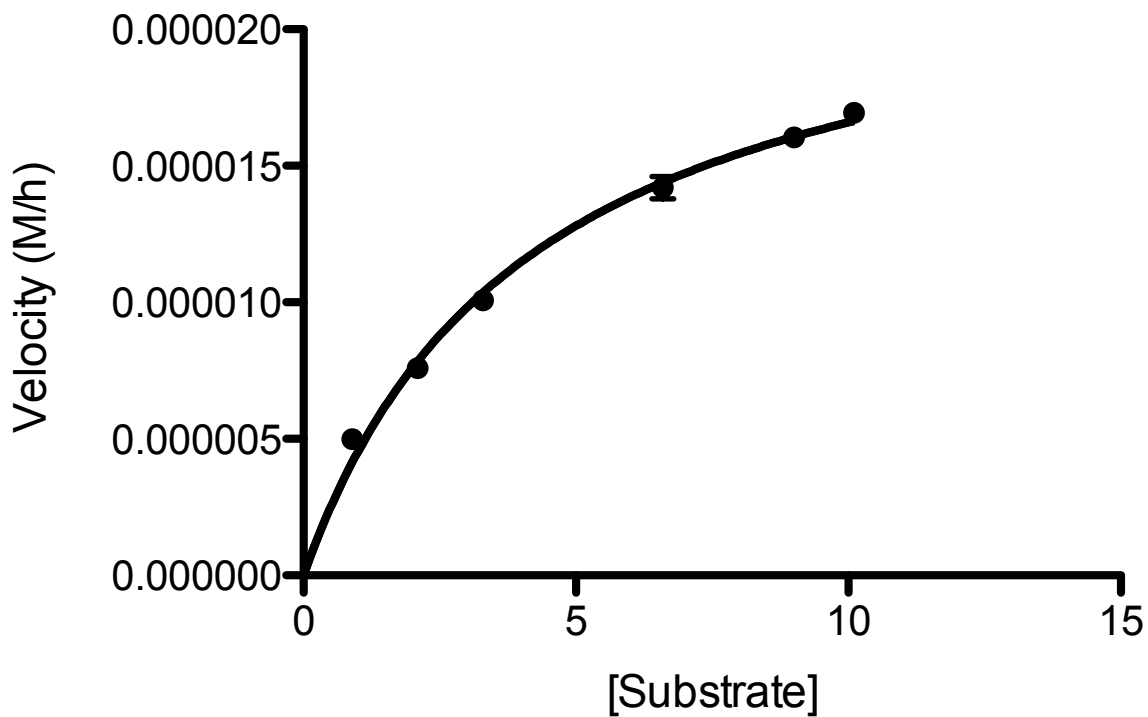

(c)

Integrated Area (arbitrary units)

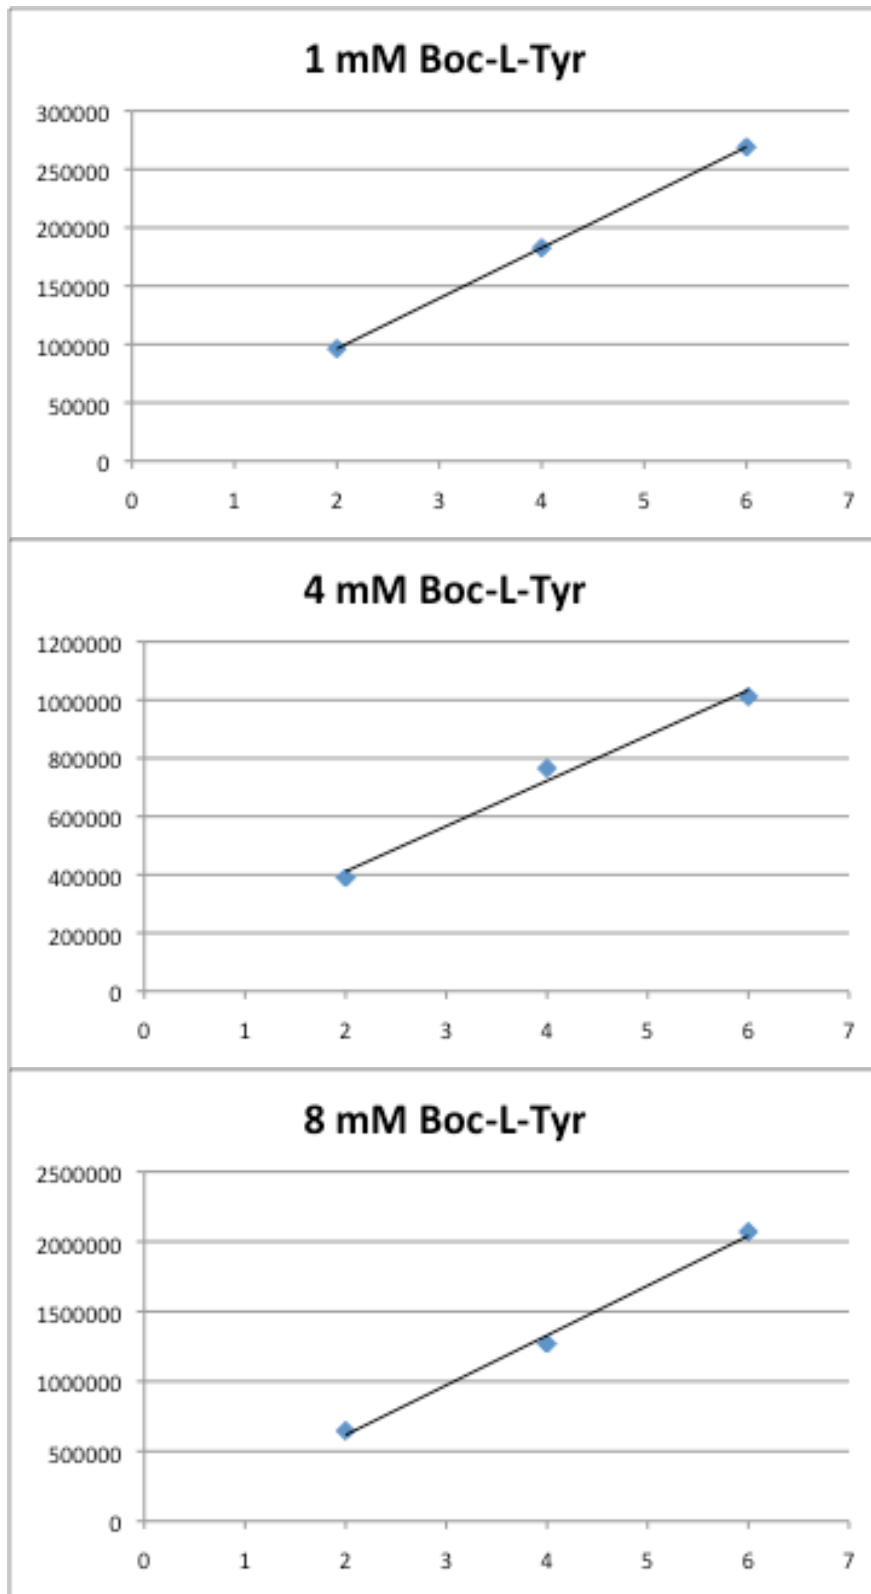

Time (h)

Integrated Area (arbitrary units)

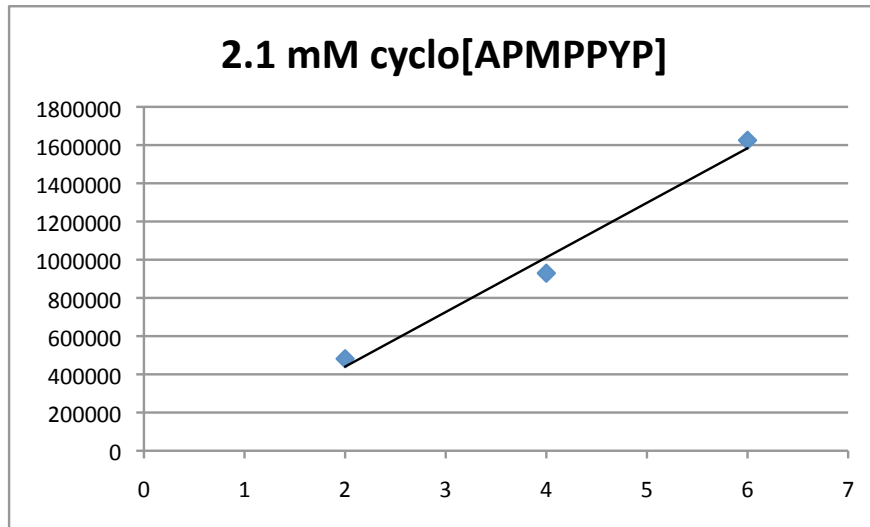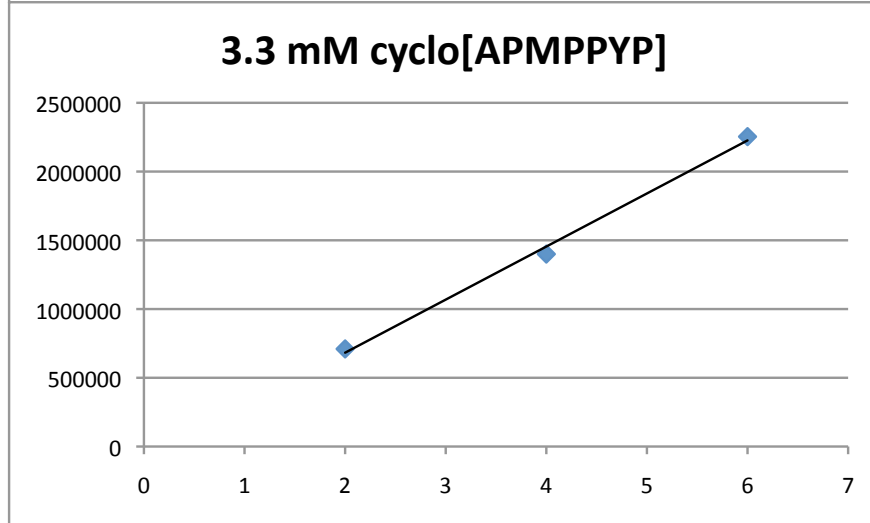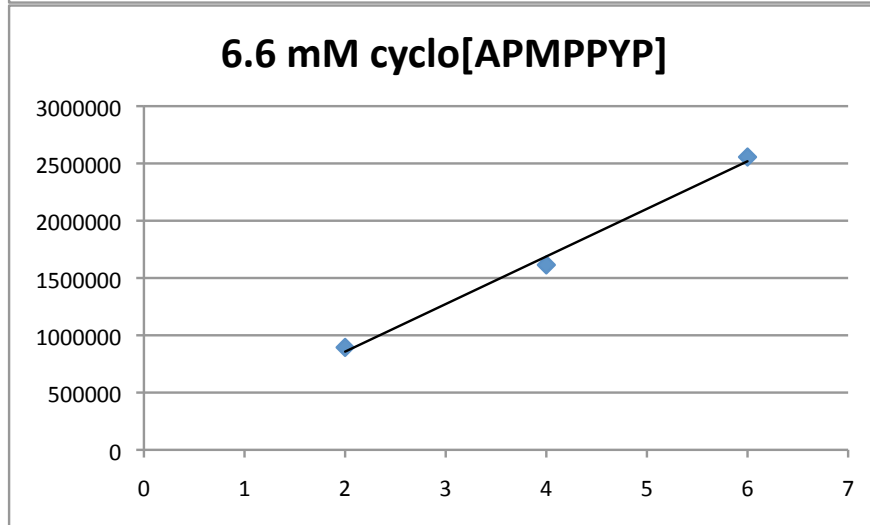

Time (h)

**Figure S8.** Multiple sequence alignments of LynF relatives. Highlighted in yellow are residues conserved across all known LynF homologues, in green are residues conserved across enzymes predicted to catalyze prenylation, in cyan are residues conserved across predicted non-prenylating enzymes

```

TruF1      -----MIMTTTWPDSYAKERRIQRLRHHFESFDVERAFPLPLFEQAVLSLSDSCPLL
LynF       -----MTIMAIANRVYPNYLREQRIQFMHAHQDAFDVSTVFPPLPLFEKLVTELEGSNVI
AcyF       -----MIANVTQKDRFQEOKLQFIRNHQQAQFDVEPIYPLPLFEDFVMNVEGDCSI
PagF       -----MIVNVIQKDRLEKQKQFIRNHQQAQFDVEPIYPLPLFEDFVTSIEGDCSL
Mic843F    -----MIVADIQKSSLKEQRLQFIRNHQQAQFDVEPIYPLRLFFEDFVMGVEGDCTI
ArtF       -----MNCTSVLQONHLREKRLQFIRAHQTAQFDVEPVFPPLQVFFEDFVFGVEGDCTI
TheF       -----MPREQRLQFIKAHQAAFEVEPLYPLALFEALVETFDDEDCAL
OscF       MIILSASDSTRPIFTLPKPLTQEOKLHCINAHRQAQFDVQPLYPLDIFQDFITKTDGIDTI

MicF1      -----MTLTSMLKNNHLKARRLQFLRGHQEAQFDVEPTFMLSLSFEEAVLGIETCGV
MicF2      -----MTLTSMLTNNHLKARRLQFLRGYQEAQFDVEPNFMLSLSFEEAVLGIETCGV
TenF       -----MTLTSMLQNNRLKDRRLQFIRTHQEAQFDVEPTFILSLFEEAVLGIETCGV
PatF       -----MDLIDRLQNNQKDRRLQFVRTHQEAQFDVKPTFPPLPLFEEAILEIEGSCSV
TruF2      -----MVLSQLSKQTNLRENRLRCIRTHLEAQFDIEPVLQISLFEEVIMEVEGSCNV

TruF1      EPSFKVQEGILFAGRVTTST-GT-EDWQHLLISTALNFFDAVESRVEVTIDRGLLEKFLTL
LynF       ELSCKIEADKLLAGRFLIFS-DQENNWHQSLAALQFLDSIESRVGVEINRESLDKFLAA
AcyF       EASCKIELDKLIASRFMFFFKDKAQWQKYLHQSLTFFNRVENLVGVQVDYSLLRQFLGS
PagF       EASCKIESDKLIASRFLLFFEDKTOEWQKYLHQSLTFFGLVENRVGVKINYSLLQOFLGS
Mic843F    QASCKIELDQLIASRFMLFFKDKAQEWQNYLAQSLAFFRQVENRVGVKLDYSLLQOFLGL
ArtF       EASCKVESDHLIASRFLLFFQEMTQSWPQKLDQAFRFFHQTENQVGVRLDYGLLQHFGLD
TheF       EASCKIEFDQLIASRFLIFF---SQNFQNLARVLNFMTOVNQRVDVQINTDLLYHFLGQ
OscF       EASCKIEADKLQAARFVALS---SQEIERKLTFTLFFRQVESRVDVQLNYDLLHKFLGK

MicF1      ESKCNVEKDQLFAIDFQVCN-DQGRTPMSLTHAVKFMDKIESTVGVRLNRNLLLEQFATL
MicF2      ESKCNVEKDQLFAIDFQVCN-DQGRTPMSLTHAVKFMDKIESTVGVRLNRNLLLEQFATL
TenF       ELMCHVEGDQLFAVDQVSN-ER-HTWPRSLTDAVKFLDKVESQVGVRLNRDLLQOQFVAV
PatF       ESSCQVEGDRLQGGRYEVCN-NQGTTPESLTHAFKLLDKIDSQLGVRINRDSFDRFAAA
TruF2      KCCKVERDRLFACQFTLAY-SQ-QKWPKTLKYNAILFDKIKSQVGVICIDSSKFEQFSRL

TruF1      HQNSDKIEASLMGIDLRPNVKESSLKVHLRLDPQDADELVMTAIDLGGDYSPELTQVL
LynF       HINSGKIMGISTGLDLRPELENSSVKIHIMLG--ENSEELVRTAIAIDGSHYPVELAQVL
AcyF       DFDFRKVTVLSAGIDLRSNIAESSLKMHTRIKDYPE---KLDQALSILAS-NAED--LISV
PagF       SFDFSKVTVLSAGIDLRNLAESSLKMHTRIKDYPE---KLDKAFALSD-GAAD--GNYL
Mic843F    NFNFSKITVFSTGIDLRNLAESSLKMHTRIKDYPE---KINQALLITS-DSDD--LIAV
ArtF       DFDFSKISVLSTGIDLRQNLADSSLKMHTRIKDYPE---KIATAFSLAK-LPRDKFHQIL
TheF       KFDFRKMIRLATGVDLRSNLADSSLKIHTRILEDYPE---KIESALALHG-NPDDASYWAD
OscF       SFDFSKVTRITTVGDLRPNISDSSLKIHTRILNDHPENLKKIEAALTLDG-NDSTAQRWIA

MicF1      HMDSHKIENNTVGVGIDLRPKNEDSCKIKVCLHLGSEEEPEELVRTALELDGGSYSPELLQVL
MicF2      HLDSHKIQDNTVGVGIDLRPRNEDSCKIKVYLHLGSEEEPEELVRTALELDGGSYSPELLQVL
TenF       HIGSSKILNNTIGIDLRPRHENSCKIKVYMHIEHEEDPEELVRTALKLDGGSYSSEMLOVL
PatF       HVNSRKIINNTIGVHLGSKLEDSSVMLYIHIKPEEDTEELARTALVLDGGRYSELTRVL
TruF2      HVNSDKILDSTVGVGIDLRPKSQDSCKIRISVHLEPKESPEELVRTALALDNATYTSSELQVF

```

TruF1 LKDTFLIGFDFFLDGGSAYEMYTICPGKKPLAMLGKKGAYLKPYVLSNFSHKVTSLLQEV  
 LynF LKDTMMIGFDFFLNHSEVELYISCSRKKDSLPN-NRGESTRYIYRQKFSPKVSSLLDAS  
 AcyF RPFLSLVGFDFYFNGRSEIELYPEIQAEDFAKSE-----TQNLVWRHFPKFVLDPLEVT  
 PagF KDFVNLIGFDFFYFNKGSEIEIYAQVEDDFKPE-----INNVLVQHFPKTALQPLKAS  
 Mic843F RDFSIVGFDFYFDGRSAIKIYPEVAETDFKPE-----TQDKVWRHLPKFVLEPLKAT  
 ArtF LSSVSLIGFDFFYLDGRSEIELYASLKEEEFNNSPH-----VQSFLTSTNFCASALKPLAAS  
 TheF LNAIANIGLDFYLDGRSEIEFYPELSEERFQQPE-----MQVLLQQMFPFVFLAPLKAS  
 OscF LQTVHLIGFDFFLNGRSEIELYCELTEKQFQQPD-----IQSFLQQTFPPFVLEPLKVS

MicF1 LKSTIVI GFNLF LN GYS DI ELWALAPGEQYEITNSDRGKYLKHYIQRNFSPKVNSLLKEC  
 MicF2 LKSTIVI GFNLF LN GYS DLELWATCPGEQYEVNSDRGKYLKQYVQNNFSQKINDLLRES  
 TenF LKSTIII GFNIF FN GYS DV ELLVATVGDKYESHKFNRGKYLKHYIQKNFSLKANYMLRES  
 PatF LRDTMVI GFELF FDGRSRV DLGPCAPGK--SGTLKMKGKHLEQYTQKNLSRKVNSIFREG  
 TruF2 LQDCTAI IFECF FDGRSRI ELGAVAPGKKHGFSG-NHGRALTAYAQKYFSPKAVSLSEVS

TruF1 AALTVGFSKEN--PRPVLYFEFETLREVKYNLLFNLSLGDKIYDFCLHNQIENFVSIQVTEP  
 LynF DFFVGGFSKAN--VEPVLYYAFENIKDIPKYFVFNLDLGNRVYDFCRSQDSITMTWIGINER  
 AcyF GSFLVGFSGKAN--PNPVLYYNLKNKQDLANYFKLNDAAQRVHSFYQNDILPHMWVGTQVK  
 PagF SLFFTGLSKAN--NNPVLYYHLKNRQDLTNYFKLNDTAQRVHSFYQHODILPYMWVGTQVK  
 Mic843F SLFGFGFSKTN--NNPVLYYRLKNRQDLTNYFKLNDTAQRVHSFYQHODILSSVWLGTQVK  
 ArtF SAFYMGLSIAN--ENPVLYYLLKNKQELQNYFRLNDTGNRVHSL-----  
 TheF EIFFGFLSKAN--PSAVLYYQLKNKQDLPSYFAINDKAHQVHGYYLHQDTRPYMCVGAQS  
 OscF SVFFTGLSKDN--TEPVLYYCLKDKKDLLSYFPINDTAQRVHAFYQNPVYSSMWVGAQK

MicF1 TFFCVSFFHKK--EPVLIIFHYEDTKEIPKNEFFNSLGDRIYSFCQGGDCMTYAGVAVTER  
 MicF2 TFLVVSFSNQK--EPALIFHYEDIKEIPKNEFLNLSLGDRIYSFCQGGDCMTYAGVAVTER  
 TenF NILLVSFSQAQKVNPLLIFHYEDIKDIRKYFSFNLSGDRSYSFFQSGDCITYAGVSVREL  
 PatF YLFGAFFSKTR--VEPILFFYHSIIKDLPKYFTFNLSLGDKIYNFCQSGGCITDVAIAVTET  
 TruF2 DLFGMTISKYK--AEPVLHFGFNKIDISNYFLFNLTGNRIYSFCQNGDCILLAIIGVNEK

TruF1 DLEKRLENFRFYRKAV-----  
 LynF DLDRERLNNFRLYYRRSFG-----  
 AcyF ELEKTRIENVRLYYYKFFN-----  
 PagF ELEKTRIENIRLYYKSFKMESN-----  
 Mic843F ELEKTRIENVRLYYYKLFGL-----  
 ArtF -----  
 TheF ELAKTRIDQIRLYYHQFFKVQNP-----  
 OscF ELQKTRIDNIRLYYSKKNYSK-----

MicF1 ELEKDRLENFSILYNQRDECKPLLHIKKREDF  
 MicF2 ELEKDRLENFSILYNQRDECKPLLHIKKREDF  
 TenF ELQKDRLEKFSLFYNKRDKCQHLPLFSTLNE--  
 PatF ELEKSRLNFCFYDQWDECKPSSDYDTERHLH  
 TruF2 ELYSNRLENFLFDYAKNDESRMMRV-----

**Figure S9.** Sizing column chromatogram for LynF and resulting SDS-PAGE gel (a) Size-exclusion chromatogram showing elution of LynF. Protein elution was detected at 280 nm, and is shown in mAu; along the x-axis is time in minutes and fraction number (the fraction size was 4.5 mL). Purest fractions ultimately used for experiments are highlighted with box (b) SDS-PAGE gel showing analysis of size-exclusion chromatography fractions; fractions 13-15 of size purification used for most experiments described in paper. Key to abbreviations: E1=Ni-NTA elution 1, E2=Ni-NTA elution 2, T=after treatment with thrombin to cleave his-tag, Inj=sample of material injected on sizing column, 8-27=sizing column fraction number, L=ladder, Std=previously prepared LynF sample purified by Ni-NTA chromatography only.

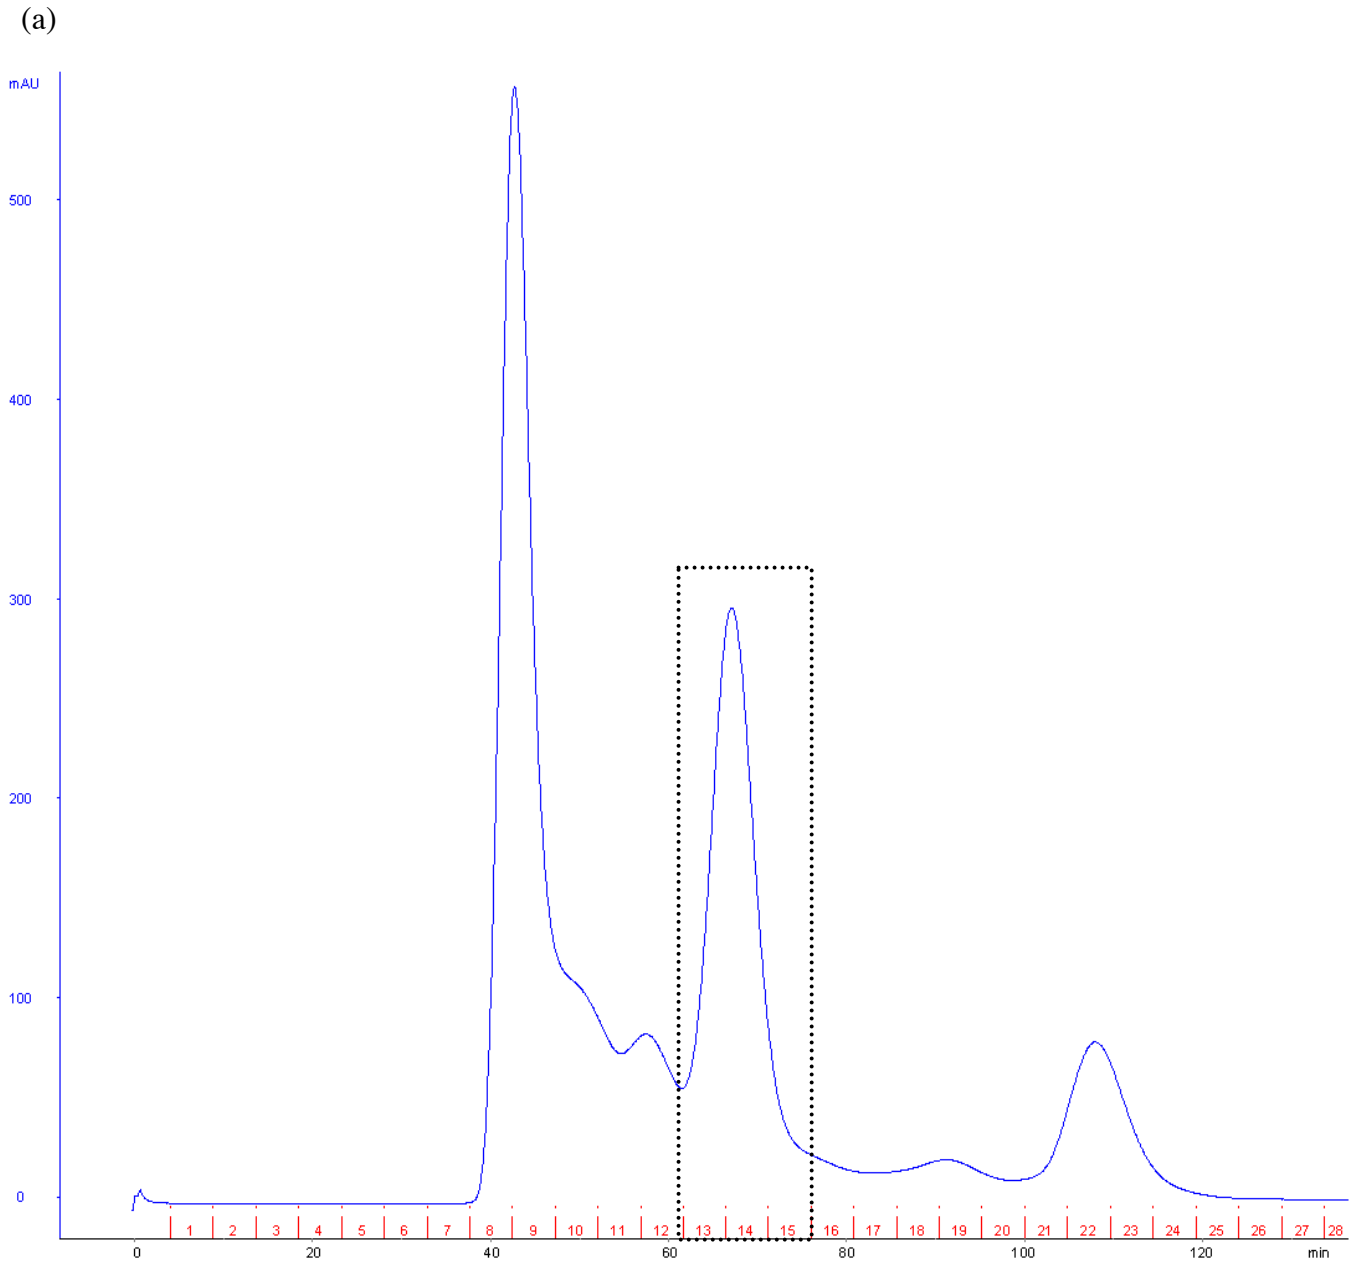

(b)

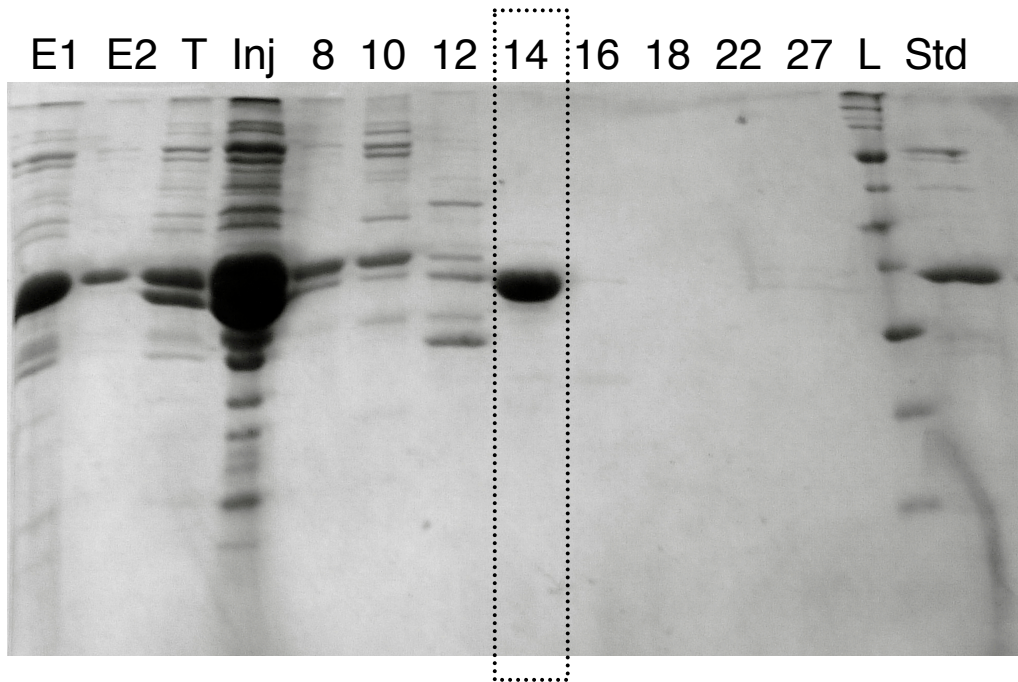



## Materials and Methods

### Synthesis of substrates.

Dimethylallyl pyrophosphate (DMAPP) was synthesized following previously established procedures.<sup>1-3</sup> Briefly, disodium dihydrogen pyrophosphate (15 mmol, 3.3g) was dissolved in 15 mL of a 10% (v/v) solution of ammonium hydroxide. That solution was put over a column containing Dowex AG 50W-X8 column (58 mequiv, acidic form), and eluted with 110 mL of deionized water to give the free acid. The eluent was titrated to pH 7.3 (as measured by a pH meter) with a 40% solution of tetra-*n*-butylammonium hydroxide. The solution was then dried by lyophilization to give tris(tetra-*n*-butylammonium) hydrogen pyrophosphate (**32**). Next, **32** (2.5 mmol, 2.3g) was dissolved in 2.5 mL of acetonitrile. The pyrophosphate solution was placed on ice, with stirring under a blanket of argon. Dimethylallyl bromide (1.2 mmol, 1 M in acetonitrile) was then added dropwise to the pyrophosphate solution. The reaction proceeded for 2 h, during which time it was allowed to come to room temperature. After solvent removal, the residue was dissolved in ion-exchange buffer (1:49 v/v Isopropanol : 25 mM aqueous ammonium bicarbonate) and run on a column containing Dowex AG 50W-X8 (18.8 mequiv, ammonium form). Finally, chromatography on cellulose (2, 3) afforded dimethylallyl pyrophosphate, ammonium salt. <sup>1</sup>H NMR (400 MHz, D<sub>2</sub>O) δ 5.39 (1H, t, *J*=7.03 Hz), 4.39 (2H, dd, *J*<sub>H,H</sub>=6.64 Hz, *J*<sub>H,P</sub>=6.64 Hz), 1.70 (3H, s), 1.66 (3H, s); <sup>31</sup>P NMR (162 MHz, D<sub>2</sub>O) δ -5.96 (1P, d, *J*<sub>P,P</sub>=21.7 Hz), -9.23 (1P, d, *J*<sub>P,P</sub>=20.6).

Unless otherwise noted, peptide substrates were synthesized at the University of Utah DNA/peptide synthesis core facility using standard Fmoc chemistry. Cyclic peptide **6** was cyclized in solution, leading to small amounts of **9** and **10**. HPLC purification effected purification of **6** from **9** and **10**, which co-eluted and were used as a mixture in prenyltransferase experiments. Substrates **11** and **12** were synthesized as a linear precursor (KKPYILPAYDGE) and then enzymatically cyclized as reported elsewhere.<sup>4</sup> Synthesis and characterization of **26** and **27** has been previously reported.<sup>5,6</sup>

Boc-protection of 4-iodo-L-phenylalanine and 4-methoxy-L-phenylalanine was performed according to previously established procedures.<sup>7</sup> Briefly, to a stirred solution of amino acid (0.3 M in 50/50 THF/H<sub>2</sub>O) was added di-*tert*-butyl dicarbonate (1.1 equiv), and triethylamine (1 equiv). The reactions were stirred at room temperature until the starting material was consumed, as determined by TLC. Reaction mixtures were then dried by rotary evaporation to remove THF, and then lyophilized. The residue was then dissolved in aqueous sodium hydroxide (1 M, 2 equiv) and extracted twice with CH<sub>2</sub>Cl<sub>2</sub>; the solutions were acidified and extracted three times with CH<sub>2</sub>Cl<sub>2</sub>. The acid extracts were then combined and dried by rotary evaporation. Prior to use in enzyme reactions, small amounts of each boc-protected amino acid were subjected to additional purification by reversed-phase HPLC. To wit, the amino acid derivatives were injected on a C18 onyx monolithic semiprep column (Phenomenex) on a linear gradient from 50% buffer A (H<sub>2</sub>O, 0.05% TFA) to 100% buffer B (acetonitrile) over 60 minutes.

**Boc-4-iodo-L-Phe:** <sup>1</sup>H NMR (400 MHz, CDCl<sub>3</sub>) δ 7.62 (2H, br), 6.93 (2H, br), 4.90 (1H, s), 4.56 (1H, br), 3.13 (1H, br), 3.03 (1H, br), 1.42 (9H, s); <sup>13</sup>C NMR (100 MHz, DMSO *d*<sub>6</sub>) δ 173.4, 155.4, 137.9, 136.8, 131.6, 92.2, 78.1, 54.9, 35.9, 28.1. **Boc-4-methoxy-L-Phe:** <sup>1</sup>H NMR (400 MHz, DMSO *d*<sub>6</sub>) δ 7.14 (2H, br), 6.83 (2H, br), 4.00 (1H, br), 3.70 (3H, br), 2.91 (1H, br), 2.74 (1H, ap t, *J*=10.8 Hz), 1.31 (9H, s). <sup>13</sup>C NMR (100 MHz, DMSO *d*<sub>6</sub>) δ 173.7, 157.9, 155.5, 130.1, 129.9, 113.6, 78.0, 55.5, 55.0, 35.6, 28.2.

Boc-L-tyrosine, sodium hydrogen pyrophosphate, dimethylallyl bromide, tetrabutylammonium hydroxide, and dopamine HCl were purchased from Sigma. N-acetyl-L-tyrosine and phenol were purchased from Fisher Scientific. All other Tyr and Phe derivatives were purchased from ChemImpex.

## Genes and Cloning

A codon-optimized version of *lynF* was synthesized and cloned into pET28 in frame with the N-terminal his-tag sequence using NdeI and EcoRI (Genscript). The vector pRSF-truE1-DIacI was described previously.<sup>8</sup> Oligonucleotides were designed to swap the region of truE1 encoding patellin 2 (TVPTLC) for a region encoding a cassette found in the *lyn* pathway (VCMPCYP). The resulting construct (pRSF-LynE-DIac) was confirmed using DNA sequencing. This construct was then cloned into pET28b using NdeI and BamHI.

## Protein Expression and Purification

The plasmid encoding *lynF* was transformed into BL21(DE3) cells via electroporation and grown at 30 °C. Colonies were picked the following day and grown overnight in 2 x 45 mL starter cultures (LB media, 50 µg/mL kanamycin) at room temperature. The starter cultures were then used to inoculate 8 x 1 L cultures (LB, 50 µg/mL kanamycin) in 2.8 L Fernbach flasks and grown at 30 °C until an A600 of 0.4 was reached. Upon reaching the desired optical density, the temperature was lowered to 15 °C and IPTG (0.1 mM final concentration) was added, and expression was allowed to proceed overnight. Cells were then pelleted by centrifugation, and frozen at -80 °C until purification. Cell lysis was performed according to previously established procedures. Briefly, cells were resuspended in cold lysis buffer (200 mM NaCl, 50 mM Tris pH 7.5, 100 µM EDTA, 5 mL per gram of cell paste) to which lysozyme (600 µg/mL), PMSF (1 mM), and imidazole (10 mM) were added. The suspension was then incubated on ice with stirring for 1 h, after which time MgCl<sub>2</sub> (10 mM) and DNase I (20 µg/mL) were added and incubation on ice was continued for a further 0.5 h. After lysis was complete, the suspension was centrifuged at 14,000 RPM in a JA-20 rotor for 1 h at 4 °C. Cleared lysates were then passed through a 0.45 µm syringe filter, and then ATP (2 mM) was added. Lysate was then applied to a gravity column containing a 5 mL bed of nickel-NTA resin (Qiagen). The lysate was allowed to equilibrate on resin for 15 minutes and then allowed to flow through. The column was then washed with 20 column volumes of wash buffer (500 mM NaCl, 25 mM imidazole, 2 mM ATP pH 8.0), and then eluted with 2 x 15 mL of elution buffer (750 mM NaCl, 250 mM imidazole pH 8.0). In order to cleave the his-tag, thrombin was added to the eluents (33 nM), which were then placed in 8,000 MWCO dialysis tubing and stirred in dialysis buffer (0.5 M NaCl, 25 mM HEPES pH 8.0) overnight at 4 °C. Following dialysis, LynF-containing fractions were concentrated and run on an S-75 sizing column, for which an isocratic buffer (0.5 M NaCl, 25 mM HEPES pH 8.0) was employed. Fractions were tested for activity, the portion eluting between 65 and 77 mL was significantly more active as determined by MALDI-MS analysis of reactions containing **6**. The active fractions were then dialyzed into storage buffer (0.5 M NaCl, 25 mM HEPES pH 8.0, 10% glycerol), flash frozen in liquid nitrogen, and frozen at -80 °C until use.

Expression of *truLy1* was performed in a similar fashion, with the main difference being that rather than attempting to isolate soluble protein, *truLy1* was strongly overexpressed with the intent of driving the protein into inclusion bodies, after which time purification under denaturing conditions was performed. To wit, 8 x 1L cultures (sLB: 10 g/L soytone, 10 g/L NaCl, 5 g/L yeast extract, 50 µg/mL kanamycin) containing the *truLy1* plasmid were grown at 37 °C and upon reaching an A600 of 0.4, induced with 1 mM IPTG and allowed to grow overnight. Cell lysis and denaturing Ni-NTA purification was effected according to the manufacturer's protocol (Qiagen). The concentration of TruLy1 was assessed by amino acid analysis.

## Enzyme Assays

Enzyme reactions typically contained enzyme (3.8 µM), variable substrate concentration (100 µM for most substrates; higher concentrations, i.e. 1 mM, were occasionally employed with boc-protected amino acid derivatives. Exceptions include substrates **11** and **12**, which were used at

20  $\mu\text{M}$  final concentration as well as substrates **9**, and **10**, which were used at 70 and 30  $\mu\text{M}$ , respectively), and several additives (1 M NaCl, 40 mM glycylglycine pH 9.0, 12 mM  $\text{MgCl}_2$ , 3 mM tris(2-carboxyethyl) phosphine (TCEP), and 1 mM DMAPP). Reactions were incubated at 37  $^\circ\text{C}$  for 24 h in a DNA Engine Peltier thermocycler (Bio-Rad). Enzyme reactions with full-length precursor peptide contained TruLy1 (28  $\mu\text{M}$ ), ATP (0.8 mM), with or without heterocyclase enzyme TruD (90 nM), and additives as above. Controls were run to ensure that LynF was active in the presence of TruD and TruLy1, and vice versa.

Reactions prepared for kinetic analysis of boc-L-Tyr were prepared in triplicate, and contained variable substrate concentrations (1, 2, 4, 8, and 16 mM), constant enzyme (0.9  $\mu\text{M}$ ), DMSO (4% v/v) for solubility, and additives as described above. The reactions were incubated for 3 h at 37  $^\circ\text{C}$  as above, halted by addition of guanidinium HCl (1 M), and then frozen at -80  $^\circ\text{C}$  until HPLC analysis. A sample of each reaction (15  $\mu\text{L}$ ) was injected onto a 214MS C4 5 $\mu$  column (Grace-Vydac) and run on a linear gradient from 99% buffer A ( $\text{H}_2\text{O}$ , 0.5% TFA) / 1% buffer B (AcN) to 0% A / 100% B over 45 minutes. Peaks corresponding to O-prenyl and C-prenyl products were integrated, and summed to arrive at the total integrated area corresponding to prenylated product. The integrated areas were plotted on a calibration curve to determine what molar amounts of product they represented. The data were then analyzed using GraphPad Prism to derive kinetic curves and parameters.

Kinetic analysis of cyclo[APMPPYP] was performed in a similar fashion, with variable substrate concentrations (0.9, 2.1, 3.3, 6.6, 9, and 10.1 mM) and constant enzyme (1.8  $\mu\text{M}$ ). Reactions were incubated as above and quenched in an identical manner. HPLC conditions differed only in that the run began by holding the solvent mixture at 99% buffer A / 1% buffer B for the first 5 minutes, then stepped to 80% buffer A / 20% buffer B at which time a linear gradient to 60% buffer A / 40% buffer B over 34 minutes was begun. Additionally, controls were run with both boc-L-Tyr and cyclo[APMPPYP] to ensure that the rate of product formation was linear over the first several hours. To wit, reactions containing boc-L-Tyr (1, 4, and 8 mM), constant enzyme (0.9  $\mu\text{M}$ ), DMSO (4% v/v) for solubility, and additives as described above were incubated at 37  $^\circ\text{C}$ . Aliquots were removed at three time points (2, 4, and 6 h), and analyzed as above. A similar set of controls was performed containing cyclo[APMPPYP] (2.1, 3.3, and 6.6 mM), constant enzyme (1.8  $\mu\text{M}$ ), DMSO (4% v/v), and additives as described above. Data presented in figure 5 were generated via analysis of a time-course of the LynF (5.4  $\mu\text{M}$ ) reaction with boc-L-Tyr (1 mM) containing standard additives. Reaction aliquots (17.5  $\mu\text{L}$ ) were removed at 1, 2, 4, 6, and 24 h and immediately mixed with guanidinium HCl (3.5  $\mu\text{L}$ , 6 M) and then placed at -80  $^\circ\text{C}$  until HPLC analysis.

Experiments assaying prenylation of TruLy1 were performed as follows: LynF (1.5  $\mu\text{M}$ ) or buffer control was incubated with either TruLy1 (14  $\mu\text{M}$ ), boc-L-Tyr (14  $\mu\text{M}$ ), cyclo[APMPPYP] (14  $\mu\text{M}$ ), without substrate, additives as above with the exception of DMAPP, and  $^3\text{H}$ -labeled DMAPP (0.1  $\mu\text{M}$ ) (American Radiolabeled Chemicals), which had previously been dried under a stream of argon, and resuspended in ultrapure water. Reactions were covered with a mineral oil overlay (30  $\mu\text{L}$ ) and placed in a heat-block at 37  $^\circ\text{C}$  for 24h. Once complete, reaction aliquots (20  $\mu\text{L}$ ) were then quenched by addition of acid (2 M HCl in 80% EtOH, 4  $\mu\text{L}$ ), incubated a further 30 minutes to hydrolyze any remaining DMAPP. The resulting mixture was then added to a 7 mL scintillation vial along with water (150  $\mu\text{L}$ ), and placed in a sand-bath at 110  $^\circ\text{C}$  for 1.5 h. Resolubilization was then effected via addition of Soluene 350 (1 mL) (Perkin-Elmer), and heating in a sand bath at 50  $^\circ\text{C}$  for 1 h. Scintillation fluid (up to 7 mL) (Hionic-Fluor, Perkin-Elmer) was then added. Samples were placed in the dark for 30 minutes and then read by scintillation counting (5 minutes per sample). Radioassay samples were also analyzed by autoradiography, in which case a reaction aliquot (15  $\mu\text{L}$ ) was mixed with 6X SDS-PAGE buffer (0.6 M DTT, 0.35 M tris pH 6.8, 30% (v/v) glycerol, 10% (w/v) SDS, 0.012% (w/v) bromophenol blue, 3  $\mu\text{L}$ ), boiled for 5 minutes, and run on an 18%

polyacrylamide gel. After staining with Coomassie R250, gels were destained, and enhanced for autoradiography using En3hance (Perkin-Elmer) according to the manufacturer's instructions. Film (BioMax XAR, Kodak) was then exposed to the enhanced gel at -80 °C for at least 24 h and then developed. Lastly, possible prenylation of TruLy1 was assessed via ESI-MS intact analysis, as well as by proteolytic digest followed by LC-FT-ICR. In those cases, LynF (1.5 μM) was incubated with TruLy1 (14 μM) or boc-L-Tyr (640 μM), additives as above, and ATP (800 μM). Reactions were run at 37 °C for 24h; samples were taken at 0, 6, 12, and 24h time points, and were then analyzed by ESI-MS. Control reactions were run containing TruD (90 nM), or lacking ATP and TruD, and also analyzed by ESI-MS after 24h incubation. Boc-L-Tyr containing reactions were analyzed by HPLC as positive controls. Samples analyzed by LC-FT-ICR were digested either with previously characterized cyanobactin protease PatA (2 μM) including added calcium (10 mM),<sup>6</sup> or with trypsin and chymotrypsin.

Isolation of O-prenylated intermediate was performed as follows: a crude fraction of LynF (6.3 μM) was incubated with boc-D-Tyr (3.5 mM, 8.8 μmol), DMSO (1% v/v) for solubility, and additives as above. The reaction was allowed to proceed for 48 h at 37 °C. The reaction was then acidified (pH 4) with 1 M HCl and then extracted 5X with methylene chloride. The combined organic phases were then dried, and purified by HPLC. Purification was performed using a Onyx monolithic C18 semi-preparative column on a linear gradient from 99% buffer A (H<sub>2</sub>O, 0.05% TFA) / 1% buffer B (AcN) to 100% buffer B over 60 minutes. The dominant C-prenylated product was purified along with the O-prenyl product.

To assess whether the conversion of reverse O-prenylated Tyr to forward C-prenylated Tyr was accelerated by LynF, the O-prenylated intermediate was purified as above, and then incubated at 37 °C with additives as above, excepting DMAPP, and either LynF (2.3 μM), boiled LynF (2.3 μM), or buffer only. Time points were taken at 0 and 8 h, and then frozen at -80 °C until analysis.

### Phylogenetic Tree Construction

The amino acid sequences of LynF homologues from the functionally characterized cyanobactin pathways were aligned using CLUSTALX. Maximum likelihood analysis with molecular clock PROMLK (PHYLIP) using the bootstrap test method (1000 replicates) was performed to assess the phylogenetic relationship between the different homologues. The same tree branches were also supported using other phylogenetic experiments such as Maximum Parsimony (MEGA 4.0) using 1000 bootstrap replicates.

### Preparative Enzymatic Synthesis

Preparative synthesis of prenylated boc-L-Tyr was performed as follows: a crude fraction of LynF (6.3 μM) was incubated with boc-L-Tyr (3.5 mM, 17.8 μmol) and additives as above. The reaction was incubated at 37 °C for 48 h and extracted as described above for boc-D-Tyr. Purification was accomplished using a Vydac C4 214TP1010 semi preparative column on a linear gradient from 99% buffer A (H<sub>2</sub>O, 0.05% TFA) / 1% buffer B (AcN) to 100% buffer B over 45 minutes.

Preparative synthesis of prenylated boc-D-Tyr was performed as described in the previous section. The purified O- and C-prenylated products were subjected to NMR analysis: **Boc-4-O-(2-methylbut-3-en-2-yl)-D-tyrosine**: <sup>1</sup>H NMR (500 MHz, CDCl<sub>3</sub>) δ 7.01 (2H, d, *J*=8.5 Hz), 6.90 (2H, d, *J*=8.5 Hz), 6.10 (1H, dd, *J*=17.3, 10.5), 5.14 (1H, ap d, *J*=17.8), 5.11 (1H, ap d, *J*=11.5), 4.88 (1H, s), 4.49 (1H, br), 3.10 (1H, br), 2.98 (1H, br), 1.42 (6H, s), 1.40 (9H, s). **Boc-3-(3-methylbut-2-en-1-yl)-D-tyrosine**: <sup>1</sup>H NMR (500 MHz, CDCl<sub>3</sub>) δ 6.90 (1H, d, *J*=8.0 Hz), 6.89 (1H, s), 6.71 (1H, d, *J*=8.0 Hz), 5.27 (1H, t, *J*=6.6 Hz), 4.86 (1H, s), 4.47 (1H, br), 3.30 (2H, d, *J*=7.0 Hz), 3.07 (1H, m), 3.00 (1H, br), 1.75 (6H, ap s), 1.41 (9H, s)

Preparative synthesis of prenylated cyclo[APMPPYP] was performed by incubation of sizing-column purified LynF (5  $\mu$ M) with cyclo[APMPPYP] (0.4 mM) and additives as above. The reaction was incubated at 37 °C for 88 h, and then frozen at -20 °C. Purification was accomplished using a Vydac C4 214TP1010 semi preparative column on a linear gradient from 99% buffer A (H<sub>2</sub>O, 0.05% TFA) / 1% buffer B (AcN) to 100% buffer B over 45 minutes.

Preparative synthesis of prenylated boc-D-Tyr was performed as described in the previous section. The purified O- and C-prenylated products were subjected to NMR analysis: **Boc-4-O-(2-methylbut-3-en-2-yl)-D-tyrosine**: <sup>1</sup>H NMR (500 MHz, CDCl<sub>3</sub>)  $\delta$  7.01 (2H, d,  $J=8.5$  Hz), 6.90 (2H, d,  $J=8.5$  Hz), 6.10 (1H, dd,  $J=17.3, 10.5$ ), 5.14 (1H, ap d,  $J=17.8$ ), 5.11 (1H, ap d,  $J=11.5$ ), 4.88 (1H, s), 4.49 (1H, br), 3.10 (1H, br), 2.98 (1H, br), 1.42 (6H, s), 1.40 (9H, s). **Boc-3-(3-methylbut-2-en-1-yl)-D-tyrosine**: <sup>1</sup>H NMR (500 MHz, CDCl<sub>3</sub>)  $\delta$  6.90 (1H, d,  $J=8.0$  Hz), 6.89 (1H, s), 6.71 (1H, d,  $J=8.0$  Hz), 5.27 (1H, t,  $J=6.6$  Hz), 4.86 (1H, s), 4.47 (1H, br), 3.30 (2H, d,  $J=7.0$  Hz), 3.07 (1H, m), 3.00 (1H, br), 1.75 (6H, ap s), 1.41 (9H, s)

Preparative synthesis of prenylated cyclo[APMPPYP] was performed by incubation of sizing-column purified LynF (5  $\mu$ M) with cyclo[APMPPYP] (0.4 mM) and additives as above. The reaction was incubated at 37 °C for 88 h, and then frozen at -20 °C. Purification was accomplished using a Vydac C4 214TP1010 semi preparative column; the run was begun by holding the solvent mixture at 99% buffer A / 1% buffer B for the first 5 minutes, then stepped to 80% buffer A / 20% buffer B at which time a linear gradient to 60% buffer A / 40% buffer B over 55 minutes was begun.

## General Methods

ESI-MS, and FT-ICR analyses were performed at the University of Utah Mass Spectrometry and Proteomics core facility. MALDI-MS analyses were performed on a Micromass MALDI micro MX instrument (Waters). HPLC separations were performed on a LaChrom Elite system (Hitachi). NMR spectra were collected either on 400 or 500 MHz spectrometers (Varian). CD spectra were collected on a Jasco J-815 spectrometer, and data were plotted in Excel.

Table S1. Substrates used in this study.

| #  | Substrate                | Result | Analytical Method(s)                           |
|----|--------------------------|--------|------------------------------------------------|
| 3  | TruLy1 precursor peptide | NR     | ESI-MS, LC-FT-ICR, radioassay, autoradiography |
| 4  | TruD-treated TruLy1      | NR     | ESI-MS, LC-FT-ICR, radioassay, autoradiography |
| 5  | APMPPYPSYDDAE            | NR     | MALDI-MS, HPLC                                 |
| 6  | cyclo[APMPPYP]           | 48%    | MALDI-MS, HPLC, LC-FT-ICR, NMR, radioassay     |
| 7  | APMPPYP                  | 12%    | MALDI-MS, HPLC, LC-FT-ICR                      |
| 8  | N-acetyl APMPPYP         | 10%    | HPLC                                           |
| 9  | cyclo[APMPPPAPMPPYP]     | 47%    | MALDI-MS, LC-FT-ICR                            |
| 10 | cyclo[APMPPYPAPMPPYP]    | 43%    | MALDI-MS, LC-FT-ICR                            |
| 12 | cyclo[KKPYILP]           | 37%    | MALDI-MS, LC-FT-ICR                            |
| 12 | cyclo[KPYILP]            | 94%    | MALDI-MS, LC-FT-ICR                            |
| 13 | KPYILP                   | 1%     | MALDI-MS, LC-FT-ICR                            |
| 14 | Boc-L-Tyr                | 71%    | HPLC, FT-ICR, NMR, CD, radioassay              |
| 15 | Boc-D-Tyr                | 66%    | HPLC, NMR, CD                                  |
| 16 | Boc-4-cyano-L-Phe        | NR     | HPLC                                           |
| 17 | Boc-O-allyl-L-Tyr        | NR     | HPLC                                           |
| 18 | Boc-4-iodo-L-Phe         | NR     | HPLC                                           |
| 19 | Boc-4-methoxy-L-Phe      | NR     | HPLC                                           |
| 20 | L-Phe                    | NR     | HPLC                                           |
| 21 | N-acetyl-L-Tyr           | 3%     | HPLC, ESI-MS                                   |
| 22 | L-Tyr                    | NR     | HPLC                                           |
| 23 | Dopamine                 | NR     | HPLC                                           |
| 24 | Phenol                   | NR     | HPLC                                           |
| 25 | L-Trp                    | NR     | HPLC                                           |
| 26 | cyclo[QGGRGDWP]          | NR     | MALDI-MS                                       |
| 27 | QGGRGDWPAVDGE            | NR     | MALDI-MS                                       |

**TruLy1:**

MGSSHHHHHHSSGLVPRGSHMNKKNILPQLGQPVIRLTAGQLSSQLAELSE  
EALGGVDASTLPVPTLCSYDGVDAVCMPYPSYDD

**TruLy1 with 3 heterocycles:**

MGSSHHHHHHSSGLVPRGSHMNKKNILPQLGQPVIRLTAGQLSSQLAELSE  
EALGGVDASTLPVPTL (Tz) SYDGVDAV (Tz) MP (Tz) YPSYDD  
Tz=thiazoline

Table S2. Summary of FT-ICR data

| Substrate | Product <sup>a</sup>      | Expected $m/z$                 | Observed $m/z$ | $\Delta$ ppm |
|-----------|---------------------------|--------------------------------|----------------|--------------|
| <b>6</b>  | cyclo[APMPPyP]            | 822.4219 (M+H <sup>+</sup> )   | 822.4216       | -0.36        |
| <b>7</b>  | APMPPyP                   | 840.4324 (M+H <sup>+</sup> )   | 840.4328       | -0.47        |
| <b>9</b>  | cyclo[APMPPPAPMPPyP]      | 706.8589 (M+2H <sup>2+</sup> ) | 706.8593       | +0.56        |
| <b>10</b> | cyclo[APMPPyPAPMPPYp]     | 788.3906 (M+2H <sup>2+</sup> ) | 788.3912       | +0.76        |
| <b>10</b> | cyclo[APMPPyPAPMPPyP]     | 822.4219 (M+2H <sup>2+</sup> ) | 822.4227       | +0.97        |
| <b>11</b> | cyclo[KKPyILP]            | 454.8020 (M+2H <sup>2+</sup> ) | 454.8019       | -0.22        |
| <b>12</b> | cyclo[KPyILP]             | 780.5018 (M+H <sup>+</sup> )   | 780.5013       | -0.64        |
| <b>13</b> | KPyILP                    | 798.5124 (M+H <sup>+</sup> )   | 798.5137       | +1.6         |
| <b>14</b> | O- and C-prenyl boc-L-Tyr | 350.1962 (M+H <sup>+</sup> )   | 350.1966       | +1.1         |

<sup>a</sup>‘Y’ denotes tyrosine, ‘y’ denotes prenylated tyrosine

- (1) Davisson, V. J.; Woodside, A. B.; Neal, T. R.; Stremler, K. E.; Muehlbacher, M.; Poulter, C. D. *J. Org. Chem.* **1986**, *51*, 4768-4779.
- (2) Woodside, A. B.; Huang, Z.; Poulter, C. D. *Organic Syntheses, Coll.* **1988**, *66*, 211.
- (3) Woodside, A. B.; Huang, Z.; Poulter, C. D. *Organic Syntheses, Coll.* **1993**, *8*, 616.
- (4) McIntosh, J. A.; Robertson, C. R.; Vinayak, A.; Satish, N. K.; Bulaj, G. W.; Schmidt, E. W. *J. Am. Chem. Soc.* **2010**, *132*, 15499-15501.
- (5) Donia, M. S.; Hathaway, B. J.; Sudek, S.; Haygood, M. G.; Rosovitz, M. J.; Ravel, J.; Schmidt, E. W. *Nat. Chem. Biol.* **2006**, *2*, 729-735.
- (6) Lee, J.; McIntosh, J. A.; Hathaway, B. J.; Schmidt, E. W. *J. Am. Chem. Soc.* **2009**, *131*, 2122-4.
- (7) Stankova, I. G.; Videnov, G. I.; Golovinsky, E. V.; Jung, G. *J. Peptide Sci.* **1999**, *5*, 392-398.
- (8) Donia, M. S.; Schmidt, E. W. *Chem. Biol.* **2011**, *18*, 508-19.
